# Supplementary material for: Insights into the mechanism and origin of multifunctional ligand effects on chemoselectivity in Pd-catalyzed unnatural prenylation and geranylation of oxindoles with isoprene
Source: Royal Society of Chemistry journal article supplement (doi:10.1039/d4qo00014e), 2024-01-01
Supplement: d4qo00014e1.pdf [file d4qo00014e1.pdf]

## Insights on the Mechanism and Origin of Multifunctional Ligand Effects on Chemoselectivity in Pd-catalyzed Unnatural Prenylation and Geranylation of Oxindoles with Isoprene

Manzhu Zhao, Haiyan Yuan\*, Jingping Zhang\*

Faculty of Chemistry, Northeast Normal University, Changchun 130024, China

\*yuanhy034@nenu.edu.cn; jpzhang@nenu.edu.cn

### Contents

|                   |                                                                                                                                                                                                                                  |             |
|-------------------|----------------------------------------------------------------------------------------------------------------------------------------------------------------------------------------------------------------------------------|-------------|
| <b>Figure S1.</b> | Energy profiles for the key structures in the most preferred pathway PA3 calculated by M06 functional (blue line) and B3LYP-D3 functional (pink line), free energies are given in kcal/mol.                                      | S3          |
| <b>Figure S2.</b> | Energy profiles for the key structures in the most preferred pathway PB3 calculated by M06 functional (blue line) and B3LYP-D3 functional (pink line), free energies are given in kcal/mol.                                      | S4          |
| <b>Figure S3.</b> | Electrostatic potentials on the monomers' van der Waals surface of <b>TS1a</b> , <b>TS3a</b> , and <b>TS4a</b> (red = -8 kcal/mol; blue = +8 kcal/mol).                                                                          | S5          |
| <b>Figure S4.</b> | Electrostatic potentials on the monomers' van der Waals surface of <b>TS2b</b> , <b>TS4b</b> , and <b>TS5b</b> (red = -8 kcal/mol; blue = +8 kcal/mol).                                                                          | S6          |
| <b>Figure S5.</b> | Noncovalent interaction analysis (blue, strong attraction; green, weak interaction) for the front view and side view of transition states <b>TS1a</b> , <b>TS3a</b> , and <b>TS4a</b> .                                          | S7          |
| <b>Figure S6.</b> | Figure S6. Noncovalent interaction analysis (blue, strong attraction; green, weak interaction) for the front view and side view of transition states <b>TS2b</b> , <b>TS4b</b> , and <b>TS5b</b> .                               | S8          |
| <b>Figure S7.</b> | FMO analysis for PdL1 and PdL2.                                                                                                                                                                                                  | S9          |
| <b>Figure S8.</b> | The structures for <b>PdL1</b> , <b>PdL2</b> , and <b>PdL3</b> .                                                                                                                                                                 | S9          |
| <b>Table S1.</b>  | Estimation of Noncovalent Interaction Energies ( $E_{\text{HB}}$ ) Using Espinosa Equation ( $E_{\text{HB}} = 1/2V(r_{\text{cp}})$ ) in the Lower Energy Enantiocontrolling <b>TS1a</b> , <b>TS4a</b> , <b>TS4a</b> .            | S10         |
| <b>Table S2.</b>  | The second-order perturbation stabilization energies ( $E(2)$ , kcal/mol) for transition states <b>TS1a</b> , <b>TS2a</b> , <b>TS4a</b> , and <b>PB3-TS5b-L1</b> between the Pd centre and the coordination atoms (P, O, and C). | S11-<br>S12 |
| <b>Table S3.</b>  | The second-order perturbation stabilization energies ( $E(2)$ , kcal/mol) for transition states <b>TS5b</b> , <b>TS2b</b> , and <b>TS3b</b> between the Pd centre and the coordination atoms (P, O, and C).                      | S13-<br>S14 |
| <b>Table S4.</b>  | Estimation of Noncovalent Interaction Energies ( $E$ , in kcal/mol) Using Espinosa Equation ( $E = 1/2V(r_{\text{cp}})$ ) in <b>TS4b</b> ,                                                                                       | S15         |

|                  |                                                                                                                                              |          |
|------------------|----------------------------------------------------------------------------------------------------------------------------------------------|----------|
|                  | and <b>TS5b</b> .                                                                                                                            |          |
| <b>Table S5.</b> | The electronic energy and the number of imaginary frequencies with their corresponding intensities of optimized structures for reaction I.   | S16      |
| <b>Table S6.</b> | The electronic energy and the number of imaginary frequencies with their corresponding intensities of optimized structures for reaction II.  | S17      |
| <b>Table S7.</b> | The electronic energy and the number of imaginary frequencies with their corresponding intensities of optimized structures for reaction III. | S17      |
| <b>S1.</b>       | The cartesian coordinates of key structures.                                                                                                 | S18-S134 |

For reaction I, we have re-optimized all the species in the preferred pathway PA3 using Minnesota M06 functional with the same basis set (Figure S1, pink line). The calculating results showed that the activation energies difference of transition states **TS4a/TS5a/TS6a** and **TS4a'/TS5a'/TS6a'** is 1.3/1.1/0.4 kcal/mol.

For reaction II, we also calculated the key transition states and intermediates in pathways PB3 (Figure S3, red line). The energy difference between **TS1b/TS5b/TS6b/TS7b** and **TS1b'/TS5b'/TS6b'/TS7b'** is 1.5/1.4/0.5/0.2 kcal/mol.

Thereby, the relatively small activation energy barrier difference indicates that our results based on B3LYP-D3 functional and a mixed basis set of SDD basis set for Pd and 6-311+G(d,p) for other atoms is reasonable.

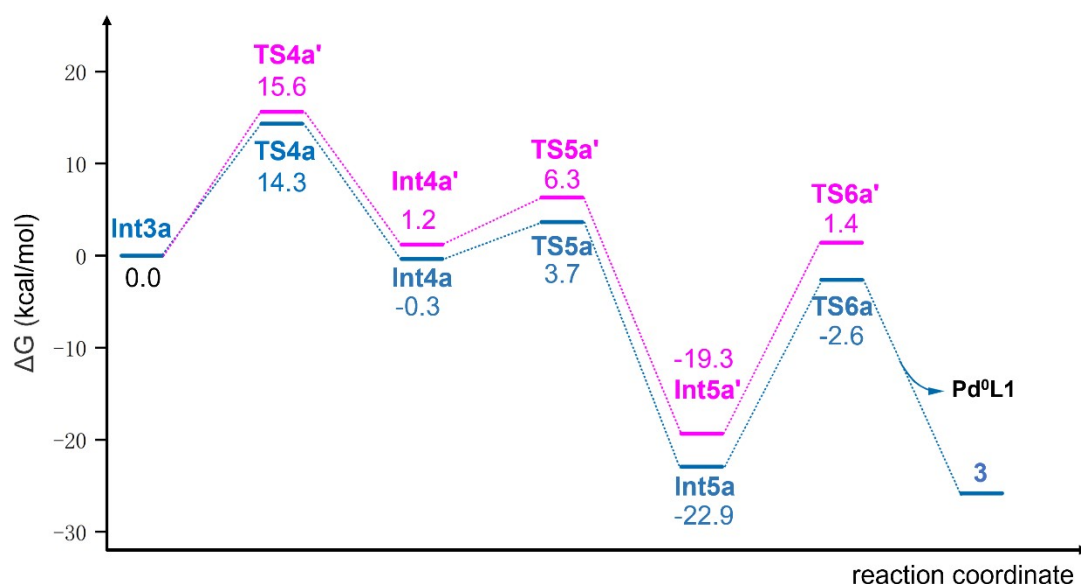

**Figure S1.** Energy profiles for the key structures in the most preferred pathway PA3 calculated by M06 functional (blue line) and B3LYP-D3 functional (pink line), free energies are given in kcal/mol.

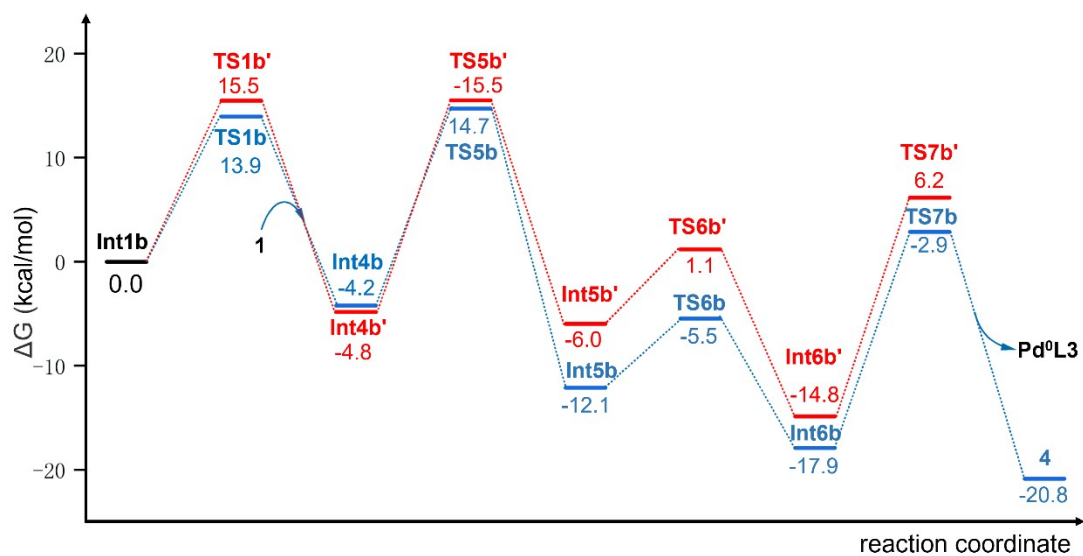

**Figure S2.** Energy profiles for the key structures in the most preferred pathway PB3 calculated by M06 functional (blue line) and B3LYP-D3 functional (pink line), free energies are given in kcal/mol.

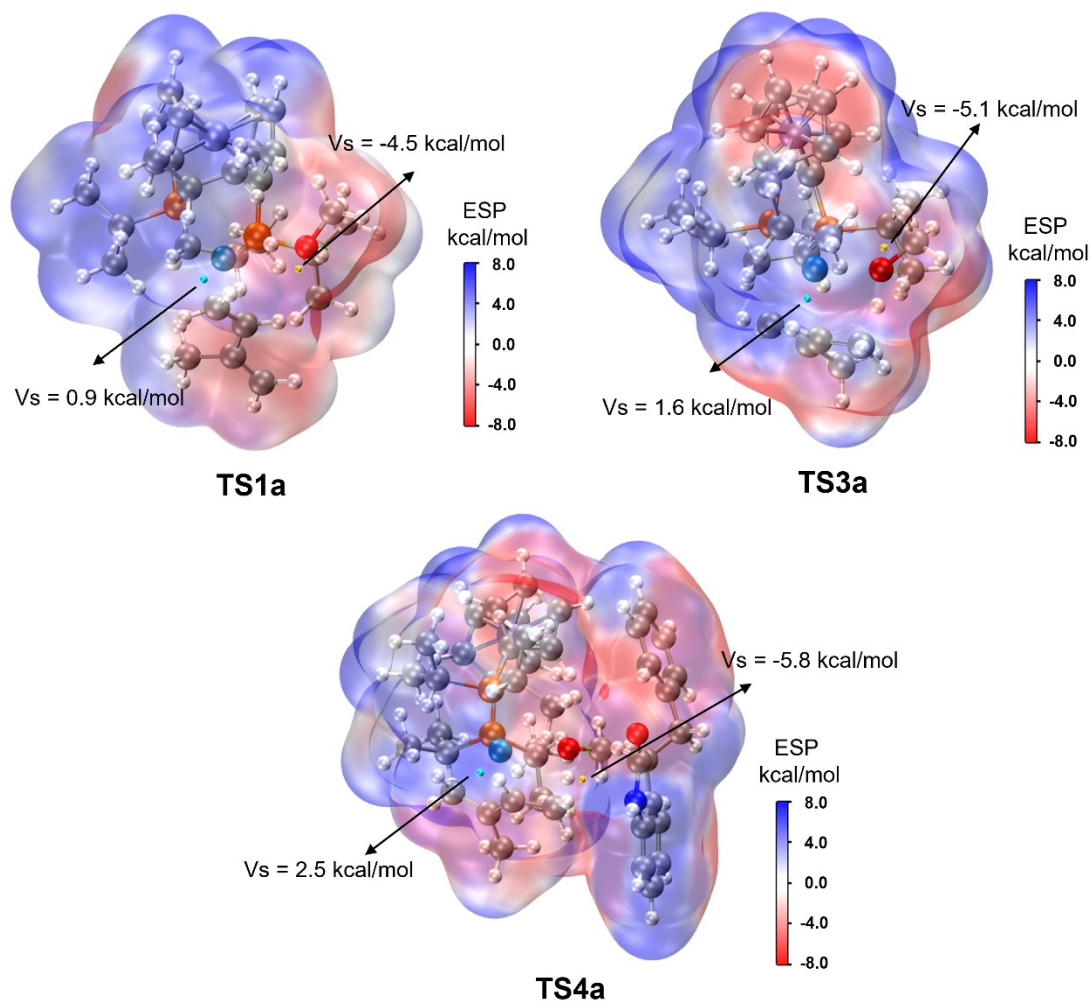

**Figure S3.** Electrostatic potentials on the monomers' van der Waals surface of **TS1a**, **TS3a**, and **TS4a** (red = -8 kcal/mol; blue = +8 kcal/mol).

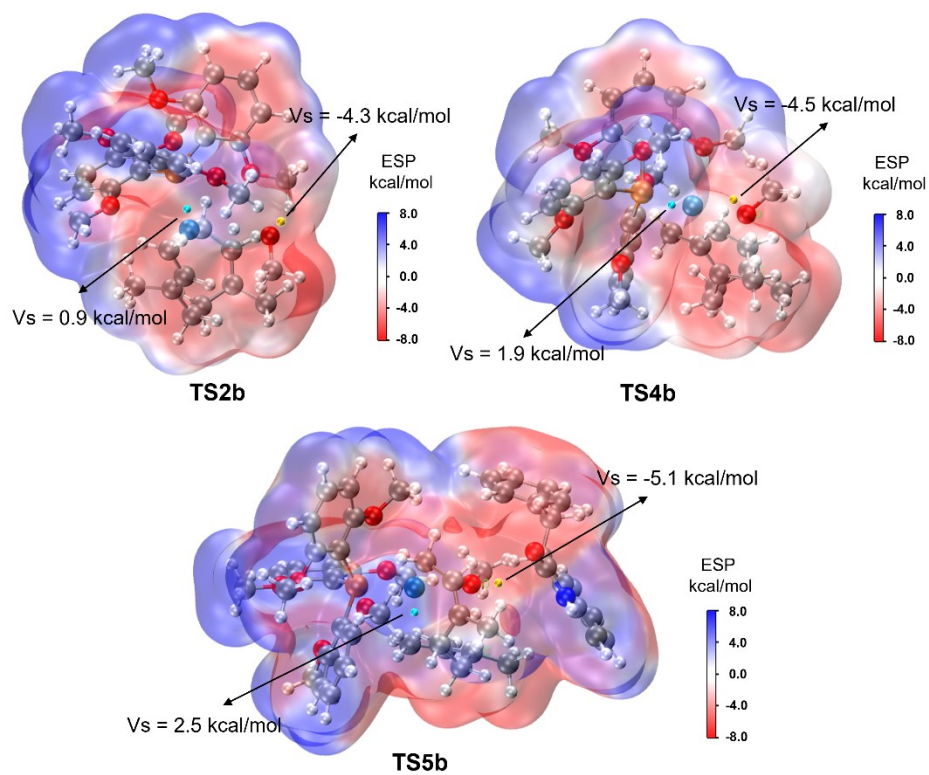

**Figure S4.** Electrostatic potentials on the monomers' van der Waals surface of **TS2b**, **TS4b**, and **TS5b** (red = -8 kcal/mol; blue = +8 kcal/mol).

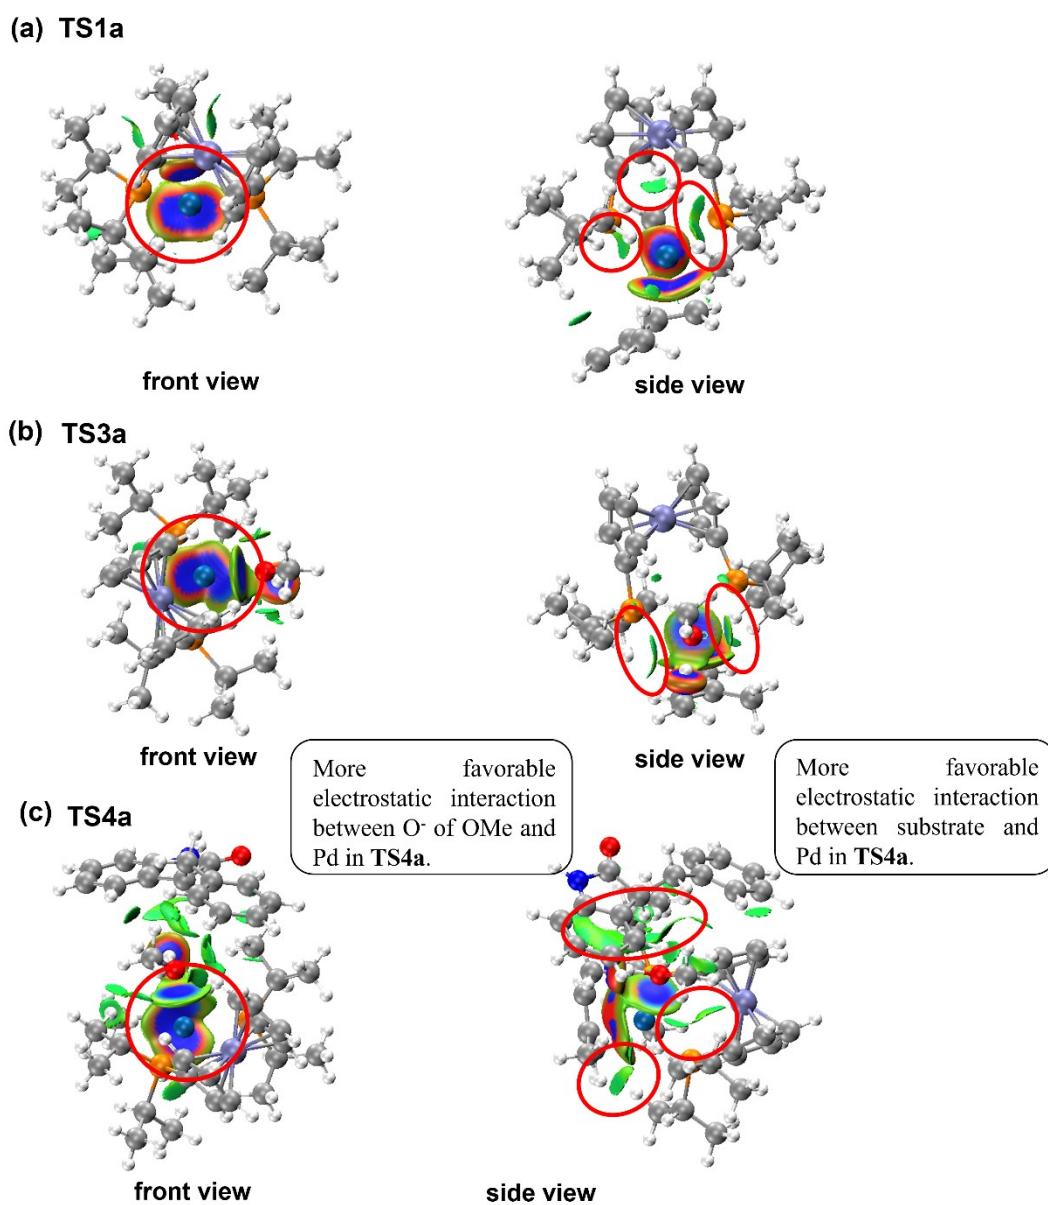

**Figure S5.** Noncovalent interaction analysis (blue, strong attraction; green, weak interaction) for the front view and side view of transition states **TS1a**, **TS3a**, and **TS4a**.

(a) front view

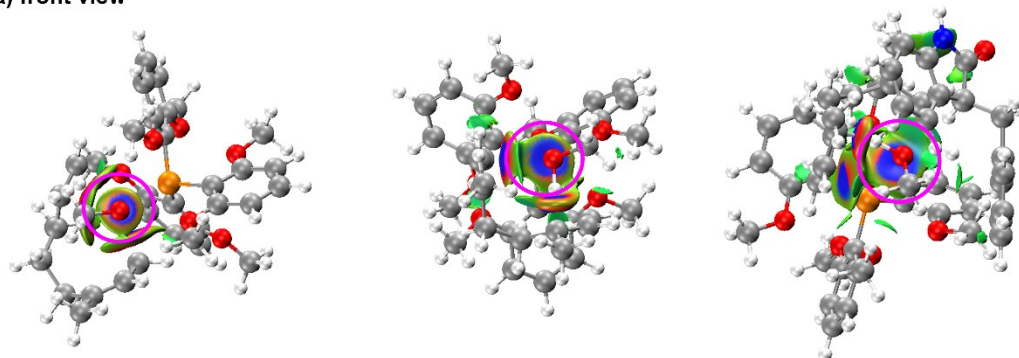

TS2b

TS4b

TS5b

(b) side view

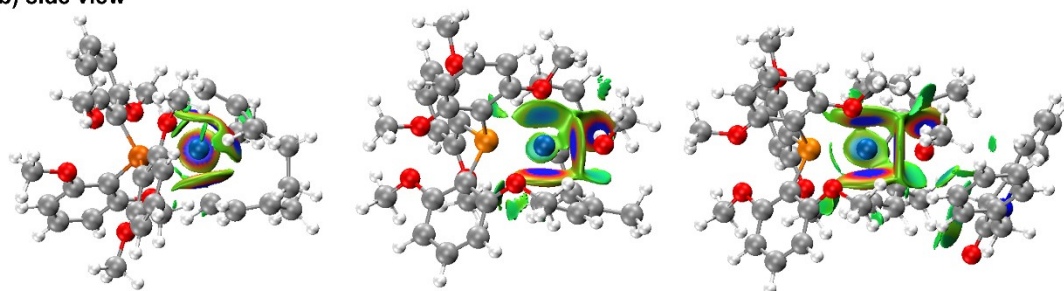

TS2b

TS4b

TS5b

**Figure S6.** Noncovalent interaction analysis (blue, strong attraction; green, weak interaction) for the front view and side view of transition states **TS2b**, **TS4b**, and **TS5b**.



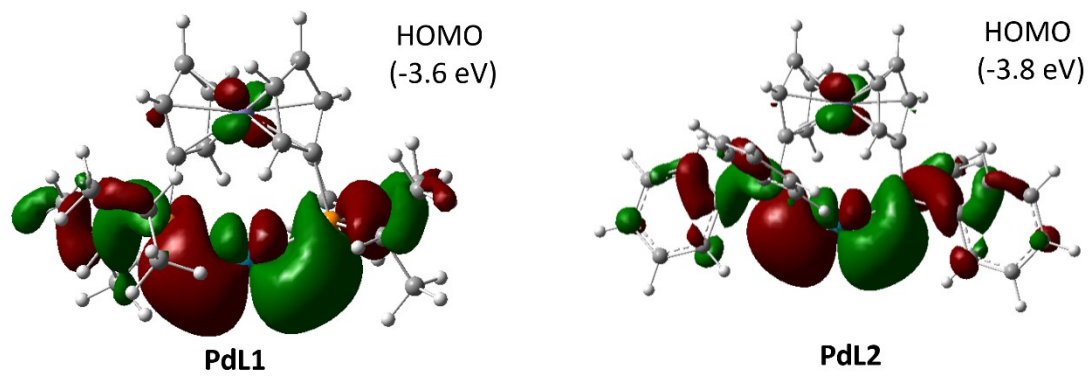

**Figure S7.** FMO analysis for PdL1 and PdL2.

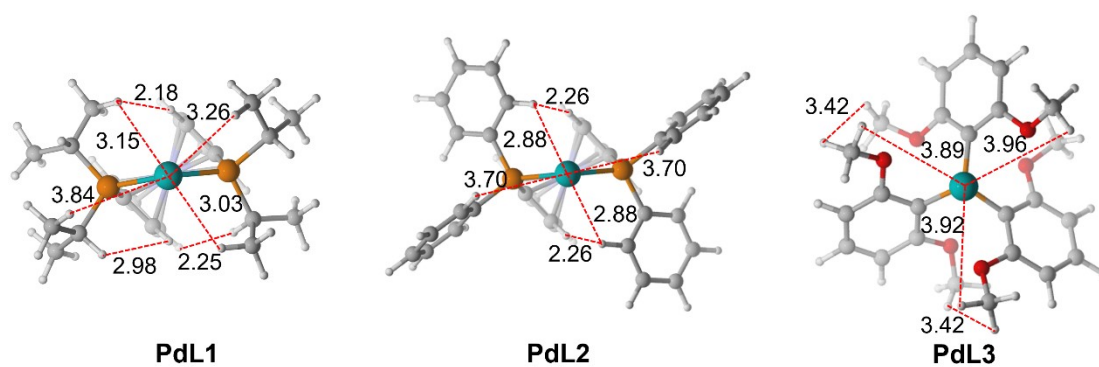

**Figure S8.** The structures for PdL1, PdL2, and PdL3. The distances are in Å.

**Table S1.** Estimation of Noncovalent Interaction Energies ( $E_{\text{HB}}$ ) Using Espinosa Equation ( $E_{\text{HB}} = 1/2V(r_{\text{cp}})$ ) in the Lower Energy Enantioccontrolling **TS1a**, **TS4a**, **TS4a**.

| Noncovalent Interaction | Bond path | Distance d/Å | $\rho$ | $\nabla^2\rho$ | G     | $V=1/4\nabla^2\rho$<br>-2G | $E=1/2 V$<br>(kcal/mol) |
|-------------------------|-----------|--------------|--------|----------------|-------|----------------------------|-------------------------|
| <b>TS1a</b>             |           |              |        |                |       |                            |                         |
| N-H $\cdots$ O          | 1a        | 2.40         | 0.012  | -0.012         | 0.010 | -0.02                      | -7.2                    |
| C-H $\cdots$ O          | 1b        | 2.48         | 0.011  | -0.010         | 0.009 | -0.02                      | -6.4                    |
|                         |           |              |        |                |       |                            | -13.6                   |
| <b>TS3a</b>             |           |              |        |                |       |                            |                         |
| N-H $\cdots$ O          | 2a        | 2.25         | 0.015  | -0.014         | 0.012 | -0.0275                    | -8.6                    |
| C-H $\cdots$ O          | 2b        | 2.49         | 0.011  | -0.01          | 0.008 | -0.0185                    | -5.8                    |
|                         |           |              |        |                |       |                            | -14.4                   |
| <b>TS4a</b>             |           |              |        |                |       |                            |                         |
| C-H $\cdots$ O          | 3a        | 2.44         | 0.013  | -0.013         | 0.012 | -0.02725                   | -8.5                    |
|                         | 3b        | 2.54         | 0.008  | -0.008         | 0.007 | -0.0205                    | -6.4                    |
| C-H $\cdots\pi$         | 3c        | 2.72         | 0.008  | -0.007         | 0.006 | -0.01375                   | -4.3                    |
|                         | 3d        | 2.74         | 0.008  | -0.007         | 0.006 | -0.01375                   | -4.3                    |
|                         |           |              |        |                |       |                            | -23.6                   |

**Table S2.** The second-order perturbation stabilization energies ( $E(2)$ , kcal/mol) for transition states **TS1a**, **TS2a**, **TS4a**, and **PB3-TS5b-L1** between the Pd centre and the coordination atoms (P, O, and C).

| TSs                                                     | donor                                                   | acceptor   | interaction              | $E(2)$ |
|---------------------------------------------------------|---------------------------------------------------------|------------|--------------------------|--------|
| <b>TS4a</b>                                             |                                                         |            |                          |        |
|                                                         | LP P1                                                   | LP* Pd     | $n \rightarrow d^*$      | 102.1  |
|                                                         | LP P2                                                   | LP* Pd     | $n \rightarrow d^*$      | 92.3   |
|                                                         | P1/P2...Pd                                              |            |                          | 194.4  |
|                                                         | LP Pd                                                   | LP* C4     | $d \rightarrow n^*$      | 79.1   |
|                                                         | BD C2-C3                                                | LP* Pd     | $\pi \rightarrow d^*$    | 13.7   |
|                                                         | BD C4-C3                                                | LP* Pd     | $\pi \rightarrow d^*$    | 17.3   |
|                                                         | C2/C3/C4...Pd                                           |            |                          | 110.1  |
|                                                         | BD C8-O1                                                | LP* Pd     | $\sigma \rightarrow d^*$ | 6.5    |
|                                                         | LP O1                                                   | LP* Pd     | $n \rightarrow d^*$      | 42.0   |
|                                                         | O1...Pd                                                 |            |                          | 48.5   |
|                                                         | LP O1                                                   | BD* C8'-H2 | $n \rightarrow \sigma^*$ | 4.5    |
|                                                         | $E(2)$ for Pd...O (MeO <sup>-</sup> )/Pd...C=C (olefin) |            |                          |        |
| <b>TS3a</b>                                             |                                                         |            |                          |        |
|                                                         | LP P1                                                   | LP* Pd     | $n \rightarrow d^*$      | 118.3  |
|                                                         | LP P2                                                   | LP* Pd     | $n \rightarrow d^*$      | 112.8  |
|                                                         | P1/P2...Pd                                              |            |                          | 231.1  |
|                                                         | LP Pd                                                   | BD* C3-C4  | $d \rightarrow \pi^*$    | 18.1   |
|                                                         | BD C3-C4                                                | LP* Pd     | $\pi \rightarrow d^*$    | 11.6   |
|                                                         | C3/C4...Pd                                              |            |                          | 29.7   |
|                                                         | BD C8-O1                                                | LP* Pd     | $\sigma \rightarrow d^*$ | 6.4    |
|                                                         | LP O1                                                   | LP* Pd     | $n \rightarrow d^*$      | 47.1   |
| O1...Pd                                                 |                                                         |            | 53.5                     |        |
| $E(2)$ for Pd...O (MeO <sup>-</sup> )/Pd...C=C (olefin) |                                                         |            |                          | 71.6   |
| <b>TS1a</b>                                             |                                                         |            |                          |        |
|                                                         | LP P1                                                   | LP* Pd     | $n \rightarrow d^*$      | 126.6  |
|                                                         | LP P2                                                   | LP* Pd     | $n \rightarrow d^*$      | 122.8  |
|                                                         | P1/P2...Pd                                              |            |                          | 249.4  |
|                                                         | BD C1-C2                                                | LP Pd      | $\pi \rightarrow d^*$    | 56.8   |
|                                                         | LP Pd                                                   | BD* C1-C2  | $d \rightarrow \pi^*$    | 24.4   |
|                                                         | C1/C2...Pd                                              |            |                          | 81.2   |
| $E(2)$ for Pd...C=C (olefin)                            |                                                         |            |                          | 24.4   |

**Table S3.** The second-order perturbation stabilization energies ( $E(2)$ , kcal/mol) for transition states **TS5b**, **TS2b**, and **TS3b** between the Pd centre and the coordination atoms (P, O, and C).

| TSs                                                   | donor              | acceptor   | interaction              | $E(2)$ |
|-------------------------------------------------------|--------------------|------------|--------------------------|--------|
| <b>TS5b</b>                                           |                    |            |                          |        |
|                                                       | LP P               | LP* Pd     | $n \rightarrow d^*$      | 66.6   |
|                                                       | LP P               | LP* Pd     | $n \rightarrow d^*$      | 53.4   |
|                                                       | P...Pd             |            |                          | 120    |
|                                                       | BD C1'-C2'         | LP* Pd     | $\pi \rightarrow d^*$    | 18.8   |
|                                                       | BD C1-C2           | LP* Pd     | $\sigma \rightarrow d^*$ | 29.1   |
|                                                       | C1-C2/C1'-C2'...Pd |            |                          | 47.9   |
|                                                       | LP O1              | LP*Pd      | $n \rightarrow d^*$      | 25.1   |
|                                                       | O1...Pd            |            |                          | 25.1   |
|                                                       | LP O1              | BD* C11-H2 | $n \rightarrow \sigma^*$ | 81.1   |
| E(2) for Pd...O (MeO <sup>-</sup> )/Pd...C=C (olefin) |                    |            |                          | 73.0   |
| <b>TS4b</b>                                           |                    |            |                          |        |
|                                                       | LP P               | LP* Pd     | $n \rightarrow d^*$      | 92.7   |
|                                                       | P...Pd             |            |                          | 92.7   |
|                                                       | BD C1-C2           | LP* Pd     | $\pi \rightarrow d^*$    | 18.3   |
|                                                       | BD C1'-C2'         | LP* Pd     | $\pi \rightarrow d^*$    | 5.5    |
|                                                       | C1-C2/C1'-C2'...Pd |            |                          | 23.8   |
|                                                       | LP O1              | LP* Pd     | $n \rightarrow d^*$      | 22.6   |
|                                                       | O1...Pd            |            |                          | 22.6   |
| E(2) for Pd...O(MeO <sup>-</sup> )/Pd...C=C(olefin)   |                    |            |                          | 46.4   |
| <b>TS2b</b>                                           |                    |            |                          |        |
|                                                       | LP P               | LP* Pd     | $n \rightarrow d^*$      | 53.6   |
|                                                       | P...Pd             |            |                          | 53.6   |
|                                                       | BD C1-C2           | LP* Pd     | $\pi \rightarrow d^*$    | 19.2   |
|                                                       | BD C1'-C2'         | LP* Pd     | $\pi \rightarrow d^*$    | 5.9    |
|                                                       | C1-C2/C1'-C2'...Pd |            |                          | 25.1   |
|                                                       | Pd...C=C (olefin)  |            |                          |        |

**Table S4.** Estimation of Noncovalent Interaction Energies ( $E$ , in kcal/mol) Using Espinosa Equation ( $E = 1/2V(r_{cp})$ ) in **TS4b**, and **TS5b**.

| Noncovalent Interaction | Bond path | Distance d/Å | $\rho$ | $\nabla^2\rho$ | G     | $V=1/4\nabla^2\rho - 2G$ | $E=1/2 V$ (kcal/mol) |
|-------------------------|-----------|--------------|--------|----------------|-------|--------------------------|----------------------|
| <b>TS4b</b>             |           |              |        |                |       |                          |                      |
| C–H···O                 | 4a        | 2.14         | 0.018  | -0.016         | 0.013 | -0.03                    | -9.4                 |
| C–H···O                 | 4b        | 2.23         | 0.015  | -0.014         | 0.012 | -0.03                    | -8.6                 |
| C–H···O                 | 4c        | 2.45         | 0.010  | -0.009         | 0.008 | -0.02                    | -5.7                 |
| C–H···O                 | 4d        | 2.46         | 0.010  | -0.008         | 0.007 | -0.02                    | -5.0                 |
|                         |           |              |        |                |       |                          | -28.7                |
| <b>TS4b</b>             |           |              |        |                |       |                          |                      |
| N–H···O                 | 5a        | 2.30         | 0.015  | -0.015         | 0.013 | -0.03                    | -9.3                 |
| C–H···O                 | 5b        | 2.50         | 0.012  | -0.011         | 0.009 | -0.02                    | -6.5                 |
|                         | 5c        | 2.56         | 0.009  | -0.008         | 0.008 | -0.02                    | -5.6                 |
|                         |           |              |        |                |       |                          | -21.5                |
| <b>TS5b</b>             |           |              |        |                |       |                          |                      |
| C–H···O                 | 6a        | 2.24         | 0.014  | -0.012         | 0.011 | -0.025                   | -7.8                 |
|                         | 6b        | 2.57         | 0.009  | -0.008         | 0.007 | -0.016                   | -5.0                 |
|                         | 6c        | 2.52         | 0.011  | -0.010         | 0.009 | -0.020                   | -6.4                 |
| C–H··· $\pi$            | 6d        | 2.64         | 0.010  | -0.009         | 0.008 | -0.018                   | -5.7                 |
|                         | 6e        | 2.74         | 0.008  | -0.007         | 0.006 | -0.013                   | -4.3                 |
|                         | 6f        | 2.70         | 0.008  | -0.007         | 0.005 | -0.011                   | -3.6                 |
|                         | 6g        | 2.97         | 0.006  | -0.005         | 0.004 | -0.025                   | -7.8                 |
|                         |           |              |        |                |       |                          | -33.0                |

**Table S5.** The electronic energy and the number of imaginary frequencies with their corresponding intensities of optimized structures for reaction I.

| Stationary Points | E (SCF)      | G_correction | Number of imaginary frequencies | Imaginary frequency(cm <sup>-1</sup> ) |
|-------------------|--------------|--------------|---------------------------------|----------------------------------------|
| <b>Int1a</b>      | -2106.327794 | 0.615485     | 0                               | \                                      |
| <b>TS1a</b>       | -2106.261346 | 0.612599     | 1                               | -812.41                                |
| <b>Int2a</b>      | -2106.282451 | 0.613282     | 0                               | \                                      |
| <b>TS2a</b>       | -2106.253944 | 0.612829     | 1                               | -116.97                                |
| <b>TS3a</b>       | -2106.264817 | 0.611461     | 1                               | -1080.13                               |
| <b>Int3a</b>      | -2816.002306 | 0.835601     | 0                               | \                                      |
| <b>TS4a</b>       | -2815.97935  | 0.835502     | 1                               | -1192.53                               |
| <b>Int4a</b>      | -2816.006199 | 0.838948     | 0                               | \                                      |
| <b>TS5a</b>       | -2815.997958 | 0.837086     | 1                               | -815.18                                |
| <b>Int5a</b>      | -2816.046542 | 0.843293     | 0                               | \                                      |
| <b>TS6a</b>       | -2816.01437  | 0.843498     | 1                               | -169.57                                |
| <b>3</b>          | -905.121979  | 0.302726     | 0                               | \                                      |

**Table S6.** The electronic energy and the number of imaginary frequencies with their corresponding intensities of optimized structures for reaction II.

| Stationary Points | E (SCF)      | G_correction | Number of imaginary frequencies | Imaginary frequency( $\text{cm}^{-1}$ ) |
|-------------------|--------------|--------------|---------------------------------|-----------------------------------------|
| <b>Int1b</b>      | -2358.578593 | 0.653701     | 0                               | \                                       |
| <b>TS1b</b>       | -2358.557359 | 0.654714     | 1                               | -169.57                                 |
| <b>Int2b</b>      | -2358.586111 | 0.658622     | 0                               | \                                       |
| <b>TS2b</b>       | -2358.522145 | 0.65264      | 1                               | -1027.07                                |
| <b>Int3b</b>      | -2358.523917 | 0.653265     | 0                               | \                                       |
| <b>TS3b</b>       | -2358.51208  | 0.654565     | 1                               | -744.10                                 |
| <b>TS4b</b>       | -2358.522353 | 0.651539     | 1                               | -576.17                                 |
| <b>Int4b</b>      | -3068.281517 | 0.878188     | 0                               | \                                       |
| <b>TS5b</b>       | -3068.248803 | 0.875683     | 1                               | -929.54                                 |
| <b>Int5b</b>      | -3068.294559 | 0.878683     | 0                               | \                                       |
| <b>TS6b</b>       | -3068.28352  | 0.878245     | 1                               | -835.39                                 |
| <b>Int6b</b>      | -3068.301257 | 0.876165     | 0                               | \                                       |
| <b>TS7b</b>       | -3068.26618  | 0.874166     | 1                               | -130.65                                 |
| <b>4</b>          | -1100.536064 | 0.41002      | 0                               | \                                       |

**Table S7.** The electronic energy and the number of imaginary frequencies with their corresponding intensities of optimized structures for reaction III.

| Stationary Points  | E (SCF)      | G_correction | Number of imaginary frequencies | Imaginary frequency( $\text{cm}^{-1}$ ) |
|--------------------|--------------|--------------|---------------------------------|-----------------------------------------|
| <b>PB3-TS5b-L1</b> | -3011.378082 | 0.943181     | 1                               | -600.43                                 |
| <b>PA3-TS4a-L3</b> | -2872.86015  | 0.764286     | 1                               | -1149.63                                |
| <b>Int1c</b>       | -3268.61851  | 0.812701     | 0                               | \                                       |
| <b>TS1c</b>        | -3268.581891 | 0.812598     | 1                               | -1052.19                                |
| <b>Int2c</b>       | -3268.61335  | 0.816197     | 0                               | \                                       |
| <b>TS2c</b>        | -3268.597451 | 0.81011      | 1                               | -287.71                                 |
| <b>Int3c</b>       | -3268.641592 | 0.807563     | 0                               | \                                       |
| <b>TS3c</b>        | -3268.610791 | 0.80868      | 1                               | 149.7996                                |

## S1. The cartesian coordinates of key structures.

### Int1a

|    |            |             |             |
|----|------------|-------------|-------------|
| C  | 2.58574700 | -2.71205800 | 1.46141700  |
| C  | 2.60342500 | -3.42556100 | 0.21653300  |
| C  | 1.39503300 | -3.11055300 | -0.49358700 |
| C  | 0.61790100 | -2.19398400 | 0.30586400  |
| C  | 1.37214300 | -1.95031300 | 1.51425800  |
| H  | 3.38273400 | -2.69679800 | 2.20158000  |
| H  | 3.41824900 | -4.04292400 | -0.15647300 |
| H  | 1.13904900 | -3.46164100 | -1.48834000 |
| H  | 1.07258600 | -1.26856200 | 2.30451200  |
| Fe | 2.46502800 | -1.41566800 | -0.11554100 |
| C  | 2.37477500 | -0.12908000 | -1.67939400 |
| C  | 3.56300600 | -0.92748700 | -1.76709900 |
| C  | 2.39853700 | 0.60495600  | -0.43356800 |
| H  | 1.55898800 | -0.11297700 | -2.39489800 |
| C  | 4.32806700 | -0.70955400 | -0.57314800 |
| H  | 3.80525400 | -1.62734100 | -2.56385900 |
| C  | 3.61674300 | 0.23143600  | 0.24570800  |
| H  | 5.25091600 | -1.21857300 | -0.30223700 |
| H  | 3.92078600 | 0.56141900  | 1.23389400  |
| C  | 1.49323300 | 2.51014700  | 1.66749400  |
| C  | 2.78993100 | 3.33926000  | 1.73705100  |
| C  | 1.43764500 | 1.43400300  | 2.77156600  |
| H  | 0.64274400 | 3.19505300  | 1.83333400  |
| H  | 2.73910100 | 4.22060900  | 1.08133000  |
| H  | 2.94326300 | 3.69506200  | 2.77076600  |
| H  | 3.67077600 | 2.74738500  | 1.44763200  |
| H  | 0.46194600 | 0.92624300  | 2.78562900  |
| H  | 2.22342100 | 0.67794000  | 2.62867100  |



|   |             |             |             |
|---|-------------|-------------|-------------|
| H | 1.59423700  | 1.90850900  | 3.75536700  |
| C | 1.32535900  | 3.15067300  | -1.25032900 |
| C | 0.46048300  | 2.89254500  | -2.50113200 |
| C | 2.78998400  | 3.38530200  | -1.67238600 |
| H | 0.93780900  | 4.04769300  | -0.73408200 |
| H | -0.58981300 | 2.71725400  | -2.23173100 |
| H | 0.52208200  | 3.75345400  | -3.18914000 |
| H | 0.82769700  | 2.00539200  | -3.04299300 |
| H | 3.45953900  | 3.55817200  | -0.82015400 |
| H | 3.16733600  | 2.50978400  | -2.22266100 |
| H | 2.84662100  | 4.26041900  | -2.34297800 |
| C | -1.69310100 | -2.04186700 | -1.57304300 |
| C | -1.89739600 | -3.56016900 | -1.73514800 |
| C | -0.83652100 | -1.45818300 | -2.71711200 |
| H | -2.67935100 | -1.54774600 | -1.61363700 |
| H | -2.69085100 | -3.92820300 | -1.07025700 |
| H | -2.19762100 | -3.78437900 | -2.77398700 |
| H | -0.97929400 | -4.12491700 | -1.51586100 |
| H | -0.71528300 | -0.37074700 | -2.59491300 |
| H | 0.16580400  | -1.91180800 | -2.73692900 |
| H | -1.32433200 | -1.65311900 | -3.68714500 |
| C | -2.00425000 | -2.28555400 | 1.43547800  |
| C | -1.67362000 | -3.76878300 | 1.69229300  |
| C | -3.50893400 | -2.05296100 | 1.21395300  |
| H | -1.71238800 | -1.71804600 | 2.33323100  |
| H | -0.59905500 | -3.91646200 | 1.87444700  |
| H | -2.22466800 | -4.10897200 | 2.58631000  |
| H | -1.97019400 | -4.41050000 | 0.85103200  |
| H | -3.72394700 | -0.98541600 | 1.07811000  |
| H | -3.87239500 | -2.59108700 | 0.32439200  |

|    |             |             |             |
|----|-------------|-------------|-------------|
| H  | -4.07275500 | -2.41718800 | 2.08888100  |
| P  | 1.04390500  | 1.75078900  | 0.00388100  |
| P  | -1.02095500 | -1.41935100 | 0.06747600  |
| Pd | -1.13623900 | 0.92406600  | 0.01658200  |
| C  | -3.28660300 | 1.54869100  | -0.02366200 |
| H  | -3.73701500 | 1.25382200  | 0.92943500  |
| C  | -3.94976200 | 1.00880700  | -1.22653900 |
| C  | -5.02140000 | 0.18326800  | -1.14095600 |
| H  | -5.44399900 | -0.10336100 | -0.17550300 |
| H  | -5.50152100 | -0.21685700 | -2.03705400 |
| C  | -3.39079200 | 1.40942000  | -2.57852200 |
| H  | -3.92070700 | 0.90003900  | -3.39758600 |
| H  | -3.47717100 | 2.49877700  | -2.73512100 |
| H  | -2.31803500 | 1.16437300  | -2.63824000 |
| O  | -1.93267600 | 0.60091100  | 3.08523600  |
| C  | -2.42130500 | 2.67787900  | -0.02668400 |
| H  | -1.74082100 | 0.60625300  | 2.11135800  |
| H  | -2.29356700 | 3.24981900  | 0.89629100  |
| H  | -2.26816900 | 3.24968600  | -0.94553700 |
| C  | -2.11729700 | 1.96055100  | 3.46703600  |
| H  | -1.20943600 | 2.56946000  | 3.28806000  |
| H  | -2.96481400 | 2.43088000  | 2.93268900  |
| H  | -2.33647100 | 1.96665000  | 4.54534500  |

**TS1a**

|   |             |            |             |
|---|-------------|------------|-------------|
| C | -2.30870500 | 2.73518400 | 1.40520100  |
| C | -2.36960700 | 3.46906400 | 0.17306000  |
| C | -1.22201800 | 3.11557600 | -0.61409200 |
| C | -0.43210200 | 2.16526200 | 0.13022700  |
| C | -1.12515900 | 1.91978100 | 1.37405200  |
| H | -3.05738300 | 2.74023500 | 2.19036700  |

|    |             |             |             |
|----|-------------|-------------|-------------|
| H  | -3.18043500 | 4.11819600  | -0.14286500 |
| H  | -1.00453500 | 3.47260100  | -1.61490700 |
| H  | -0.81508500 | 1.20339400  | 2.12159000  |
| Fe | -2.33584400 | 1.46148800  | -0.18427300 |
| C  | -2.40479500 | 0.09627600  | -1.68625400 |
| C  | -3.52528300 | 0.98490000  | -1.77543300 |
| C  | -2.43766600 | -0.57120600 | -0.40552100 |
| H  | -1.63864800 | -0.04691700 | -2.44071700 |
| C  | -4.25745800 | 0.89078500  | -0.54571600 |
| H  | -3.74622400 | 1.65505200  | -2.60318800 |
| C  | -3.59233600 | -0.06356800 | 0.29770800  |
| H  | -5.12532500 | 1.48627700  | -0.26939400 |
| H  | -3.87988800 | -0.31496500 | 1.31389600  |
| C  | -1.71706400 | -2.58954900 | 1.65055800  |
| C  | -3.09902600 | -3.26752200 | 1.59041900  |
| C  | -1.57124400 | -1.61994100 | 2.83917900  |
| H  | -0.95463100 | -3.37855800 | 1.78010400  |
| H  | -3.11344400 | -4.07971500 | 0.84889000  |
| H  | -3.33746200 | -3.70314500 | 2.57600300  |
| H  | -3.89520800 | -2.55416900 | 1.33155500  |
| H  | -0.51707800 | -1.33715500 | 2.96380500  |
| H  | -2.17012300 | -0.70731800 | 2.69644000  |
| H  | -1.91324600 | -2.11135200 | 3.76592900  |
| C  | -1.33532100 | -3.14221000 | -1.21894100 |
| C  | -0.26020900 | -3.00322000 | -2.31406400 |
| C  | -2.73466400 | -3.25854700 | -1.85390700 |
| H  | -1.12354200 | -4.05805800 | -0.63851500 |
| H  | 0.74769400  | -2.96405200 | -1.87809000 |
| H  | -0.31592700 | -3.85464500 | -3.01458500 |
| H  | -0.41619300 | -2.07979000 | -2.89605100 |

|    |             |             |             |
|----|-------------|-------------|-------------|
| H  | -3.53560400 | -3.30512200 | -1.10418700 |
| H  | -2.93448300 | -2.39030700 | -2.49973400 |
| H  | -2.78371100 | -4.16763200 | -2.47798300 |
| C  | 1.60736100  | 1.88375000  | -1.98100800 |
| C  | 0.71200700  | 1.16597400  | -3.01156500 |
| H  | 2.62355400  | 1.47808300  | -2.09408500 |
| H  | 0.67920200  | 0.08101900  | -2.82273100 |
| H  | -0.31397300 | 1.55665600  | -2.96564300 |
| H  | 1.09911800  | 1.33554800  | -4.02813300 |
| C  | 2.40507400  | 2.18964500  | 0.89802300  |
| C  | 2.02847100  | 3.59365400  | 1.39407300  |
| C  | 3.79964000  | 2.17396100  | 0.24846000  |
| H  | 2.43641100  | 1.49742700  | 1.74971400  |
| H  | 1.02823400  | 3.61255700  | 1.85443100  |
| H  | 2.76365300  | 3.92245200  | 2.15323000  |
| H  | 2.04235600  | 4.32899700  | 0.57334200  |
| H  | 4.06623600  | 1.17538700  | -0.12910000 |
| H  | 3.86167300  | 2.89474700  | -0.58352500 |
| H  | 4.55348900  | 2.46841700  | 0.99808900  |
| P  | -1.13204200 | -1.75787100 | 0.07123100  |
| P  | 1.15473700  | 1.33634900  | -0.24251300 |
| Pd | 1.09273500  | -0.96756400 | 0.16721000  |
| C  | 3.18628600  | -1.79288500 | 0.54000900  |
| H  | 3.53419800  | -1.29006400 | 1.44572900  |
| C  | 4.04008300  | -1.63559500 | -0.65202400 |
| C  | 5.25691100  | -1.04636100 | -0.56442100 |
| H  | 5.63873500  | -0.67732600 | 0.39067700  |
| H  | 5.89601200  | -0.92479400 | -1.44232400 |
| C  | 3.51875800  | -2.14875500 | -1.97984900 |
| H  | 4.25491300  | -2.00035900 | -2.78463100 |

|   |             |             |             |
|---|-------------|-------------|-------------|
| H | 3.27546500  | -3.22392300 | -1.92795400 |
| H | 2.58505600  | -1.62523800 | -2.24976800 |
| O | 1.69742400  | -0.41962200 | 3.13589600  |
| C | 2.19757700  | -2.79253100 | 0.69405100  |
| H | 1.22762700  | -0.51424700 | 1.87466700  |
| H | 1.88827800  | -3.07092700 | 1.70420900  |
| H | 2.04370200  | -3.54984600 | -0.08063200 |
| C | 1.05177800  | 0.60946200  | 3.85105500  |
| H | 1.12336800  | 1.60722800  | 3.37274300  |
| H | -0.02721200 | 0.41277400  | 4.04367000  |
| H | 1.54751500  | 0.68493500  | 4.83757500  |
| C | 1.65771900  | 3.42554300  | -2.22242500 |
| H | 2.72526600  | 3.78335200  | -2.27632100 |
| H | 1.15134600  | 3.68168300  | -3.19847400 |
| H | 1.13851200  | 4.00009200  | -1.40678000 |

**Int2a**

|    |            |             |             |
|----|------------|-------------|-------------|
| C  | 3.67339100 | 0.43258900  | 1.34936800  |
| C  | 4.32151200 | 0.19796500  | 0.08982700  |
| C  | 3.43219500 | -0.57772000 | -0.72987300 |
| C  | 2.22365400 | -0.82029300 | 0.02643000  |
| C  | 2.38289400 | -0.18779400 | 1.31746900  |
| H  | 4.06508800 | 1.04048100  | 2.16200600  |
| H  | 5.28583400 | 0.59593000  | -0.22023200 |
| H  | 3.61634900 | -0.87064600 | -1.75908200 |
| H  | 1.61155500 | -0.19517400 | 2.08963000  |
| Fe | 2.54794700 | 1.16665500  | -0.20058800 |
| C  | 1.36125000 | 1.88233600  | -1.66653400 |
| C  | 2.66139700 | 2.47817000  | -1.76440600 |
| C  | 0.80777000 | 2.18527200  | -0.36419000 |
| H  | 0.88188500 | 1.27057900  | -2.42130100 |

|   |             |             |             |
|---|-------------|-------------|-------------|
| C | 2.92870900  | 3.15400300  | -0.52855200 |
| H | 3.34743800  | 2.37861100  | -2.60268700 |
| C | 1.79105300  | 2.98399800  | 0.32977300  |
| H | 3.85713500  | 3.65240900  | -0.25814300 |
| H | 1.71465000  | 3.34665500  | 1.34838400  |
| C | -1.28669200 | 2.52413900  | 1.72371100  |
| C | -1.36072400 | 4.05952400  | 1.62555500  |
| C | -0.40131300 | 2.06116300  | 2.89929800  |
| H | -2.30439800 | 2.14306400  | 1.91833600  |
| H | -2.15483100 | 4.39337900  | 0.94121900  |
| H | -1.57953400 | 4.47304500  | 2.62502100  |
| H | -0.40535400 | 4.48677700  | 1.28408200  |
| H | -0.29555200 | 0.96062200  | 2.91089700  |
| H | 0.60268800  | 2.50799200  | 2.84249000  |
| H | -0.85975600 | 2.40246300  | 3.84325200  |
| C | -1.93044000 | 2.41061000  | -1.18671600 |
| C | -2.16237700 | 1.42890300  | -2.35289400 |
| C | -1.42401100 | 3.75902400  | -1.74158500 |
| H | -2.88565200 | 2.58754900  | -0.66259500 |
| H | -2.42786900 | 0.42230800  | -2.00320000 |
| H | -2.96465800 | 1.80442200  | -3.01008700 |
| H | -1.24749600 | 1.34851200  | -2.96095200 |
| H | -1.20390900 | 4.49278800  | -0.95678200 |
| H | -0.50556800 | 3.60932200  | -2.32762900 |
| H | -2.19055900 | 4.18415700  | -2.41237500 |
| C | 0.80977100  | -2.46013900 | -2.06293700 |
| C | 2.01346700  | -3.35749600 | -2.41712200 |
| C | 0.66369800  | -1.30479600 | -3.06978700 |
| H | -0.10567700 | -3.07431500 | -2.11843200 |
| H | 2.03046700  | -4.27445100 | -1.81425100 |

|    |             |             |             |
|----|-------------|-------------|-------------|
| H  | 1.94921800  | -3.65009500 | -3.47971200 |
| H  | 2.96919100  | -2.83639500 | -2.26663600 |
| H  | -0.20556100 | -0.67656800 | -2.82505400 |
| H  | 1.56644500  | -0.67528700 | -3.06860200 |
| H  | 0.52964900  | -1.71003100 | -4.08687000 |
| C  | 1.04026500  | -3.30641100 | 0.83019700  |
| C  | 2.51389100  | -3.71599300 | 1.01631300  |
| C  | 0.16383000  | -4.50857600 | 0.43379200  |
| H  | 0.66583500  | -2.88269900 | 1.77785500  |
| H  | 3.12124800  | -2.87146900 | 1.37063100  |
| H  | 2.56622100  | -4.51709900 | 1.77364100  |
| H  | 2.96560400  | -4.10050900 | 0.08960400  |
| H  | -0.89281400 | -4.22112500 | 0.31036200  |
| H  | 0.50694600  | -4.97772100 | -0.50246000 |
| H  | 0.21507600  | -5.27189300 | 1.22786800  |
| P  | -0.84461600 | 1.59626100  | 0.14454200  |
| P  | 0.73725500  | -1.81918200 | -0.29722600 |
| Pd | -1.23135300 | -0.78537300 | 0.51672700  |
| C  | -4.38191900 | -0.91399000 | -1.05805400 |
| C  | -3.67257700 | -1.32706600 | 0.15484700  |
| C  | -3.34995900 | -0.51994400 | 1.25226200  |
| H  | -3.64171100 | 0.53248600  | 1.24259800  |
| H  | -3.20089600 | -0.96540700 | 2.23909900  |
| O  | -0.23663500 | -1.00416500 | 2.63551300  |
| C  | -4.51145900 | -1.77075700 | -2.10235300 |
| H  | -1.45878800 | -2.29250700 | 0.82766900  |
| H  | -5.07841200 | -1.49869400 | -2.99508400 |
| H  | -4.04534000 | -2.75941800 | -2.08282500 |
| C  | -1.09757900 | -1.34659800 | 3.66481000  |
| H  | -1.79870300 | -0.52003200 | 3.95890500  |

|   |             |             |             |
|---|-------------|-------------|-------------|
| H | -1.74608500 | -2.23055200 | 3.43237200  |
| H | -0.53218900 | -1.60825900 | 4.59094700  |
| H | -3.54292800 | -2.40543600 | 0.26480700  |
| C | -5.06771700 | 0.43708900  | -1.06883700 |
| H | -5.87996500 | 0.45671000  | -0.32164200 |
| H | -4.37301600 | 1.24444000  | -0.80381500 |
| H | -5.49405700 | 0.65905800  | -2.05809200 |

**TS2a**

|    |             |             |             |
|----|-------------|-------------|-------------|
| C  | 1.06653100  | -3.26169700 | 0.89707600  |
| C  | 0.54722400  | -3.91078600 | -0.27429700 |
| C  | -0.56692600 | -3.14245700 | -0.75168700 |
| C  | -0.73537700 | -2.00263700 | 0.12552500  |
| C  | 0.28241800  | -2.09040100 | 1.14667400  |
| H  | 1.94176700  | -3.57408900 | 1.46109400  |
| H  | 0.95986500  | -4.79560800 | -0.75485800 |
| H  | -1.15020900 | -3.36749000 | -1.63860700 |
| H  | 0.40238800  | -1.32329700 | 1.90892100  |
| Fe | 1.11585500  | -1.99828100 | -0.71292300 |
| C  | 1.31585200  | -0.28606800 | -1.78841500 |
| C  | 1.46936900  | -1.42949700 | -2.64062100 |
| C  | 2.31868500  | -0.33047700 | -0.74870000 |
| H  | 0.54282100  | 0.47111600  | -1.86089700 |
| C  | 2.56301900  | -2.20882700 | -2.13184400 |
| H  | 0.83585800  | -1.68852800 | -3.48532500 |
| C  | 3.08138200  | -1.53874400 | -0.97190400 |
| H  | 2.89862700  | -3.16970700 | -2.51726900 |
| H  | 3.87893700  | -1.91170100 | -0.33769200 |
| C  | 3.70901100  | 0.43217000  | 1.75905100  |
| C  | 5.17077400  | 0.21893900  | 1.31791600  |
| C  | 3.16948700  | -0.81383700 | 2.48793600  |



|   |             |             |             |
|---|-------------|-------------|-------------|
| H | 3.70550900  | 1.26497800  | 2.48609800  |
| H | 5.61103300  | 1.13387000  | 0.89586800  |
| H | 5.77734400  | -0.07636500 | 2.19264100  |
| H | 5.25973600  | -0.57775100 | 0.56499600  |
| H | 2.16673700  | -0.63515600 | 2.89575600  |
| H | 3.11075500  | -1.67064900 | 1.80278200  |
| H | 3.84475700  | -1.07897600 | 3.32022300  |
| C | 3.55427000  | 2.27103100  | -0.53776400 |
| C | 2.67236300  | 3.38421700  | -1.13824200 |
| C | 4.42889100  | 1.65009500  | -1.64396400 |
| H | 4.20738100  | 2.72522900  | 0.22924200  |
| H | 2.02496800  | 3.84973100  | -0.37827500 |
| H | 3.30226300  | 4.16781900  | -1.59526200 |
| H | 2.02647600  | 2.97408700  | -1.93089800 |
| H | 5.08759100  | 0.85803800  | -1.26449800 |
| H | 3.79197800  | 1.20804900  | -2.42616400 |
| H | 5.05441300  | 2.43059800  | -2.11334500 |
| C | -2.97689600 | -0.83067900 | -1.41293000 |
| C | -3.88685000 | -2.07002400 | -1.52838600 |
| C | -2.04746100 | -0.70313900 | -2.63669800 |
| H | -3.61495700 | 0.06738700  | -1.39903700 |
| H | -4.68511500 | -2.05677200 | -0.77373000 |
| H | -4.36109600 | -2.08171200 | -2.52520800 |
| H | -3.32088100 | -3.00516300 | -1.40877400 |
| H | -1.44881600 | 0.21266900  | -2.58451800 |
| H | -1.36466000 | -1.55796100 | -2.71523000 |
| H | -2.66201000 | -0.65174800 | -3.55110500 |
| C | -3.07268600 | -1.21636100 | 1.62330000  |
| C | -3.36945100 | -2.72076800 | 1.75803900  |
| C | -4.33937700 | -0.34142000 | 1.67418600  |

|    |             |             |             |
|----|-------------|-------------|-------------|
| H  | -2.41805900 | -0.91209400 | 2.45760700  |
| H  | -2.44421500 | -3.31283500 | 1.69646200  |
| H  | -3.83286300 | -2.90823200 | 2.74201100  |
| H  | -4.06356000 | -3.08204700 | 0.98599900  |
| H  | -4.06759500 | 0.72701000  | 1.68217600  |
| H  | -5.00388800 | -0.53025500 | 0.81460800  |
| H  | -4.90839500 | -0.56001100 | 2.59326800  |
| P  | 2.45497200  | 1.04798400  | 0.46096900  |
| P  | -1.99051000 | -0.68866900 | 0.17609200  |
| Pd | -1.26236500 | 1.47453300  | 0.95688900  |
| C  | -2.59943700 | 2.65661400  | -0.44696800 |
| H  | -3.60537100 | 2.28203100  | -0.23489900 |
| C  | -2.21379800 | 2.66769500  | -1.86657500 |
| C  | -3.11952700 | 2.36864000  | -2.82603400 |
| H  | -4.15019800 | 2.10642600  | -2.57402200 |
| H  | -2.85033700 | 2.37877200  | -3.88415700 |
| C  | -0.78975700 | 3.05256400  | -2.20073800 |
| H  | -0.09193100 | 2.50906300  | -1.54591900 |
| H  | -0.54993200 | 2.84043700  | -3.25335400 |
| H  | -0.61199200 | 4.12719300  | -2.02131700 |
| O  | -0.45079800 | 0.42861300  | 2.56911200  |
| H  | -0.72281400 | 2.78264500  | 1.67302300  |
| C  | 0.29074200  | 1.13649700  | 3.52836900  |
| H  | 1.21964300  | 1.58383400  | 3.11065000  |
| H  | -0.28799200 | 1.95753800  | 4.00779900  |
| H  | 0.59509700  | 0.42973700  | 4.33166900  |
| C  | -2.00734400 | 3.51090300  | 0.51912400  |
| H  | -1.22537400 | 4.20413000  | 0.20533400  |
| H  | -2.59846400 | 3.83466200  | 1.37784100  |

**TS3a**

|    |             |             |             |
|----|-------------|-------------|-------------|
| C  | 3.57716300  | 2.28699800  | -0.60440200 |
| C  | 3.59673900  | 1.87882100  | 0.77092700  |
| C  | 2.23950700  | 1.67010000  | 1.18793500  |
| C  | 1.35957300  | 1.97296000  | 0.08212000  |
| C  | 2.20686900  | 2.33414700  | -1.03139500 |
| H  | 4.44743000  | 2.45961000  | -1.23454900 |
| H  | 4.48480500  | 1.69245500  | 1.37118600  |
| H  | 1.92495100  | 1.30473400  | 2.15814400  |
| H  | 1.86346300  | 2.56069100  | -2.03607900 |
| Fe | 2.69413300  | 0.46554600  | -0.39383900 |
| C  | 3.21353500  | -1.42706100 | 0.19345100  |
| C  | 4.08786300  | -0.95481400 | -0.84281900 |
| C  | 1.86089900  | -1.41964200 | -0.30643500 |
| H  | 3.51686400  | -1.70004000 | 1.19951000  |
| C  | 3.28635800  | -0.64910700 | -1.99470800 |
| H  | 5.15995400  | -0.79175000 | -0.74851900 |
| C  | 1.91775300  | -0.91954000 | -1.66212200 |
| H  | 3.64563700  | -0.21472800 | -2.92522400 |
| H  | 1.04804300  | -0.73750100 | -2.28743600 |
| C  | 0.09792700  | -3.68146100 | -0.42953900 |
| C  | 1.42167000  | -4.40747800 | -0.74506100 |
| C  | -0.73495900 | -3.55205900 | -1.71967800 |
| H  | -0.47760200 | -4.27064600 | 0.30884000  |
| H  | 2.06808500  | -4.52884100 | 0.13338200  |
| H  | 1.20642400  | -5.40801000 | -1.16048700 |
| H  | 1.98636400  | -3.84020300 | -1.50101400 |
| H  | -1.66620800 | -2.99603300 | -1.55934900 |
| H  | -0.15660000 | -3.00959400 | -2.48484000 |
| H  | -0.96348000 | -4.55478000 | -2.12161600 |
| C  | 0.59416200  | -2.40025700 | 2.20374800  |

|   |             |             |             |
|---|-------------|-------------|-------------|
| C | 1.02154200  | -1.13634300 | 2.97201000  |
| C | 1.52082900  | -3.58885700 | 2.51947900  |
| H | -0.41934100 | -2.67073900 | 2.55457800  |
| H | 0.33861000  | -0.30310200 | 2.75266000  |
| H | 1.01447500  | -1.33218200 | 4.05815000  |
| H | 2.03769600  | -0.83216500 | 2.68180000  |
| H | 1.13765100  | -4.52610600 | 2.09090900  |
| H | 2.53702700  | -3.42567600 | 2.13078500  |
| H | 1.59341500  | -3.72068500 | 3.61366000  |
| C | -0.88752000 | 3.13921100  | 1.48998400  |
| C | -0.17825600 | 4.50752100  | 1.41168700  |
| C | -0.61385500 | 2.52528700  | 2.88112400  |
| H | -1.97754200 | 3.27821700  | 1.37907300  |
| H | -0.50384900 | 5.10976600  | 0.55671200  |
| H | -0.38782000 | 5.08315100  | 2.33073800  |
| H | 0.91224900  | 4.36744000  | 1.34324100  |
| H | -0.93471300 | 1.47903100  | 2.94716800  |
| H | 0.46180400  | 2.56974000  | 3.10967300  |
| H | -1.13898400 | 3.11090900  | 3.65469400  |
| C | -0.94259400 | 2.68722000  | -1.52143300 |
| C | -0.44756700 | 4.11768600  | -1.83047100 |
| C | -2.46973000 | 2.59933300  | -1.71621400 |
| H | -0.47172800 | 1.99202000  | -2.23683500 |
| H | 0.56418800  | 4.32080800  | -1.45498400 |
| H | -0.45051800 | 4.27211300  | -2.92359200 |
| H | -1.13237100 | 4.86335300  | -1.39833900 |
| H | -2.80282600 | 1.55422000  | -1.67432200 |
| H | -2.99386300 | 3.18314900  | -0.94037500 |
| H | -2.74172000 | 3.02876600  | -2.69635400 |
| P | 0.26739700  | -1.96603100 | 0.39382100  |

|    |             |             |             |
|----|-------------|-------------|-------------|
| P  | -0.47339100 | 1.88019000  | 0.12482300  |
| Pd | -1.45736400 | -0.23497300 | 0.20541800  |
| C  | -3.56045700 | -1.79467600 | 0.29170800  |
| H  | -2.96450400 | -2.61870300 | 0.69452100  |
| C  | -3.56530600 | -0.58456100 | 1.05098100  |
| C  | -2.61783700 | -0.43169500 | 2.09598000  |
| H  | -2.17572600 | -1.31219700 | 2.57183500  |
| H  | -2.68496300 | 0.45760500  | 2.72351200  |
| C  | -4.52241300 | 0.54172000  | 0.69845400  |
| H  | -4.24075400 | 1.46387100  | 1.22808400  |
| H  | -4.51179100 | 0.74913100  | -0.38069500 |
| H  | -5.55704600 | 0.27573300  | 0.98215400  |
| C  | -1.68165400 | -0.48804700 | -3.26423200 |
| H  | -2.43973300 | -0.86862400 | -3.97852800 |
| H  | -1.46987200 | 0.56539300  | -3.54162100 |
| H  | -0.75411700 | -1.07900300 | -3.42618000 |
| O  | -2.15665400 | -0.58245600 | -1.94843800 |
| C  | -4.14186700 | -1.94453900 | -1.00866000 |
| H  | -3.16659000 | -1.33379700 | -1.70716100 |
| H  | -4.23868700 | -2.97551000 | -1.37008200 |
| H  | -5.02201900 | -1.32466000 | -1.22290100 |

**Int3a**

|   |             |             |             |
|---|-------------|-------------|-------------|
| C | -4.19955900 | 1.54861800  | -2.42890700 |
| C | -4.97222800 | 1.40606900  | -1.22768200 |
| C | -4.45176500 | 0.28452200  | -0.49876700 |
| C | -3.36568100 | -0.29452000 | -1.25392000 |
| C | -3.20746000 | 0.51080300  | -2.44200300 |
| H | -4.29972600 | 2.34411600  | -3.16469700 |
| H | -5.76605600 | 2.07146900  | -0.89448900 |
| H | -4.79653200 | -0.05987500 | 0.46978100  |

|    |             |             |             |
|----|-------------|-------------|-------------|
| H  | -2.44159000 | 0.37261600  | -3.19960200 |
| Fe | -3.00056300 | 1.68703600  | -0.79152900 |
| C  | -2.76937800 | 2.88065100  | 0.85055300  |
| C  | -2.78614200 | 3.66288300  | -0.35335900 |
| C  | -1.67649600 | 1.94245100  | 0.77163700  |
| H  | -3.48735300 | 2.95532500  | 1.66154800  |
| C  | -1.70721300 | 3.21247600  | -1.18715500 |
| H  | -3.53109800 | 4.41151300  | -0.61794500 |
| C  | -1.03015500 | 2.15220300  | -0.50274400 |
| H  | -1.48167000 | 3.56564500  | -2.18933800 |
| H  | -0.18572100 | 1.57151600  | -0.86041900 |
| C  | 0.43763200  | 1.82471000  | 2.70637600  |
| C  | 0.19075700  | 3.34665900  | 2.65680200  |
| C  | 1.77849000  | 1.50485400  | 2.02452900  |
| H  | 0.48515500  | 1.49889200  | 3.76219500  |
| H  | -0.76972500 | 3.64125300  | 3.09980000  |
| H  | 1.00164200  | 3.86689800  | 3.19677200  |
| H  | 0.20261100  | 3.69151200  | 1.61216300  |
| H  | 2.03401600  | 0.44275000  | 2.10575100  |
| H  | 1.73096000  | 1.74937100  | 0.95535600  |
| H  | 2.58835400  | 2.10184000  | 2.47413000  |
| C  | -2.18024800 | 0.64957900  | 3.40596200  |
| C  | -3.53199100 | 0.10231500  | 2.91678400  |
| C  | -2.37374900 | 1.89765700  | 4.28773900  |
| H  | -1.71464900 | -0.13237700 | 4.03520000  |
| H  | -3.38512800 | -0.78854800 | 2.29199800  |
| H  | -4.16971600 | -0.16498000 | 3.77733400  |
| H  | -4.05882300 | 0.85862800  | 2.31736800  |
| H  | -1.42553800 | 2.24211500  | 4.72465600  |
| H  | -2.80737600 | 2.73174400  | 3.71635800  |

|    |             |             |             |
|----|-------------|-------------|-------------|
| H  | -3.06489100 | 1.66055100  | 5.11602900  |
| C  | -3.71107800 | -3.07252400 | -0.45127400 |
| C  | -4.94696300 | -3.03917400 | -1.37567200 |
| C  | -4.19441700 | -3.01933600 | 1.01295800  |
| H  | -3.16433800 | -4.02120200 | -0.60108200 |
| H  | -4.70303100 | -3.19101800 | -2.43235100 |
| H  | -5.65190600 | -3.83219800 | -1.06925800 |
| H  | -5.46438100 | -2.07234800 | -1.28186100 |
| H  | -3.36169900 | -2.93145100 | 1.72039400  |
| H  | -4.86044200 | -2.15562500 | 1.16446000  |
| H  | -4.77510700 | -3.92807700 | 1.24701100  |
| C  | -1.59423300 | -2.23416000 | -2.42667100 |
| C  | -2.52374000 | -2.55222500 | -3.61346600 |
| C  | -0.59143600 | -3.37892300 | -2.20388300 |
| H  | -1.01641300 | -1.33078500 | -2.67440500 |
| H  | -3.34610700 | -1.82961800 | -3.71179500 |
| H  | -1.93687800 | -2.53967200 | -4.54871900 |
| H  | -2.95257100 | -3.56131000 | -3.51202200 |
| H  | 0.13580700  | -3.10598900 | -1.42974300 |
| H  | -1.10881600 | -4.29940300 | -1.88391800 |
| H  | -0.05789100 | -3.60264700 | -3.14390800 |
| P  | -0.96416000 | 0.75314100  | 1.95984100  |
| P  | -2.37270200 | -1.75400200 | -0.76786200 |
| Pd | -0.65106800 | -1.44435200 | 0.77407400  |
| C  | 1.49121700  | -2.19317100 | 2.02862100  |
| H  | 1.27638500  | -1.50623200 | 2.85210300  |
| C  | 0.49457900  | -3.18196400 | 1.76291700  |
| C  | -0.79794600 | -3.01286400 | 2.32479000  |
| H  | -0.93276500 | -2.42480100 | 3.23870200  |
| H  | -1.53277400 | -3.80380300 | 2.16334900  |

|   |             |             |             |
|---|-------------|-------------|-------------|
| C | 0.79708400  | -4.37049800 | 0.86935900  |
| H | -0.13339300 | -4.82395600 | 0.49836100  |
| H | 1.41141900  | -4.08803000 | 0.00347800  |
| H | 1.35732800  | -5.13691800 | 1.43558000  |
| C | 1.37392500  | -0.51053700 | -1.80463700 |
| H | 2.30735300  | 0.02986800  | -2.05153000 |
| H | 1.42972600  | -1.52159300 | -2.25819300 |
| H | 0.55459800  | 0.04450600  | -2.29871000 |
| O | 1.15026300  | -0.53635600 | -0.41451600 |
| C | 2.64263900  | -1.93843300 | 1.22172700  |
| H | 1.85280805  | -1.04285959 | 0.13254883  |
| H | 3.41810800  | -1.32002800 | 1.68429000  |
| H | 3.05121200  | -2.77491300 | 0.64333600  |
| C | 5.76164200  | -1.14494600 | 0.31293700  |
| C | 4.92093500  | -0.72757800 | -0.74059300 |
| C | 4.68268100  | -1.58829400 | -1.80980900 |
| C | 5.27998400  | -2.86615400 | -1.81239000 |
| C | 6.10581800  | -3.26670200 | -0.74891600 |
| C | 6.36249300  | -2.40559700 | 0.33568200  |
| C | 5.13365900  | 1.02280400  | 0.87795800  |
| H | 4.03240300  | -1.28109900 | -2.62969500 |
| H | 5.09831000  | -3.54771000 | -2.64530600 |
| H | 6.56035600  | -4.25934700 | -0.75944800 |
| H | 7.00240700  | -2.71613900 | 1.16368300  |
| N | 5.83890300  | -0.11522800 | 1.26263700  |
| H | 6.44465900  | -0.11454800 | 2.07626700  |
| O | 5.14880300  | 2.08697400  | 1.48639700  |
| C | 4.37993300  | 0.65111300  | -0.42428600 |
| H | 3.31443400  | 0.56022800  | -0.15084000 |
| C | 4.52036900  | 1.70924700  | -1.56346400 |



|   |            |            |             |
|---|------------|------------|-------------|
| H | 4.58243000 | 1.16720200 | -2.52000200 |
| H | 5.47944200 | 2.23899300 | -1.43732900 |
| C | 3.38019300 | 2.71137400 | -1.63791300 |
| C | 3.10006700 | 3.57795100 | -0.56245300 |
| C | 2.58215600 | 2.79000800 | -2.79501300 |
| C | 2.04883300 | 4.50222100 | -0.64912300 |
| H | 3.70620300 | 3.51093200 | 0.34079800  |
| C | 1.53219000 | 3.71801100 | -2.88592600 |
| H | 2.79028400 | 2.11949100 | -3.63312400 |
| C | 1.26444500 | 4.57988900 | -1.81143100 |
| H | 1.84032500 | 5.16244200 | 0.19526200  |
| H | 0.92729700 | 3.76666000 | -3.79477200 |
| H | 0.44646300 | 5.29977900 | -1.87348500 |

**TS4a**

|    |             |             |             |
|----|-------------|-------------|-------------|
| C  | -4.19955900 | 1.54861800  | -2.42890700 |
| C  | -4.97222800 | 1.40606900  | -1.22768200 |
| C  | -4.45176500 | 0.28452200  | -0.49876700 |
| C  | -3.36568100 | -0.29452000 | -1.25392000 |
| C  | -3.20746000 | 0.51080300  | -2.44200300 |
| H  | -4.29972600 | 2.34411600  | -3.16469700 |
| H  | -5.76605600 | 2.07146900  | -0.89448900 |
| H  | -4.79653200 | -0.05987500 | 0.46978100  |
| H  | -2.44159000 | 0.37261600  | -3.19960200 |
| Fe | -3.00056300 | 1.68703600  | -0.79152900 |
| C  | -2.76937800 | 2.88065100  | 0.85055300  |
| C  | -2.78614200 | 3.66288300  | -0.35335900 |
| C  | -1.67649600 | 1.94245100  | 0.77163700  |
| H  | -3.48735300 | 2.95532500  | 1.66154800  |
| C  | -1.70721300 | 3.21247600  | -1.18715500 |
| H  | -3.53109800 | 4.41151300  | -0.61794500 |

|   |             |             |             |
|---|-------------|-------------|-------------|
| C | -1.03015500 | 2.15220300  | -0.50274400 |
| H | -1.48167000 | 3.56564500  | -2.18933800 |
| H | -0.18572100 | 1.57151600  | -0.86041900 |
| C | 0.43763200  | 1.82471000  | 2.70637600  |
| C | 0.19075700  | 3.34665900  | 2.65680200  |
| C | 1.77849000  | 1.50485400  | 2.02452900  |
| H | 0.48515500  | 1.49889200  | 3.76219500  |
| H | -0.76972500 | 3.64125300  | 3.09980000  |
| H | 1.00164200  | 3.86689800  | 3.19677200  |
| H | 0.20261100  | 3.69151200  | 1.61216300  |
| H | 2.03401600  | 0.44275000  | 2.10575100  |
| H | 1.73096000  | 1.74937100  | 0.95535600  |
| H | 2.58835400  | 2.10184000  | 2.47413000  |
| C | -2.18024800 | 0.64957900  | 3.40596200  |
| C | -3.53199100 | 0.10231500  | 2.91678400  |
| C | -2.37374900 | 1.89765700  | 4.28773900  |
| H | -1.71464900 | -0.13237700 | 4.03520000  |
| H | -3.38512800 | -0.78854800 | 2.29199800  |
| H | -4.16971600 | -0.16498000 | 3.77733400  |
| H | -4.05882300 | 0.85862800  | 2.31736800  |
| H | -1.42553800 | 2.24211500  | 4.72465600  |
| H | -2.80737600 | 2.73174400  | 3.71635800  |
| H | -3.06489100 | 1.66055100  | 5.11602900  |
| C | -3.71107800 | -3.07252400 | -0.45127400 |
| C | -4.94696300 | -3.03917400 | -1.37567200 |
| C | -4.19441700 | -3.01933600 | 1.01295800  |
| H | -3.16433800 | -4.02120200 | -0.60108200 |
| H | -4.70303100 | -3.19101800 | -2.43235100 |
| H | -5.65190600 | -3.83219800 | -1.06925800 |
| H | -5.46438100 | -2.07234800 | -1.28186100 |

|    |             |             |             |
|----|-------------|-------------|-------------|
| H  | -3.36169900 | -2.93145100 | 1.72039400  |
| H  | -4.86044200 | -2.15562500 | 1.16446000  |
| H  | -4.77510700 | -3.92807700 | 1.24701100  |
| C  | -1.59423300 | -2.23416000 | -2.42667100 |
| C  | -2.52374000 | -2.55222500 | -3.61346600 |
| C  | -0.59143600 | -3.37892300 | -2.20388300 |
| H  | -1.01641300 | -1.33078500 | -2.67440500 |
| H  | -3.34610700 | -1.82961800 | -3.71179500 |
| H  | -1.93687800 | -2.53967200 | -4.54871900 |
| H  | -2.95257100 | -3.56131000 | -3.51202200 |
| H  | 0.13580700  | -3.10598900 | -1.42974300 |
| H  | -1.10881600 | -4.29940300 | -1.88391800 |
| H  | -0.05789100 | -3.60264700 | -3.14390800 |
| P  | -0.96416000 | 0.75314100  | 1.95984100  |
| P  | -2.37270200 | -1.75400200 | -0.76786200 |
| Pd | -0.65106800 | -1.44435200 | 0.77407400  |
| C  | 1.49121700  | -2.19317100 | 2.02862100  |
| H  | 1.27638500  | -1.50623200 | 2.85210300  |
| C  | 0.49457900  | -3.18196400 | 1.76291700  |
| C  | -0.79794600 | -3.01286400 | 2.32479000  |
| H  | -0.93276500 | -2.42480100 | 3.23870200  |
| H  | -1.53277400 | -3.80380300 | 2.16334900  |
| C  | 0.79708400  | -4.37049800 | 0.86935900  |
| H  | -0.13339300 | -4.82395600 | 0.49836100  |
| H  | 1.41141900  | -4.08803000 | 0.00347800  |
| H  | 1.35732800  | -5.13691800 | 1.43558000  |
| C  | 1.37392500  | -0.51053700 | -1.80463700 |
| H  | 2.30735300  | 0.02986800  | -2.05153000 |
| H  | 1.42972600  | -1.52159300 | -2.25819300 |
| H  | 0.55459800  | 0.04450600  | -2.29871000 |

|   |            |             |             |
|---|------------|-------------|-------------|
| O | 1.15026300 | -0.53635600 | -0.41451600 |
| C | 2.64263900 | -1.93843300 | 1.22172700  |
| H | 2.02720500 | -1.16859200 | 0.26835000  |
| H | 3.41810800 | -1.32002800 | 1.68429000  |
| H | 3.05121200 | -2.77491300 | 0.64333600  |
| C | 5.76164200 | -1.14494600 | 0.31293700  |
| C | 4.92093500 | -0.72757800 | -0.74059300 |
| C | 4.68268100 | -1.58829400 | -1.80980900 |
| C | 5.27998400 | -2.86615400 | -1.81239000 |
| C | 6.10581800 | -3.26670200 | -0.74891600 |
| C | 6.36249300 | -2.40559700 | 0.33568200  |
| C | 5.13365900 | 1.02280400  | 0.87795800  |
| H | 4.03240300 | -1.28109900 | -2.62969500 |
| H | 5.09831000 | -3.54771000 | -2.64530600 |
| H | 6.56035600 | -4.25934700 | -0.75944800 |
| H | 7.00240700 | -2.71613900 | 1.16368300  |
| N | 5.83890300 | -0.11522800 | 1.26263700  |
| H | 6.44465900 | -0.11454800 | 2.07626700  |
| O | 5.14880300 | 2.08697400  | 1.48639700  |
| C | 4.37993300 | 0.65111300  | -0.42428600 |
| H | 3.31443400 | 0.56022800  | -0.15084000 |
| C | 4.52036900 | 1.70924700  | -1.56346400 |
| H | 4.58243000 | 1.16720200  | -2.52000200 |
| H | 5.47944200 | 2.23899300  | -1.43732900 |
| C | 3.38019300 | 2.71137400  | -1.63791300 |
| C | 3.10006700 | 3.57795100  | -0.56245300 |
| C | 2.58215600 | 2.79000800  | -2.79501300 |
| C | 2.04883300 | 4.50222100  | -0.64912300 |
| H | 3.70620300 | 3.51093200  | 0.34079800  |
| C | 1.53219000 | 3.71801100  | -2.88592600 |

|   |            |            |             |
|---|------------|------------|-------------|
| H | 2.79028400 | 2.11949100 | -3.63312400 |
| C | 1.26444500 | 4.57988900 | -1.81143100 |
| H | 1.84032500 | 5.16244200 | 0.19526200  |
| H | 0.92729700 | 3.76666000 | -3.79477200 |
| H | 0.44646300 | 5.29977900 | -1.87348500 |

**Int4a**

|    |             |             |             |
|----|-------------|-------------|-------------|
| C  | -3.22617300 | -2.83194400 | -2.30711700 |
| C  | -4.26706500 | -2.74822500 | -1.32203700 |
| C  | -3.67901100 | -2.27266700 | -0.10077400 |
| C  | -2.25634100 | -2.10723000 | -0.30336800 |
| C  | -1.99796200 | -2.42142800 | -1.68822100 |
| H  | -3.35465600 | -3.09806300 | -3.35419700 |
| H  | -5.32543200 | -2.93697600 | -1.48968700 |
| H  | -4.21407900 | -2.06917000 | 0.82139300  |
| H  | -1.02827200 | -2.35824900 | -2.17238400 |
| Fe | -3.40417400 | -0.93295000 | -1.59926500 |
| C  | -4.61266000 | 0.66921000  | -1.21874900 |
| C  | -4.89676700 | 0.11106000  | -2.50958700 |
| C  | -3.23050200 | 1.08884500  | -1.18781100 |
| H  | -5.31916500 | 0.73549300  | -0.39899100 |
| C  | -3.69550500 | 0.17192300  | -3.29173600 |
| H  | -5.84091500 | -0.33475200 | -2.81666100 |
| C  | -2.67039300 | 0.75744400  | -2.47975700 |
| H  | -3.56650500 | -0.21830400 | -4.29894700 |
| H  | -1.63602800 | 0.90601700  | -2.76722600 |
| C  | -1.82793900 | 3.56182300  | -0.50356900 |
| C  | -2.82877900 | 4.14268400  | -1.52200700 |
| C  | -0.40028400 | 3.60683600  | -1.08763100 |
| H  | -1.84831800 | 4.17593400  | 0.41598100  |
| H  | -3.86133800 | 4.15887500  | -1.14964300 |

|   |             |             |             |
|---|-------------|-------------|-------------|
| H | -2.53515800 | 5.17404200  | -1.78624200 |
| H | -2.81506400 | 3.54013900  | -2.44341300 |
| H | 0.31269100  | 2.99896600  | -0.51630600 |
| H | -0.40677000 | 3.22465600  | -2.12118300 |
| H | -0.04186500 | 4.64921800  | -1.12477800 |
| C | -3.47406100 | 2.21345000  | 1.52665800  |
| C | -3.95562600 | 0.90752700  | 2.18415700  |
| C | -4.63660200 | 3.17019000  | 1.20283300  |
| H | -2.82687800 | 2.72238700  | 2.26495200  |
| H | -3.09254700 | 0.28366800  | 2.44276400  |
| H | -4.52594200 | 1.13170100  | 3.10218200  |
| H | -4.60389700 | 0.32583600  | 1.51349000  |
| H | -4.26870200 | 4.17312000  | 0.94298600  |
| H | -5.24888800 | 2.80397000  | 0.36584500  |
| H | -5.29115800 | 3.27008400  | 2.08679200  |
| C | -1.54841700 | -2.83418900 | 2.42750900  |
| C | -2.06319500 | -4.23747600 | 2.03779600  |
| C | -2.58594100 | -2.17263600 | 3.35543000  |
| H | -0.61142900 | -2.94672200 | 2.99914400  |
| H | -1.36651400 | -4.79297200 | 1.40253900  |
| H | -2.23355400 | -4.82272900 | 2.95841000  |
| H | -3.02119200 | -4.16394200 | 1.50332500  |
| H | -2.26110800 | -1.19120100 | 3.71444300  |
| H | -3.55234900 | -2.04440200 | 2.84580700  |
| H | -2.75726300 | -2.82549000 | 4.22850800  |
| C | 0.57255800  | -2.55515500 | 0.33727500  |
| C | 0.51556700  | -4.02246800 | -0.12891300 |
| C | 1.68621400  | -2.35815800 | 1.38265100  |
| H | 0.83577900  | -1.91736700 | -0.51591800 |
| H | -0.39284200 | -4.25421300 | -0.70402900 |

|    |             |             |             |
|----|-------------|-------------|-------------|
| H  | 1.39406100  | -4.21627200 | -0.76589200 |
| H  | 0.57463700  | -4.71229600 | 0.72757300  |
| H  | 1.87028100  | -1.28983700 | 1.54758200  |
| H  | 1.43107900  | -2.83175400 | 2.34600900  |
| H  | 2.60688900  | -2.83198000 | 1.01530300  |
| P  | -2.23369400 | 1.82019700  | 0.15672100  |
| P  | -1.00071600 | -1.72413900 | 0.97705700  |
| Pd | -0.31971100 | 0.52229800  | 1.28750800  |
| C  | 0.84097900  | 2.36376100  | 2.14632100  |
| H  | 0.00190900  | 3.06541500  | 2.10166000  |
| C  | 0.73842300  | 1.29241200  | 3.06866900  |
| C  | -0.59985800 | 0.89211100  | 3.40829400  |
| H  | -1.39050000 | 1.64533300  | 3.48821600  |
| H  | -0.70858300 | 0.03593800  | 4.07639700  |
| C  | 1.94346800  | 0.52172000  | 3.56937500  |
| H  | 1.64957400  | -0.49419300 | 3.87267300  |
| H  | 2.73559300  | 0.45263400  | 2.81307000  |
| H  | 2.37034200  | 1.03290900  | 4.45193200  |
| C  | 0.69371000  | 0.31306100  | -1.71772600 |
| H  | 1.57047300  | -0.04073100 | -2.31349900 |
| H  | -0.11249700 | -0.43880100 | -1.86030100 |
| H  | 0.34622700  | 1.24808900  | -2.21760800 |
| O  | 1.05281800  | 0.49842100  | -0.39519200 |
| C  | 2.11125300  | 2.75957000  | 1.44838100  |
| H  | 2.18906900  | 2.20285300  | 0.49726000  |
| H  | 2.12049500  | 3.83201300  | 1.20938200  |
| H  | 3.00707400  | 2.51293200  | 2.03490100  |
| C  | 4.79203500  | -2.54756000 | -0.23055100 |
| C  | 3.97054600  | -1.80584800 | -1.10987600 |
| C  | 3.37773300  | -2.44466400 | -2.19707900 |

|   |            |             |             |
|---|------------|-------------|-------------|
| C | 3.60609600 | -3.82326700 | -2.39769600 |
| C | 4.42301600 | -4.54391500 | -1.51046600 |
| C | 5.03112000 | -3.91362500 | -0.40646400 |
| C | 4.71413600 | -0.40139000 | 0.66768100  |
| H | 2.73484300 | -1.88277300 | -2.87796700 |
| H | 3.14327000 | -4.33287800 | -3.24484000 |
| H | 4.59084900 | -5.61053900 | -1.67293600 |
| H | 5.66110500 | -4.47535500 | 0.28607800  |
| N | 5.23564000 | -1.69417500 | 0.78698200  |
| H | 5.78240100 | -1.97669100 | 1.59313700  |
| O | 4.90790700 | 0.49451600  | 1.48433100  |
| C | 3.90146000 | -0.37368600 | -0.63857600 |
| H | 2.85644000 | -0.05785600 | -0.40939300 |
| C | 4.50339800 | 0.60875600  | -1.70052000 |
| H | 4.05416400 | 0.33263600  | -2.66723800 |
| H | 5.58590700 | 0.41330000  | -1.78222700 |
| C | 4.25248500 | 2.08115200  | -1.44459800 |
| C | 5.09249400 | 2.83242300  | -0.60100000 |
| C | 3.17243500 | 2.72901300  | -2.07313200 |
| C | 4.85745800 | 4.19942900  | -0.39222100 |
| H | 5.92102200 | 2.33741700  | -0.09442900 |
| C | 2.93841900 | 4.09706300  | -1.87378000 |
| H | 2.50961200 | 2.15140600  | -2.71938600 |
| C | 3.78185600 | 4.83801900  | -1.03126200 |
| H | 5.51692900 | 4.76703000  | 0.26834100  |
| H | 2.09646300 | 4.58025500  | -2.37274000 |
| H | 3.60364400 | 5.90441200  | -0.87402300 |

**TS5a**

|   |             |             |             |
|---|-------------|-------------|-------------|
| C | -2.72091900 | -2.89420700 | -2.48269100 |
|---|-------------|-------------|-------------|



|    |             |             |             |
|----|-------------|-------------|-------------|
| C  | -3.86772300 | -3.00764500 | -1.62496500 |
| C  | -3.48500900 | -2.56217300 | -0.31407900 |
| C  | -2.08789500 | -2.19495700 | -0.34726500 |
| C  | -1.63013200 | -2.38225300 | -1.70371700 |
| H  | -2.70036200 | -3.09548100 | -3.55135400 |
| H  | -4.86729400 | -3.31089400 | -1.92868200 |
| H  | -4.13891700 | -2.49368300 | 0.54977000  |
| H  | -0.63119700 | -2.14565500 | -2.05933400 |
| Fe | -3.20242500 | -1.08958500 | -1.67559300 |
| C  | -4.42470000 | 0.45436100  | -1.17219400 |
| C  | -4.78343500 | -0.07182500 | -2.45867200 |
| C  | -3.04923400 | 0.89634900  | -1.22593600 |
| H  | -5.07284900 | 0.48772100  | -0.30306000 |
| C  | -3.63822300 | 0.03382700  | -3.31719800 |
| H  | -5.73644600 | -0.52931300 | -2.71523700 |
| C  | -2.56916800 | 0.61850000  | -2.56123500 |
| H  | -3.56882800 | -0.33073900 | -4.33947800 |
| H  | -1.56022000 | 0.80092900  | -2.91723400 |
| C  | -1.38230800 | 3.26274100  | -0.82278800 |
| C  | -2.23393100 | 3.78959900  | -1.99883000 |
| C  | 0.07768200  | 3.08707100  | -1.27451800 |
| H  | -1.41280900 | 4.01038900  | -0.01303600 |
| H  | -3.30773600 | 3.84417900  | -1.77975600 |
| H  | -1.87754300 | 4.79894400  | -2.26576200 |
| H  | -2.10675100 | 3.14726100  | -2.88137300 |
| H  | 0.68832000  | 2.51138100  | -0.56675700 |
| H  | 0.11712600  | 2.55393500  | -2.23501800 |
| H  | 0.54026700  | 4.07261200  | -1.42482800 |
| C  | -3.31807200 | 2.51578000  | 1.24427900  |
| C  | -3.90080500 | 1.47458100  | 2.21641200  |

|   |             |             |             |
|---|-------------|-------------|-------------|
| C | -4.41409600 | 3.38839200  | 0.60235400  |
| H | -2.66340500 | 3.17694800  | 1.83840400  |
| H | -3.08893700 | 0.97012900  | 2.75502500  |
| H | -4.56266200 | 1.97395200  | 2.94442200  |
| H | -4.48769400 | 0.70135600  | 1.69921900  |
| H | -3.98968800 | 4.28991700  | 0.14011300  |
| H | -4.98055100 | 2.83963200  | -0.16401700 |
| H | -5.12231300 | 3.71406900  | 1.38340200  |
| C | -1.70181300 | -2.63118500 | 2.54165200  |
| C | -2.16803000 | -4.08406000 | 2.31277700  |
| C | -2.81194400 | -1.81242000 | 3.22593200  |
| H | -0.83548200 | -2.65002200 | 3.22359100  |
| H | -1.39441200 | -4.70845800 | 1.85352900  |
| H | -2.43524000 | -4.52656900 | 3.28782400  |
| H | -3.05892200 | -4.12411900 | 1.67130200  |
| H | -2.43842500 | -0.82658800 | 3.52759100  |
| H | -3.67296800 | -1.65793600 | 2.55737000  |
| H | -3.17001000 | -2.34699600 | 4.12227800  |
| C | 0.61338400  | -2.59509700 | 0.62104900  |
| C | 0.52394400  | -4.07634000 | 0.19722100  |
| C | 1.63628900  | -2.40726600 | 1.75239800  |
| H | 0.98657000  | -1.99909000 | -0.21819400 |
| H | -0.35038300 | -4.29391700 | -0.43319900 |
| H | 1.43507100  | -4.31691200 | -0.37283100 |
| H | 0.49927700  | -4.74034100 | 1.07562800  |
| H | 1.91114800  | -1.35069800 | 1.83497000  |
| H | 1.26119200  | -2.77987600 | 2.72124900  |
| H | 2.53817100  | -2.97927000 | 1.49991500  |
| P | -2.06033300 | 1.73056000  | 0.06605700  |
| P | -1.00025900 | -1.71654400 | 1.04277500  |

|    |             |             |             |
|----|-------------|-------------|-------------|
| Pd | -0.59775800 | 0.54665300  | 1.48718100  |
| C  | 0.01186600  | 2.42143000  | 2.67168000  |
| H  | -0.91510100 | 2.49521500  | 3.25372200  |
| C  | 0.88962300  | 1.34493600  | 2.98901800  |
| C  | 0.29379600  | 0.16815400  | 3.51089500  |
| H  | -0.61960900 | 0.23461800  | 4.10968400  |
| H  | 0.90981800  | -0.71385100 | 3.67232600  |
| C  | 2.33818300  | 1.37794500  | 2.56111600  |
| H  | 2.85738400  | 0.44402200  | 2.80397400  |
| H  | 2.41553500  | 1.53880800  | 1.47804400  |
| H  | 2.85827900  | 2.20670100  | 3.06965400  |
| C  | 1.10674700  | 0.10306400  | -1.59480600 |
| H  | 1.24564200  | -0.93248200 | -1.99404600 |
| H  | 0.02334000  | 0.32332600  | -1.66151300 |
| H  | 1.62500500  | 0.78187000  | -2.31169100 |
| O  | 1.55247500  | 0.25158400  | -0.28363800 |
| C  | 0.52939700  | 3.71234000  | 2.08521500  |
| H  | -0.29198700 | 4.34575900  | 1.72185000  |
| H  | 1.06575300  | 4.28852000  | 2.86407600  |
| H  | 1.23446600  | 3.53924400  | 1.26236100  |
| C  | 4.49509800  | -2.61253300 | -0.07666400 |
| C  | 4.04232100  | -1.73371700 | -1.10031600 |
| C  | 3.57465200  | -2.28733300 | -2.29843500 |
| C  | 3.55201600  | -3.68823100 | -2.46083200 |
| C  | 3.99166900  | -4.53722800 | -1.42909000 |
| C  | 4.47117300  | -4.00377500 | -0.21470400 |
| C  | 4.81806000  | -0.45060400 | 0.71141400  |
| H  | 3.23156400  | -1.63409200 | -3.10370400 |
| H  | 3.19259700  | -4.11780800 | -3.39882200 |
| H  | 3.96892700  | -5.62055400 | -1.56679500 |

|   |            |             |             |
|---|------------|-------------|-------------|
| H | 4.82320600 | -4.65747500 | 0.58712400  |
| N | 4.90267200 | -1.83074900 | 1.00066300  |
| H | 5.37483500 | -2.16916700 | 1.83120300  |
| O | 5.24917500 | 0.41526100  | 1.48631600  |
| C | 4.10865800 | -0.33653500 | -0.59941600 |
| H | 2.85847800 | -0.03959800 | -0.33669700 |
| C | 4.59114800 | 0.75069000  | -1.58688300 |
| H | 4.36112500 | 0.40086200  | -2.60627900 |
| H | 5.69344400 | 0.82146900  | -1.52866300 |
| C | 4.02641000 | 2.15554400  | -1.42976800 |
| C | 4.08925700 | 2.84019200  | -0.19886400 |
| C | 3.51463700 | 2.83852500  | -2.54982100 |
| C | 3.65292700 | 4.16998800  | -0.09832300 |
| H | 4.50374000 | 2.31778300  | 0.66401200  |
| C | 3.09011400 | 4.17418800  | -2.45639800 |
| H | 3.46539500 | 2.31962500  | -3.51137300 |
| C | 3.15799400 | 4.84693800  | -1.22680700 |
| H | 3.71685900 | 4.68683000  | 0.86303200  |
| H | 2.70386800 | 4.68538000  | -3.34190900 |
| H | 2.83158900 | 5.88711700  | -1.14866200 |

**Int5a**

|   |             |             |            |
|---|-------------|-------------|------------|
| C | 2.51447900  | -1.97100800 | 1.82462200 |
| C | 1.83067400  | -2.59968300 | 2.91794800 |
| C | 0.57535300  | -1.93061600 | 3.10053900 |
| C | 0.47426800  | -0.88502100 | 2.10376400 |
| C | 1.68873500  | -0.91852000 | 1.31488400 |
| H | 3.45972600  | -2.28369700 | 1.38921400 |
| H | 2.16720100  | -3.47634200 | 3.46761300 |
| H | -0.18381300 | -2.20515100 | 3.82513600 |
| H | 1.89717900  | -0.33626300 | 0.41988500 |

|    |             |             |             |
|----|-------------|-------------|-------------|
| Fe | 0.69074200  | -2.67726600 | 1.21807000  |
| C  | -1.02474700 | -3.60985100 | 0.68723600  |
| C  | -0.01751600 | -4.58019900 | 1.01200900  |
| C  | -0.53048600 | -2.79415000 | -0.40269900 |
| H  | -1.98111700 | -3.49018700 | 1.18664400  |
| C  | 1.10247600  | -4.36167200 | 0.14107500  |
| H  | -0.07021600 | -5.30746100 | 1.81949900  |
| C  | 0.79838900  | -3.25982300 | -0.72498300 |
| H  | 2.05568600  | -4.88385800 | 0.18161100  |
| H  | 1.46610600  | -2.81095100 | -1.45969600 |
| C  | -0.52401800 | -1.26767800 | -2.88740400 |
| C  | -1.25750100 | -0.26798300 | -3.80078100 |
| C  | -0.20484400 | -2.54351200 | -3.70152800 |
| H  | 0.41782500  | -0.80731200 | -2.54455300 |
| H  | -1.56952700 | 0.63436300  | -3.26151400 |
| H  | -0.59078300 | 0.02041100  | -4.63121000 |
| H  | -2.15304800 | -0.72933900 | -4.24808300 |
| H  | 0.04039000  | -3.41053800 | -3.07794700 |
| H  | -1.05304800 | -2.81176900 | -4.35261500 |
| H  | 0.67191400  | -2.34071300 | -4.33453000 |
| C  | -3.08066200 | -2.31633300 | -1.73123500 |
| C  | -4.12456400 | -2.17481400 | -0.60881800 |
| C  | -2.95800900 | -3.79356200 | -2.15475600 |
| H  | -3.42346600 | -1.72241500 | -2.59390100 |
| H  | -4.18238000 | -1.14032400 | -0.24395500 |
| H  | -5.11806100 | -2.48432000 | -0.97642900 |
| H  | -3.86945300 | -2.82206800 | 0.24423900  |
| H  | -2.28249900 | -3.93057100 | -3.00674900 |
| H  | -2.58283300 | -4.40471600 | -1.32060300 |
| H  | -3.95500800 | -4.17382600 | -2.43732900 |

|    |             |             |             |
|----|-------------|-------------|-------------|
| C  | -2.14212500 | 0.07611900  | 3.15607200  |
| C  | -1.75985400 | 0.14218200  | 4.64836500  |
| C  | -2.85421600 | -1.24351700 | 2.80122600  |
| H  | -2.85043800 | 0.89720500  | 2.95456800  |
| H  | -1.44986200 | 1.15438800  | 4.93962200  |
| H  | -2.63863100 | -0.13274800 | 5.25686600  |
| H  | -0.94290700 | -0.54709600 | 4.89970900  |
| H  | -3.18084900 | -1.23442900 | 1.75248400  |
| H  | -2.18724300 | -2.10548700 | 2.94192700  |
| H  | -3.73783200 | -1.37653000 | 3.44838300  |
| C  | 0.16765100  | 1.93383600  | 2.55544300  |
| C  | 1.16459700  | 1.60755800  | 3.69079400  |
| C  | -0.73705500 | 3.12735600  | 2.93285000  |
| H  | 0.74342300  | 2.23363600  | 1.67267400  |
| H  | 1.84675600  | 0.79092500  | 3.42195600  |
| H  | 1.77042700  | 2.50973500  | 3.87729300  |
| H  | 0.65751600  | 1.34039000  | 4.62869900  |
| H  | -1.08661000 | 3.65628600  | 2.04041500  |
| H  | -1.60086500 | 2.83544000  | 3.55139700  |
| H  | -0.14065700 | 3.84640300  | 3.51770500  |
| P  | -1.44984700 | -1.47594100 | -1.26410000 |
| P  | -0.77404200 | 0.42025700  | 1.90834300  |
| Pd | -1.90583500 | 0.57764900  | -0.15071200 |
| C  | -3.42670700 | 1.54314500  | -1.66322600 |
| H  | -2.64693700 | 2.15215700  | -2.13206100 |
| C  | -3.74973400 | 1.87752400  | -0.32688400 |
| C  | -2.74398400 | 2.52586600  | 0.44372600  |
| H  | -2.95223000 | 2.70164900  | 1.49858400  |
| H  | -2.02255600 | 3.19932900  | -0.03034700 |
| C  | -5.03469500 | 1.43727500  | 0.34651700  |

|   |             |             |             |
|---|-------------|-------------|-------------|
| H | -5.48033400 | 0.55105100  | -0.12317600 |
| H | -4.86016700 | 1.22428500  | 1.41181600  |
| H | -5.77315700 | 2.25524300  | 0.28159400  |
| C | 4.02719000  | -2.24753600 | -1.92530900 |
| H | 3.66608300  | -2.58096700 | -0.92888600 |
| H | 4.60541200  | -3.07267500 | -2.37382500 |
| H | 4.69296900  | -1.38222300 | -1.77288500 |
| O | 2.94927000  | -1.94148900 | -2.80657700 |
| C | 0.17747100  | 3.27146400  | -1.56871100 |
| C | 1.09368000  | 3.51352400  | -0.48504700 |
| C | 0.96308400  | 4.72286000  | 0.23369800  |
| C | -0.01776500 | 5.65650700  | -0.14686000 |
| C | -0.87554800 | 5.41465800  | -1.23993100 |
| C | -0.77766200 | 4.20729500  | -1.96820000 |
| C | 1.54224400  | 1.42111100  | -1.33210200 |
| H | 1.62547700  | 4.93367400  | 1.07749300  |
| H | -0.10971700 | 6.59320200  | 0.40888300  |
| H | -1.61448100 | 6.16324700  | -1.53286300 |
| H | -1.43430400 | 4.01343300  | -2.82172900 |
| N | 0.42440500  | 1.98381500  | -2.02735900 |
| H | 0.18994800  | 1.65990600  | -2.95662000 |
| O | 1.96200900  | 0.24782500  | -1.58954000 |
| C | 1.95079400  | 2.37114900  | -0.36674400 |
| H | 2.61307700  | -1.06236400 | -2.50515300 |
| C | 3.09840600  | 2.20493700  | 0.59803200  |
| H | 2.80224000  | 1.67023900  | 1.52001200  |
| H | 3.40181600  | 3.21506600  | 0.93498600  |
| C | 4.33114700  | 1.49697100  | 0.04597200  |
| C | 5.03345800  | 0.57569200  | 0.84444500  |
| C | 4.81981500  | 1.77644300  | -1.24418000 |

|   |             |             |             |
|---|-------------|-------------|-------------|
| C | 6.20360200  | -0.04444300 | 0.37659000  |
| H | 4.65292400  | 0.34280000  | 1.84275900  |
| C | 5.98768300  | 1.16273900  | -1.71717300 |
| H | 4.26106400  | 2.47004900  | -1.87532400 |
| C | 6.68805900  | 0.25073500  | -0.90732100 |
| H | 6.73397900  | -0.75755800 | 1.01305900  |
| H | 6.34993000  | 1.38888300  | -2.72295400 |
| H | 7.59492100  | -0.23182900 | -1.27903000 |
| C | -4.38174800 | 0.84537000  | -2.59965400 |
| H | -3.85489000 | 0.46322400  | -3.48295400 |
| H | -4.90248600 | 0.00662600  | -2.11726200 |
| H | -5.15409400 | 1.55306000  | -2.95632300 |

**TS6a**

|    |            |             |             |
|----|------------|-------------|-------------|
| C  | 2.18019200 | 2.63317800  | -2.65505000 |
| C  | 3.27769800 | 3.18068900  | -1.90970400 |
| C  | 3.04273400 | 2.91396100  | -0.51861800 |
| C  | 1.79113500 | 2.20435800  | -0.38748700 |
| C  | 1.27404100 | 2.02482000  | -1.72465500 |
| H  | 2.08797700 | 2.62100100  | -3.73894900 |
| H  | 4.16600700 | 3.65072100  | -2.32747000 |
| H  | 3.72775700 | 3.15716800  | 0.28602600  |
| H  | 0.35699600 | 1.49893200  | -1.96194600 |
| Fe | 3.12271100 | 1.18126000  | -1.57449900 |
| C  | 4.42714800 | -0.07353100 | -0.64725800 |
| C  | 5.01335000 | 0.47493700  | -1.83805500 |
| C  | 3.23400700 | -0.80014900 | -1.01300700 |
| H  | 4.80211700 | 0.04989900  | 0.36476100  |
| C  | 4.17561400 | 0.11462800  | -2.94753800 |
| H  | 5.89559300 | 1.11045900  | -1.88143300 |
| C  | 3.07827900 | -0.66120400 | -2.44307100 |



|   |             |             |             |
|---|-------------|-------------|-------------|
| H | 4.31107000  | 0.43093500  | -3.98003500 |
| H | 2.23864300  | -1.03347700 | -3.02277900 |
| C | 1.35745400  | -2.93230400 | -1.12293100 |
| C | 0.20922300  | -3.72646700 | -0.48042500 |
| C | 2.32506600  | -3.88011400 | -1.85373100 |
| H | 0.91058200  | -2.26247400 | -1.87032600 |
| H | -0.55445200 | -3.04326200 | -0.08463600 |
| H | -0.25645100 | -4.38219100 | -1.23562000 |
| H | 0.56894300  | -4.36264100 | 0.34595300  |
| H | 3.14223700  | -3.33369300 | -2.34859900 |
| H | 2.76778400  | -4.61170800 | -1.15874700 |
| H | 1.76977300  | -4.43788100 | -2.62686600 |
| C | 3.39022400  | -2.84527700 | 1.05227600  |
| C | 3.80056500  | -2.16796200 | 2.37644500  |
| C | 4.65094500  | -3.31507300 | 0.26662900  |
| H | 2.76805300  | -3.72128300 | 1.30309500  |
| H | 2.92483700  | -1.82679900 | 2.94044600  |
| H | 4.38217800  | -2.87185900 | 2.99714800  |
| H | 4.43966400  | -1.29142700 | 2.17648500  |
| H | 4.63183700  | -3.01373000 | -0.79667300 |
| H | 5.56727200  | -2.87342800 | 0.71249800  |
| H | 4.75180600  | -4.41846400 | 0.30738700  |
| C | 1.86443300  | 2.28680700  | 2.56068300  |
| C | 2.17197400  | 3.79543800  | 2.66024100  |
| C | 3.14361200  | 1.43117400  | 2.67509900  |
| H | 1.21981100  | 2.01997800  | 3.41592600  |
| H | 1.25991300  | 4.38984400  | 2.80192300  |
| H | 2.82879300  | 3.97375500  | 3.52972600  |
| H | 2.68054900  | 4.18018100  | 1.76680300  |
| H | 2.88324700  | 0.36473300  | 2.70282900  |

|    |             |             |             |
|----|-------------|-------------|-------------|
| H  | 3.81175400  | 1.59245600  | 1.81574700  |
| H  | 3.69408100  | 1.69309800  | 3.59564200  |
| C  | -0.63282600 | 2.85745700  | 0.99780700  |
| C  | -0.40142800 | 4.23679300  | 0.35098900  |
| C  | -1.26966700 | 3.00395100  | 2.39318800  |
| H  | -1.32956100 | 2.30568400  | 0.34929500  |
| H  | 0.00574500  | 4.14108500  | -0.66538700 |
| H  | -1.36809300 | 4.76639500  | 0.28631700  |
| H  | 0.29062100  | 4.85657700  | 0.93952900  |
| H  | -1.37056900 | 2.03597600  | 2.90449700  |
| H  | -0.66993800 | 3.66377800  | 3.03770800  |
| H  | -2.27052700 | 3.45211100  | 2.29411900  |
| P  | 2.14805800  | -1.74009900 | 0.12553100  |
| P  | 0.84824400  | 1.66702500  | 1.09053600  |
| Pd | 0.48968100  | -0.68177800 | 1.41461000  |
| C  | -0.28307500 | -2.29680300 | 2.63042600  |
| H  | -0.37015700 | -3.21476300 | 2.04728600  |
| C  | -1.37956100 | -1.37964600 | 2.54774400  |
| C  | -2.51244200 | -1.82353100 | 1.69224400  |
| H  | -3.45674900 | -1.92129400 | 2.24812800  |
| H  | -2.31400400 | -2.73064300 | 1.11350900  |
| C  | -1.76581400 | -0.53345800 | 3.75965900  |
| H  | -0.88057600 | -0.10512900 | 4.25342900  |
| H  | -2.43152800 | 0.29166000  | 3.47939000  |
| H  | -2.30554600 | -1.15059100 | 4.50654400  |
| C  | -0.24482800 | 0.07978400  | -4.31745400 |
| H  | 0.69391800  | 0.65942000  | -4.24437000 |
| H  | -0.29931000 | -0.38362900 | -5.31400500 |
| H  | -1.09893200 | 0.77405900  | -4.19998700 |
| O  | -0.28095500 | -0.97272900 | -3.35274500 |

|   |             |             |             |
|---|-------------|-------------|-------------|
| C | -3.90268300 | -2.15893100 | -1.40559700 |
| C | -4.35054300 | -1.51730200 | -0.22671700 |
| C | -5.62274100 | -1.80151900 | 0.27262200  |
| C | -6.44032900 | -2.71706300 | -0.41797700 |
| C | -5.97745300 | -3.34820700 | -1.58722000 |
| C | -4.69313400 | -3.07826800 | -2.10101500 |
| C | -2.22451000 | -0.70444100 | -0.80435900 |
| H | -5.98480500 | -1.30781700 | 1.17938500  |
| H | -7.44211200 | -2.93845300 | -0.04539200 |
| H | -6.62187700 | -4.05651900 | -2.11164100 |
| H | -4.33434400 | -3.56294600 | -3.01092600 |
| N | -2.61327300 | -1.69053000 | -1.69958300 |
| H | -2.08562700 | -1.84401900 | -2.56068000 |
| O | -1.21266300 | 0.00403900  | -0.94655800 |
| C | -3.24185900 | -0.67982700 | 0.30210900  |
| H | -0.38348000 | -0.54405100 | -2.46395800 |
| C | -3.51498400 | 0.64369100  | 0.98340800  |
| H | -2.56152400 | 0.98412400  | 1.40990000  |
| H | -4.18276600 | 0.46104600  | 1.84262800  |
| C | -4.10468200 | 1.76228100  | 0.13172800  |
| C | -4.50166500 | 2.95319500  | 0.77523600  |
| C | -4.25045100 | 1.68208100  | -1.26503000 |
| C | -4.99790400 | 4.04299400  | 0.04701000  |
| H | -4.42023200 | 3.01975300  | 1.86301000  |
| C | -4.75040400 | 2.76980900  | -2.00019800 |
| H | -3.98560300 | 0.76527600  | -1.79052500 |
| C | -5.11890100 | 3.95667400  | -1.35027100 |
| H | -5.29469900 | 4.95554900  | 0.56902200  |
| H | -4.85398100 | 2.68386500  | -3.08423900 |
| H | -5.50498400 | 4.80237400  | -1.92321500 |

|   |             |             |            |
|---|-------------|-------------|------------|
| C | 0.51806800  | -2.47441800 | 3.91331700 |
| H | 1.38180900  | -3.13451300 | 3.74219300 |
| H | 0.89404000  | -1.51305500 | 4.29929100 |
| H | -0.10473200 | -2.93098800 | 4.70729700 |

**3**

|   |             |             |             |
|---|-------------|-------------|-------------|
| C | -0.28307500 | -2.29680300 | 2.63042600  |
| H | -0.37015700 | -3.21476300 | 2.04728600  |
| C | -1.37956100 | -1.37964600 | 2.54774400  |
| C | -2.51244200 | -1.82353100 | 1.69224400  |
| H | -3.45674900 | -1.92129400 | 2.24812800  |
| H | -2.31400400 | -2.73064300 | 1.11350900  |
| C | -1.76581400 | -0.53345800 | 3.75965900  |
| H | -0.88057600 | -0.10512900 | 4.25342900  |
| H | -2.43152800 | 0.29166000  | 3.47939000  |
| H | -2.30554600 | -1.15059100 | 4.50654400  |
| C | -3.90268300 | -2.15893100 | -1.40559700 |
| C | -4.35054300 | -1.51730200 | -0.22671700 |
| C | -5.62274100 | -1.80151900 | 0.27262200  |
| C | -6.44032900 | -2.71706300 | -0.41797700 |
| C | -5.97745300 | -3.34820700 | -1.58722000 |
| C | -4.69313400 | -3.07826800 | -2.10101500 |
| C | -2.22451000 | -0.70444100 | -0.80435900 |
| H | -5.98480500 | -1.30781700 | 1.17938500  |
| H | -7.44211200 | -2.93845300 | -0.04539200 |
| H | -6.62187700 | -4.05651900 | -2.11164100 |
| H | -4.33434400 | -3.56294600 | -3.01092600 |
| N | -2.61327300 | -1.69053000 | -1.69958300 |
| H | -2.08562700 | -1.84401900 | -2.56068000 |
| O | -1.21266300 | 0.00403900  | -0.94655800 |
| C | -3.24185900 | -0.67982700 | 0.30210900  |

|   |             |             |             |
|---|-------------|-------------|-------------|
| C | -3.51498400 | 0.64369100  | 0.98340800  |
| H | -2.56152400 | 0.98412400  | 1.40990000  |
| H | -4.18276600 | 0.46104600  | 1.84262800  |
| C | -4.10468200 | 1.76228100  | 0.13172800  |
| C | -4.50166500 | 2.95319500  | 0.77523600  |
| C | -4.25045100 | 1.68208100  | -1.26503000 |
| C | -4.99790400 | 4.04299400  | 0.04701000  |
| H | -4.42023200 | 3.01975300  | 1.86301000  |
| C | -4.75040400 | 2.76980900  | -2.00019800 |
| H | -3.98560300 | 0.76527600  | -1.79052500 |
| C | -5.11890100 | 3.95667400  | -1.35027100 |
| H | -5.29469900 | 4.95554900  | 0.56902200  |
| H | -4.85398100 | 2.68386500  | -3.08423900 |
| H | -5.50498400 | 4.80237400  | -1.92321500 |
| C | 0.51806800  | -2.47441800 | 3.91331700  |
| H | 1.38180900  | -3.13451300 | 3.74219300  |
| H | 0.89404000  | -1.51305500 | 4.29929100  |
| H | -0.10473200 | -2.93098800 | 4.70729700  |

**Int1b**

|   |             |             |            |
|---|-------------|-------------|------------|
| C | -3.16558600 | 0.33869200  | 1.70048800 |
| H | -3.73053100 | 1.26041400  | 1.55214400 |
| C | -3.96735700 | -0.90727700 | 1.65229400 |
| C | -5.46132900 | -0.70643100 | 1.51305900 |
| H | -5.67180000 | -0.13923900 | 0.59053300 |
| H | -5.99934800 | -1.66642900 | 1.47362200 |
| H | -5.86152600 | -0.11274600 | 2.35459500 |
| C | -1.86031000 | 0.42118800  | 2.21110600 |
| H | -1.39323800 | -0.44599300 | 2.67971400 |
| H | -1.43788800 | 1.39330600  | 2.47623100 |

|    |             |             |             |
|----|-------------|-------------|-------------|
| Pd | -1.62486200 | 0.27503200  | 0.03194000  |
| C  | 1.32771600  | -1.67172200 | -0.88182700 |
| C  | 2.70815100  | -1.83744100 | -1.16431900 |
| C  | 0.45280200  | -2.73461800 | -1.21937000 |
| C  | 3.20212300  | -2.99428300 | -1.79722900 |
| C  | 0.93921100  | -3.89905200 | -1.85610900 |
| C  | 2.30338500  | -4.01187200 | -2.14010400 |
| H  | 4.26281800  | -3.10212100 | -2.01781500 |
| H  | 0.26169300  | -4.70608900 | -2.12785700 |
| H  | 2.67478300  | -4.91251400 | -2.63400300 |
| O  | -0.86484000 | -2.58243300 | -0.89113000 |
| O  | 3.50229200  | -0.79740500 | -0.78572300 |
| C  | 4.90681500  | -0.88846000 | -0.98153800 |
| H  | 5.31394200  | 0.03989200  | -0.56332800 |
| H  | 5.32994200  | -1.76027000 | -0.45079900 |
| H  | 5.15758100  | -0.96352000 | -2.05540300 |
| C  | -1.74757100 | -3.68821400 | -1.05263900 |
| H  | -1.36135200 | -4.58359400 | -0.53253600 |
| H  | -2.69255600 | -3.36893900 | -0.59818600 |
| H  | -1.90006900 | -3.92991500 | -2.11978500 |
| P  | 0.71169400  | -0.16640300 | 0.01645800  |
| C  | 1.66780900  | -0.37917400 | 1.60799500  |
| C  | 2.76686300  | 0.38687600  | 2.07925300  |
| C  | 1.20550000  | -1.42362300 | 2.45447500  |
| C  | 3.27826400  | 0.20484000  | 3.38260900  |
| C  | 1.71987000  | -1.62338100 | 3.74939700  |
| C  | 2.74461600  | -0.78803300 | 4.20843000  |
| H  | 4.11198000  | 0.81231700  | 3.73193400  |
| H  | 1.33041200  | -2.41373700 | 4.38822700  |
| H  | 3.14612300  | -0.92883000 | 5.21408100  |

|   |             |             |             |
|---|-------------|-------------|-------------|
| C | 1.34980000  | 1.35304400  | -0.83058200 |
| C | 1.73573200  | 1.42199600  | -2.19174700 |
| C | 1.24299000  | 2.57831200  | -0.12101900 |
| C | 2.11090000  | 2.64641700  | -2.78351000 |
| C | 1.60767200  | 3.80529800  | -0.70291900 |
| C | 2.05192300  | 3.82340700  | -2.03009000 |
| H | 2.42222800  | 2.68447800  | -3.82574500 |
| H | 1.51460600  | 4.73380900  | -0.14401200 |
| H | 2.32996800  | 4.77272100  | -2.49229300 |
| O | 0.23078500  | -2.22472100 | 1.91572300  |
| O | 3.34194100  | 1.27075400  | 1.21008200  |
| O | 1.68537100  | 0.24958400  | -2.89870200 |
| O | 0.77473300  | 2.46895900  | 1.16098600  |
| C | -0.12477900 | -3.41993200 | 2.60594900  |
| H | 0.76885600  | -4.03271400 | 2.81724300  |
| H | -0.65128800 | -3.19659700 | 3.55059800  |
| H | -0.79924000 | -3.95734900 | 1.92883100  |
| C | 4.08725400  | 2.36283700  | 1.73830900  |
| H | 3.54804400  | 2.84754900  | 2.57043500  |
| H | 5.08359900  | 2.04143400  | 2.09446000  |
| H | 4.19800400  | 3.06881200  | 0.90446900  |
| C | 2.19244800  | 0.22336100  | -4.22699100 |
| H | 3.24409600  | 0.56149900  | -4.26075200 |
| H | 2.12734200  | -0.82613800 | -4.54170400 |
| H | 1.58875200  | 0.85712200  | -4.90150800 |
| C | 0.60202600  | 3.65852800  | 1.93259800  |
| H | 1.56581900  | 4.17920900  | 2.07530000  |
| H | -0.12687300 | 4.32308500  | 1.44525500  |
| H | 0.21986100  | 3.31750800  | 2.90350400  |
| C | -2.90317200 | 0.98087600  | -1.76435000 |

|   |             |             |             |
|---|-------------|-------------|-------------|
| H | -2.90204000 | 2.06992500  | -1.67270700 |
| C | -1.70705900 | 0.37550600  | -2.17921100 |
| H | -0.87586800 | 1.00682800  | -2.49555100 |
| H | -1.68853500 | -0.65624400 | -2.53639300 |
| C | -4.32611200 | -1.14866500 | -1.85135000 |
| H | -5.37080800 | -1.48251600 | -1.94506900 |
| H | -3.75446900 | -1.53803500 | -2.71069400 |
| H | -3.89184600 | -1.58674500 | -0.93976200 |
| C | -3.07488900 | 3.68887400  | 0.63600800  |
| H | -3.40740700 | 4.73531500  | 0.55646300  |
| H | -3.85410800 | 3.03440500  | 0.20214000  |
| H | -2.96711900 | 3.43460000  | 1.70959800  |
| O | -1.84184800 | 3.58894800  | -0.06849100 |
| H | -1.56127500 | 2.64382100  | -0.00649900 |
| C | -4.23609000 | 0.35909000  | -1.77468500 |
| C | -5.35100300 | 1.12949000  | -1.72222800 |
| C | -3.41911100 | -2.14454700 | 1.71073400  |
| H | -6.34955500 | 0.68706700  | -1.75101900 |
| H | -5.28450400 | 2.21878600  | -1.65776000 |
| H | -4.04534400 | -3.04023600 | 1.70865900  |
| H | -2.33810700 | -2.26973600 | 1.72972700  |

**TS1b**

|   |            |             |            |
|---|------------|-------------|------------|
| C | 3.21516600 | -0.57242100 | 1.74528900 |
| H | 3.06314800 | -1.64015400 | 1.93399900 |
| C | 4.54742600 | -0.20018500 | 1.38856800 |
| C | 4.91436700 | 1.06978400  | 0.92664500 |
| H | 5.95833900 | 1.37803800  | 1.03256000 |
| H | 4.18458100 | 1.88205100  | 0.97409700 |
| C | 5.61315600 | -1.28197200 | 1.36379300 |
| H | 5.85415900 | -1.59425000 | 0.32841100 |



|    |             |             |             |
|----|-------------|-------------|-------------|
| H  | 6.55547300  | -0.91897500 | 1.80871800  |
| H  | 5.29823200  | -2.18200400 | 1.91475100  |
| C  | 2.10505300  | 0.26069200  | 2.01722600  |
| H  | 2.26631200  | 1.33711500  | 2.13460300  |
| H  | 1.29319200  | -0.15097700 | 2.62123300  |
| Pd | 1.56568800  | -0.00303500 | -0.07025400 |
| C  | -1.55623000 | 1.74106100  | -0.42037100 |
| C  | -2.95964000 | 1.80775000  | -0.62126800 |
| C  | -0.82593200 | 2.95245500  | -0.48026400 |
| C  | -3.60942100 | 3.02223300  | -0.91323200 |
| C  | -1.46871900 | 4.17704500  | -0.76751200 |
| C  | -2.84924200 | 4.19602300  | -0.98583400 |
| H  | -4.68539800 | 3.05505300  | -1.07606800 |
| H  | -0.89833700 | 5.10237300  | -0.82227600 |
| H  | -3.34358500 | 5.14335900  | -1.21178200 |
| O  | 0.51864900  | 2.88070000  | -0.23684300 |
| O  | -3.61554400 | 0.61943700  | -0.50848800 |
| C  | -5.03395800 | 0.59744100  | -0.59619700 |
| H  | -5.31509200 | -0.44604800 | -0.41054300 |
| H  | -5.49186400 | 1.25440200  | 0.16489800  |
| H  | -5.37879800 | 0.91126400  | -1.59835300 |
| C  | 1.22974700  | 4.08436600  | 0.03348500  |
| H  | 0.73709600  | 4.65982300  | 0.83716500  |
| H  | 2.23009500  | 3.76335000  | 0.34875600  |
| H  | 1.31692200  | 4.71819700  | -0.86668600 |
| P  | -0.74356200 | 0.14540000  | 0.07898300  |
| C  | -1.63264700 | -0.11360300 | 1.70468000  |
| C  | -2.60448300 | -1.10063700 | 2.02013800  |
| C  | -1.23191500 | 0.74999400  | 2.76174800  |
| C  | -3.02191300 | -1.31406800 | 3.35157000  |

|   |             |             |             |
|---|-------------|-------------|-------------|
| C | -1.64553000 | 0.54709200  | 4.09271700  |
| C | -2.52645600 | -0.50228800 | 4.37612300  |
| H | -3.75350400 | -2.08852000 | 3.57763200  |
| H | -1.30170100 | 1.20367000  | 4.88965800  |
| H | -2.85276500 | -0.67040600 | 5.40458500  |
| C | -1.27783800 | -1.19504500 | -1.08127900 |
| C | -1.71339900 | -0.98553500 | -2.41199600 |
| C | -1.01462900 | -2.53106700 | -0.68440600 |
| C | -2.00519800 | -2.07240900 | -3.26244400 |
| C | -1.29501800 | -3.62239600 | -1.52490800 |
| C | -1.80477400 | -3.37936000 | -2.80574100 |
| H | -2.35959800 | -1.90125000 | -4.27718600 |
| H | -1.08641800 | -4.64013900 | -1.20277100 |
| H | -2.01938700 | -4.21997500 | -3.46862100 |
| O | -0.43608400 | 1.79759100  | 2.38664200  |
| O | -3.14651800 | -1.80884200 | 0.98470300  |
| O | -1.79302900 | 0.31634400  | -2.82869500 |
| O | -0.46981500 | -2.66869900 | 0.56620400  |
| C | 0.17706500  | 2.58807100  | 3.39836400  |
| H | -0.57803800 | 3.14273900  | 3.98379700  |
| H | 0.78431600  | 1.96232200  | 4.07465500  |
| H | 0.82579700  | 3.29325400  | 2.86507800  |
| C | -3.72981700 | -3.07920900 | 1.25632000  |
| H | -3.08119200 | -3.68234600 | 1.91470700  |
| H | -4.72480700 | -2.97702600 | 1.72779500  |
| H | -3.82689500 | -3.56942500 | 0.27853200  |
| C | -2.35618900 | 0.59699000  | -4.10398400 |
| H | -3.37587900 | 0.17989200  | -4.19179900 |
| H | -2.39388100 | 1.69196500  | -4.17069700 |
| H | -1.72958000 | 0.19135400  | -4.91867700 |

|   |             |             |             |
|---|-------------|-------------|-------------|
| C | -0.12673600 | -3.97800900 | 1.02168800  |
| H | -1.02558800 | -4.61499500 | 1.10464300  |
| H | 0.60361900  | -4.43663900 | 0.33855400  |
| H | 0.31531800  | -3.83010600 | 2.01531400  |
| C | 5.06907800  | 0.93193900  | -1.20003900 |
| H | 5.74107400  | 1.78842300  | -1.30618200 |
| H | 5.56781800  | -0.04074500 | -1.18117400 |
| C | 3.79611600  | 1.02054500  | -1.77583700 |
| C | 2.97663800  | -0.14634500 | -1.92047900 |
| H | 3.46882500  | -1.11248700 | -1.78289900 |
| C | 1.61230600  | -0.16159300 | -2.29291800 |
| H | 1.15790700  | -1.10824000 | -2.58820700 |
| H | 1.13151000  | 0.73389400  | -2.69179200 |
| C | 3.24411300  | 2.37231200  | -2.18227200 |
| H | 3.25445800  | 2.48312500  | -3.28286800 |
| H | 2.20286700  | 2.49291900  | -1.85564300 |
| H | 3.84675500  | 3.19135900  | -1.75754300 |
| C | 3.26081000  | -3.49052500 | -0.26583800 |
| H | 3.74816000  | -4.37802000 | -0.69832500 |
| H | 3.97839400  | -2.65331900 | -0.26253300 |
| H | 2.99330700  | -3.71625200 | 0.78714500  |
| O | 2.11866900  | -3.21102200 | -1.06694000 |
| H | 1.73767400  | -2.36783400 | -0.73360000 |

**Int2b**

|   |            |             |             |
|---|------------|-------------|-------------|
| C | 3.23240800 | 0.31936800  | -1.83694800 |
| H | 3.13620800 | 1.38234500  | -2.08629200 |
| C | 4.49289200 | -0.14519900 | -1.59056700 |
| C | 4.74505400 | -1.55056500 | -1.12664000 |
| H | 5.77203700 | -1.85349700 | -1.39328900 |
| H | 4.06149200 | -2.26565600 | -1.61179900 |

|    |             |             |             |
|----|-------------|-------------|-------------|
| C  | 5.69804700  | 0.76603900  | -1.64037300 |
| H  | 5.41552100  | 1.79668700  | -1.91237600 |
| H  | 6.21719400  | 0.80625400  | -0.66136900 |
| H  | 6.45027700  | 0.41320400  | -2.37204400 |
| C  | 1.97956700  | -0.43048700 | -1.74967600 |
| H  | 2.06599400  | -1.50227800 | -1.99067500 |
| H  | 1.16463400  | 0.03129200  | -2.31713600 |
| Pd | 1.45418800  | -0.48804800 | 0.34743100  |
| C  | -1.83869200 | 0.02484400  | 1.46897500  |
| C  | -2.99490500 | -0.78005000 | 1.64125300  |
| C  | -1.43356000 | 0.82630400  | 2.57284500  |
| C  | -3.64292400 | -0.86657600 | 2.89218600  |
| C  | -2.08222000 | 0.75119000  | 3.82157700  |
| C  | -3.17491600 | -0.10893900 | 3.96999500  |
| H  | -4.52266700 | -1.49645600 | 3.01399700  |
| H  | -1.74711500 | 1.35737500  | 4.66041200  |
| H  | -3.68177200 | -0.17440500 | 4.93507500  |
| O  | -0.38628200 | 1.66950900  | 2.33322500  |
| O  | -3.47359900 | -1.43885800 | 0.54199100  |
| C  | -4.38399300 | -2.51513100 | 0.72905800  |
| H  | -4.01797100 | -3.22249200 | 1.49405300  |
| H  | -5.38567600 | -2.15446400 | 1.02839000  |
| H  | -4.44450400 | -3.01664500 | -0.24597400 |
| C  | 0.07053900  | 2.51593500  | 3.39243000  |
| H  | -0.73777000 | 3.19052600  | 3.72530400  |
| H  | 0.42431500  | 1.91528000  | 4.24805000  |
| H  | 0.90771800  | 3.08009000  | 2.97164700  |
| P  | -0.72917500 | 0.13937600  | -0.02329000 |
| C  | -1.26340400 | -1.13351800 | -1.26294500 |
| C  | -1.48342300 | -0.86452500 | -2.63625000 |

|   |             |             |             |
|---|-------------|-------------|-------------|
| C | -1.25745500 | -2.49452100 | -0.85958000 |
| C | -1.78978000 | -1.90080800 | -3.54454800 |
| C | -1.55888300 | -3.53502100 | -1.75653800 |
| C | -1.83392200 | -3.22274500 | -3.09421100 |
| H | -1.97444500 | -1.67912900 | -4.59386500 |
| H | -1.56538400 | -4.57221500 | -1.42681900 |
| H | -2.06550200 | -4.02467000 | -3.79814300 |
| C | -1.20890500 | 1.82256700  | -0.63319400 |
| C | -2.57261500 | 2.12730700  | -0.87805000 |
| C | -0.26162700 | 2.86899100  | -0.76653300 |
| C | -2.99705200 | 3.43143000  | -1.19404700 |
| C | -0.68130500 | 4.18278200  | -1.07902400 |
| C | -2.03847500 | 4.44757400  | -1.28292700 |
| H | -4.04813000 | 3.64903400  | -1.37592500 |
| H | 0.04131900  | 4.99188400  | -1.15701800 |
| H | -2.35462000 | 5.46543900  | -1.52164300 |
| O | -0.94505800 | -2.71883200 | 0.45671500  |
| O | -1.35883300 | 0.43968300  | -3.02826100 |
| O | -3.42371500 | 1.06439400  | -0.81016300 |
| O | 1.05041100  | 2.54678500  | -0.58321800 |
| C | -1.04161600 | -4.04517900 | 0.96377900  |
| H | -2.06106300 | -4.44808100 | 0.83119000  |
| H | -0.31814900 | -4.71689100 | 0.46968400  |
| H | -0.80599800 | -3.96807500 | 2.03273200  |
| C | -1.65838400 | 0.79075300  | -4.37409500 |
| H | -0.95966500 | 0.30679700  | -5.07970400 |
| H | -2.69388800 | 0.51086400  | -4.63938900 |
| H | -1.54259400 | 1.88110500  | -4.42068600 |
| C | -4.82593300 | 1.29824400  | -0.84386800 |
| H | -5.28338700 | 0.31764600  | -0.66618100 |

|   |             |             |             |
|---|-------------|-------------|-------------|
| H | -5.13094400 | 2.00790900  | -0.05449600 |
| H | -5.14378000 | 1.69143300  | -1.82675100 |
| C | 2.02891100  | 3.57555500  | -0.73618600 |
| H | 2.99445900  | 3.07643700  | -0.62688200 |
| H | 1.95600600  | 4.03896900  | -1.73600900 |
| H | 1.91731200  | 4.34740100  | 0.04310400  |
| C | 4.59740100  | -1.71324800 | 0.43756100  |
| H | 5.20891100  | -2.59077200 | 0.72218800  |
| H | 5.04620600  | -0.83382200 | 0.92695300  |
| C | 3.19535200  | -1.93692800 | 0.93945500  |
| C | 2.71593500  | -1.15853200 | 2.03449100  |
| H | 3.36741500  | -0.35162200 | 2.37876800  |
| C | 1.39214300  | -1.15813000 | 2.52784400  |
| H | 1.11568000  | -0.42049400 | 3.27994700  |
| H | 0.73403800  | -2.02334000 | 2.43757300  |
| C | 2.60248200  | -3.29216900 | 0.58973200  |
| H | 3.21035900  | -4.10500500 | 1.03558800  |
| H | 1.57052200  | -3.38687700 | 0.94604400  |
| H | 2.59497800  | -3.44793900 | -0.50146600 |
| C | 4.13430900  | 1.95801400  | 1.41710700  |
| H | 4.75717100  | 1.37295300  | 2.12303600  |
| H | 4.10196000  | 1.41583200  | 0.45990400  |
| H | 4.62438600  | 2.93611600  | 1.26483300  |
| O | 2.82445800  | 2.17846300  | 1.94080000  |
| H | 2.20855400  | 1.57462100  | 1.47374000  |

**TS2**

|   |            |             |             |
|---|------------|-------------|-------------|
| C | 3.29231600 | 0.96959800  | -1.57321000 |
| H | 3.27268100 | 2.04246000  | -1.36380300 |
| C | 4.51260000 | 0.35676700  | -1.55088000 |
| C | 4.66500300 | -1.12845300 | -1.66820300 |

|    |             |             |             |
|----|-------------|-------------|-------------|
| H  | 5.65032400  | -1.37530100 | -2.09828900 |
| H  | 3.89983100  | -1.57639700 | -2.32122600 |
| C  | 5.77153800  | 1.13088900  | -1.24570700 |
| H  | 5.55560600  | 2.19447000  | -1.06039000 |
| H  | 6.28262700  | 0.72990500  | -0.34711000 |
| H  | 6.50448100  | 1.06414300  | -2.07286000 |
| C  | 1.99131200  | 0.33368500  | -1.75616900 |
| H  | 1.99309700  | -0.58010800 | -2.37024000 |
| H  | 1.20208400  | 1.02571200  | -2.07002700 |
| Pd | 1.47436600  | -0.44094600 | 0.19617700  |
| C  | -1.72764500 | -0.35304100 | 1.53582500  |
| C  | -2.82437200 | -1.24860300 | 1.61649900  |
| C  | -1.21343500 | 0.17256300  | 2.75289300  |
| C  | -3.31948200 | -1.66646100 | 2.87082100  |
| C  | -1.70379100 | -0.23981300 | 4.00683400  |
| C  | -2.75091600 | -1.16551200 | 4.04858300  |
| H  | -4.15634000 | -2.36020100 | 2.93052500  |
| H  | -1.28619800 | 0.17306000  | 4.92349900  |
| H  | -3.14605200 | -1.49043500 | 5.01347600  |
| O  | -0.22754900 | 1.09544800  | 2.60339300  |
| O  | -3.37823100 | -1.67716800 | 0.44018600  |
| C  | -4.28674100 | -2.77037500 | 0.47130000  |
| H  | -3.86003100 | -3.63425100 | 1.01151300  |
| H  | -5.24383900 | -2.49075100 | 0.94934500  |
| H  | -4.45927500 | -3.03493600 | -0.58041200 |
| C  | 0.62993400  | 1.40873200  | 3.71182500  |
| H  | 0.10944800  | 2.07457600  | 4.42292000  |
| H  | 0.93400400  | 0.48541300  | 4.23407200  |
| H  | 1.50515900  | 1.89219900  | 3.25403600  |
| P  | -0.76346500 | 0.19978000  | 0.05083400  |

|   |             |             |             |
|---|-------------|-------------|-------------|
| C | -1.27110500 | -0.79554000 | -1.43431200 |
| C | -1.52641900 | -0.22423400 | -2.70865600 |
| C | -1.22350300 | -2.21177200 | -1.36020500 |
| C | -1.84344600 | -1.03207400 | -3.82180700 |
| C | -1.53191400 | -3.02650100 | -2.46468100 |
| C | -1.85290600 | -2.42268700 | -3.68612000 |
| H | -2.05965800 | -0.57934400 | -4.78746000 |
| H | -1.50522200 | -4.11132600 | -2.38237300 |
| H | -2.09136900 | -3.04701100 | -4.54952200 |
| C | -1.41165200 | 1.91899100  | -0.17802500 |
| C | -2.80872100 | 2.12773400  | -0.31271100 |
| C | -0.56389700 | 3.05671600  | -0.20160200 |
| C | -3.36031200 | 3.41861500  | -0.41089900 |
| C | -1.11341600 | 4.35625400  | -0.31301800 |
| C | -2.49735100 | 4.52084700  | -0.40689500 |
| H | -4.43519500 | 3.56160100  | -0.50559500 |
| H | -0.46429600 | 5.22851600  | -0.32766900 |
| H | -2.91234400 | 5.52804400  | -0.48747100 |
| O | -0.84294900 | -2.72630800 | -0.14907600 |
| O | -1.42464500 | 1.13369600  | -2.79840300 |
| O | -3.56284100 | 0.99299300  | -0.37694100 |
| O | 0.76974400  | 2.83178600  | -0.12556900 |
| C | -0.92125500 | -4.13298700 | 0.05364800  |
| H | -1.94283600 | -4.50415600 | -0.14127500 |
| H | -0.20734600 | -4.67121400 | -0.59063100 |
| H | -0.66219100 | -4.29292200 | 1.10955000  |
| C | -1.79964800 | 1.78536100  | -4.00780000 |
| H | -1.12830100 | 1.50406700  | -4.83852600 |
| H | -2.84168100 | 1.54407700  | -4.28337300 |
| H | -1.70676600 | 2.85784800  | -3.79601900 |



|   |             |             |             |
|---|-------------|-------------|-------------|
| C | -4.98007100 | 1.10210600  | -0.34768100 |
| H | -5.34582500 | 0.06892300  | -0.31830800 |
| H | -5.31964200 | 1.65082000  | 0.54861700  |
| H | -5.36153100 | 1.61296100  | -1.25049500 |
| C | 1.65392200  | 3.95827100  | -0.07143000 |
| H | 2.63743600  | 3.52547800  | 0.12888200  |
| H | 1.62586500  | 4.51708400  | -1.02434100 |
| H | 1.37726600  | 4.62946600  | 0.75919500  |
| C | 4.58087600  | -1.83853600 | -0.25210200 |
| H | 5.12748800  | -2.79617900 | -0.35074200 |
| H | 5.12243000  | -1.22257500 | 0.48085500  |
| C | 3.19521600  | -2.14552300 | 0.22882000  |
| C | 2.77721000  | -1.69787000 | 1.51287400  |
| H | 3.47925000  | -1.05856800 | 2.05047400  |
| C | 1.47844700  | -1.83367100 | 2.04409200  |
| H | 1.24442900  | -1.38412400 | 3.00873900  |
| H | 0.79102800  | -2.60017600 | 1.68816500  |
| C | 2.47273000  | -3.28749400 | -0.48637000 |
| H | 2.30017000  | -4.12288600 | 0.21414300  |
| H | 1.48110300  | -2.99595400 | -0.89063600 |
| H | 3.08683800  | -3.65630900 | -1.32614400 |
| C | 4.17644200  | 1.39629800  | 2.20456100  |
| H | 4.00419500  | 0.72504800  | 3.08199900  |
| H | 4.68070300  | 0.79637200  | 1.41848000  |
| H | 4.89807800  | 2.17265300  | 2.53750400  |
| O | 3.01932900  | 2.03860900  | 1.75167000  |
| H | 2.18529700  | 1.00089400  | 1.01969100  |

**Int3b**

|   |            |            |             |
|---|------------|------------|-------------|
| C | 3.29249300 | 0.97321000 | -1.57113700 |
| H | 3.27232500 | 2.04584500 | -1.36062000 |

|    |             |             |             |
|----|-------------|-------------|-------------|
| C  | 4.51304900  | 0.36090700  | -1.54915500 |
| C  | 4.66615000  | -1.12412200 | -1.66798600 |
| H  | 5.65168400  | -1.37007800 | -2.09809400 |
| H  | 3.90133500  | -1.57173100 | -2.32165600 |
| C  | 5.77156500  | 1.13527900  | -1.24287800 |
| H  | 5.55510900  | 2.19856900  | -1.05650700 |
| H  | 6.28262200  | 0.73359100  | -0.34457700 |
| H  | 6.50473400  | 1.06972300  | -2.06992600 |
| C  | 1.99182000  | 0.33690100  | -1.75506600 |
| H  | 1.99416300  | -0.57625200 | -2.37008700 |
| H  | 1.20235400  | 1.02889800  | -2.06839200 |
| Pd | 1.47476100  | -0.43999200 | 0.19635000  |
| C  | -1.72760700 | -0.35492400 | 1.53532900  |
| C  | -2.82394900 | -1.25106400 | 1.61481100  |
| C  | -1.21392300 | 0.16964600  | 2.75306400  |
| C  | -3.31916700 | -1.67045000 | 2.86858000  |
| C  | -1.70439000 | -0.24425500 | 4.00646000  |
| C  | -2.75110700 | -1.17046900 | 4.04699700  |
| H  | -4.15572600 | -2.36462900 | 2.92736400  |
| H  | -1.28720000 | 0.16785300  | 4.92365200  |
| H  | -3.14632500 | -1.49657300 | 5.01145800  |
| O  | -0.22841800 | 1.09313000  | 2.60475800  |
| O  | -3.37733600 | -1.67865600 | 0.43792200  |
| C  | -4.28536000 | -2.77230400 | 0.46768300  |
| H  | -3.85838800 | -3.63654900 | 1.00709900  |
| H  | -5.24269700 | -2.49360900 | 0.94579100  |
| H  | -4.45752500 | -3.03584900 | -0.58434400 |
| C  | 0.62866100  | 1.40564800  | 3.71371900  |
| H  | 0.10770600  | 2.07051800  | 4.42538200  |
| H  | 0.93302400  | 0.48192400  | 4.23507800  |

|   |             |             |             |
|---|-------------|-------------|-------------|
| H | 1.50377600  | 1.88998600  | 3.25664100  |
| P | -0.76332500 | 0.19987500  | 0.05114200  |
| C | -1.27016300 | -0.79412900 | -1.43515800 |
| C | -1.52543300 | -0.22161400 | -2.70896800 |
| C | -1.22194000 | -2.21041600 | -1.36251200 |
| C | -1.84183200 | -1.02843900 | -3.82303400 |
| C | -1.52972100 | -3.02413500 | -2.46790800 |
| C | -1.85069600 | -2.41919600 | -3.68879500 |
| H | -2.05801900 | -0.57480200 | -4.78826700 |
| H | -1.50255900 | -4.10903300 | -2.38672200 |
| H | -2.08867300 | -3.04273000 | -4.55290200 |
| C | -1.41223300 | 1.91903100  | -0.17608300 |
| C | -2.80936400 | 2.12728300  | -0.31088400 |
| C | -0.56498600 | 3.05716200  | -0.19827600 |
| C | -3.36151400 | 3.41801700  | -0.40786100 |
| C | -1.11506500 | 4.35656700  | -0.30847200 |
| C | -2.49905200 | 4.52063300  | -0.40250600 |
| H | -4.43643900 | 3.56061700  | -0.50266300 |
| H | -0.46633500 | 5.22913600  | -0.32206200 |
| H | -2.91448000 | 5.52772600  | -0.48213300 |
| O | -0.84144100 | -2.72603900 | -0.15182900 |
| O | -1.42425100 | 1.13645500  | -2.79727900 |
| O | -3.56295700 | 0.99227000  | -0.37647300 |
| O | 0.76873800  | 2.83275400  | -0.12216000 |
| C | -0.91916000 | -4.13296300 | 0.04941400  |
| H | -1.94052700 | -4.50439000 | -0.14613700 |
| H | -0.20485600 | -4.67019800 | -0.59525500 |
| H | -0.66027400 | -4.29387900 | 1.10521100  |
| C | -1.79926100 | 1.78920800  | -4.00608700 |
| H | -1.12759000 | 1.50908000  | -4.83694600 |

|   |             |             |             |
|---|-------------|-------------|-------------|
| H | -2.84112000 | 1.54774000  | -4.28215800 |
| H | -1.70691300 | 2.86151600  | -3.79316900 |
| C | -4.98024300 | 1.10071300  | -0.34743600 |
| H | -5.34553700 | 0.06733500  | -0.31922400 |
| H | -5.32027400 | 1.64834200  | 0.54935100  |
| H | -5.36171900 | 1.61233500  | -1.24980900 |
| C | 1.65239500  | 3.95958100  | -0.06664000 |
| H | 2.63605700  | 3.52702400  | 0.13345500  |
| H | 1.62431200  | 4.51937200  | -1.01897600 |
| H | 1.37523900  | 4.62978700  | 0.76461600  |
| C | 4.58200700  | -1.83571400 | -0.25264400 |
| H | 5.12907500  | -2.79300800 | -0.35214900 |
| H | 5.12311000  | -1.22027200 | 0.48108200  |
| C | 3.19637200  | -2.14382600 | 0.22763000  |
| C | 2.77786000  | -1.69769700 | 1.51204900  |
| H | 3.47948400  | -1.05863800 | 2.05048000  |
| C | 1.47903200  | -1.83463600 | 2.04281700  |
| H | 1.24458300  | -1.38619800 | 3.00787600  |
| H | 0.79204400  | -2.60108000 | 1.68593000  |
| C | 2.47457100  | -3.28537900 | -0.48891900 |
| H | 2.30222200  | -4.12157600 | 0.21068500  |
| H | 1.48290800  | -2.99386600 | -0.89311700 |
| H | 3.08904400  | -3.65304300 | -1.32893000 |
| C | 4.17553100  | 1.39638100  | 2.20728500  |
| H | 4.00337900  | 0.72414100  | 3.08398400  |
| H | 4.68024900  | 0.79750000  | 1.42070100  |
| H | 4.89673800  | 2.17271500  | 2.54120600  |
| O | 3.01823600  | 2.03864000  | 1.75478700  |
| H | 2.09413600  | 0.81719100  | 0.91611800  |

**TS3b**

|    |             |             |             |
|----|-------------|-------------|-------------|
| C  | 3.34421600  | 1.04012400  | 1.98176700  |
| H  | 3.12464600  | 0.10122500  | 2.49867200  |
| C  | 3.66138000  | 0.88573500  | 0.53460700  |
| C  | 3.92596700  | 2.19806500  | -0.20993300 |
| H  | 4.86178900  | 2.64835400  | 0.17521400  |
| H  | 3.11542500  | 2.90799300  | 0.02765900  |
| C  | 4.70523500  | -0.22833100 | 0.29583800  |
| H  | 5.44029400  | -0.26534700 | 1.14653700  |
| H  | 4.21393500  | -1.22145700 | 0.17153900  |
| H  | 5.28876100  | -0.03496300 | -0.63954400 |
| C  | 3.33531600  | 2.18002100  | 2.70479400  |
| H  | 3.56128000  | 3.15141800  | 2.26066400  |
| H  | 3.09555400  | 2.16637200  | 3.76831700  |
| Pd | 1.25475800  | -1.11708900 | -0.67670900 |
| C  | -2.22126900 | -1.17185700 | -0.34989800 |
| C  | -3.51909700 | -0.68204200 | -0.66343400 |
| C  | -2.02668300 | -2.57869200 | -0.41544400 |
| C  | -4.52187800 | -1.54879700 | -1.14521000 |
| C  | -3.02223500 | -3.44748700 | -0.90077400 |
| C  | -4.26044300 | -2.91859900 | -1.27549300 |
| H  | -5.50759200 | -1.15979900 | -1.39619200 |
| H  | -2.82945500 | -4.51862800 | -0.95041800 |
| H  | -5.04463400 | -3.58247900 | -1.64547000 |
| O  | -0.83055100 | -3.04663200 | 0.04761300  |
| O  | -3.75342900 | 0.65161700  | -0.47487900 |
| C  | -4.83724200 | 1.25797200  | -1.17124200 |
| H  | -4.67253600 | 2.33991000  | -1.08174600 |
| H  | -4.84029200 | 0.96562200  | -2.23582500 |
| H  | -5.81080800 | 0.98697100  | -0.72305300 |
| C  | -0.22443200 | -4.18098900 | -0.60125800 |

|   |             |             |             |
|---|-------------|-------------|-------------|
| H | -0.47837500 | -4.19247600 | -1.67324500 |
| H | 0.85863700  | -4.03636100 | -0.48681600 |
| H | -0.56425000 | -5.11885600 | -0.12860200 |
| P | -0.69354900 | -0.18326600 | 0.05371400  |
| C | -1.01168700 | 1.58654900  | -0.35436600 |
| C | -0.63841200 | 2.65656400  | 0.49916200  |
| C | -1.50166500 | 1.91857700  | -1.64196300 |
| C | -0.84971400 | 3.99893700  | 0.11740100  |
| C | -1.72401700 | 3.25238000  | -2.02854000 |
| C | -1.40059900 | 4.28134900  | -1.13601800 |
| H | -0.57097400 | 4.81158000  | 0.78519800  |
| H | -2.11324300 | 3.48949100  | -3.01664200 |
| H | -1.55866500 | 5.32009900  | -1.43280200 |
| C | -0.63115000 | -0.40698800 | 1.89741800  |
| C | -1.65061500 | 0.08351300  | 2.75080800  |
| C | 0.40817200  | -1.16610200 | 2.48171100  |
| C | -1.62533800 | -0.15373400 | 4.13815900  |
| C | 0.44586800  | -1.41405800 | 3.86884300  |
| C | -0.57085200 | -0.90096200 | 4.67969800  |
| H | -2.40978400 | 0.23506500  | 4.78521200  |
| H | 1.25792400  | -1.99222400 | 4.30448200  |
| H | -0.54318500 | -1.08772700 | 5.75519100  |
| O | -1.73437500 | 0.85502700  | -2.47631900 |
| O | -0.04556600 | 2.31146100  | 1.67387300  |
| O | -2.62856800 | 0.79685100  | 2.12642300  |
| O | 1.37843300  | -1.64418700 | 1.63954700  |
| C | -2.14465200 | 1.11048100  | -3.81649200 |
| H | -3.12041000 | 1.62695000  | -3.84323500 |
| H | -1.39557600 | 1.72061600  | -4.35092300 |
| H | -2.23200600 | 0.12381100  | -4.28770400 |

|   |             |             |             |
|---|-------------|-------------|-------------|
| C | 0.18906700  | 3.31783900  | 2.65444600  |
| H | 0.93900100  | 4.04716500  | 2.30484500  |
| H | -0.74917600 | 3.84323800  | 2.90945700  |
| H | 0.58130300  | 2.78321700  | 3.52621800  |
| C | -3.75451900 | 1.23012400  | 2.87978800  |
| H | -4.26495600 | 0.37682300  | 3.36073600  |
| H | -3.46032300 | 1.95942900  | 3.65622700  |
| H | -4.42212900 | 1.70500600  | 2.15097400  |
| C | 2.31200900  | -2.63727500 | 2.09426000  |
| H | 3.01769300  | -2.19309900 | 2.81322600  |
| H | 1.76922200  | -3.47429200 | 2.56817600  |
| H | 2.82133700  | -2.95718700 | 1.17766700  |
| C | 4.04651600  | 2.09355200  | -1.76363800 |
| H | 4.29095600  | 3.09874800  | -2.14826200 |
| H | 4.88478300  | 1.43040600  | -2.02468100 |
| C | 2.76031100  | 1.57544500  | -2.36163100 |
| C | 2.61034000  | 0.23639500  | -2.56526400 |
| H | 3.49794000  | -0.38712600 | -2.42858500 |
| C | 1.34785600  | -0.49856600 | -2.67969600 |
| H | 1.39386100  | -1.44635300 | -3.23415700 |
| H | 0.46148400  | 0.09080200  | -2.92547200 |
| C | 1.64763000  | 2.58185700  | -2.49378400 |
| H | 2.00795300  | 3.48326400  | -3.02040200 |
| H | 0.78448000  | 2.18565600  | -3.03873800 |
| H | 1.28714000  | 2.91935600  | -1.50736400 |
| C | 3.05628500  | -3.16896000 | -2.15047200 |
| H | 3.87512500  | -3.90323600 | -2.00107600 |
| H | 2.20175000  | -3.71890400 | -2.61993100 |
| H | 3.42297000  | -2.44062000 | -2.90998400 |
| O | 2.72477600  | -2.58019400 | -0.93299900 |

|             |             |             |             |
|-------------|-------------|-------------|-------------|
| H           | 2.37373300  | 0.30382400  | -0.02343400 |
| <b>TS4b</b> |             |             |             |
| C           | 3.12194500  | 1.85924700  | -1.60274300 |
| H           | 3.59669100  | 2.85020000  | -1.53685100 |
| C           | 4.01227800  | 0.76950800  | -1.32907200 |
| C           | 3.50293000  | -0.64877200 | -1.53701300 |
| H           | 3.65609000  | -0.95177200 | -2.59513400 |
| H           | 2.41822600  | -0.67926900 | -1.36076400 |
| C           | 5.49280400  | 0.97724100  | -1.62207100 |
| H           | 5.74261700  | 0.77882000  | -2.68725700 |
| H           | 5.80002500  | 2.01532900  | -1.40378500 |
| H           | 6.12911000  | 0.30606600  | -1.02109800 |
| C           | 1.74293300  | 1.84219200  | -1.76034800 |
| H           | 1.21547200  | 0.94097400  | -2.06218600 |
| H           | 1.18651000  | 2.77738000  | -1.84618900 |
| Pd          | 1.25942000  | 0.41312500  | 0.66445700  |
| C           | -1.63795300 | -1.44681500 | 0.99620300  |
| C           | -2.32316300 | -2.54496300 | 0.41880200  |
| C           | -1.40499000 | -1.48504400 | 2.39631400  |
| C           | -2.62152900 | -3.69276400 | 1.18141000  |
| C           | -1.70283000 | -2.62452300 | 3.16732100  |
| C           | -2.29555900 | -3.72754600 | 2.54281000  |
| H           | -3.13187500 | -4.53798000 | 0.72133200  |
| H           | -1.49097200 | -2.63888900 | 4.23533300  |
| H           | -2.53189800 | -4.61738300 | 3.12999600  |
| O           | -0.88278100 | -0.34174600 | 2.93509100  |
| O           | -2.70981200 | -2.42488500 | -0.88692300 |
| C           | -2.88933400 | -3.61551700 | -1.64982400 |
| H           | -2.91113500 | -3.29058200 | -2.69858500 |
| H           | -2.05189500 | -4.31584200 | -1.49039300 |



|   |             |             |             |
|---|-------------|-------------|-------------|
| H | -3.83864100 | -4.12194400 | -1.39610400 |
| C | -0.13614200 | -0.43244800 | 4.15017100  |
| H | 0.60348800  | -1.24813500 | 4.09544600  |
| H | 0.37999300  | 0.53056400  | 4.24699900  |
| H | -0.80375400 | -0.59294000 | 5.01521100  |
| P | -0.87151300 | -0.00596900 | 0.11953000  |
| C | -1.04451600 | -0.21395900 | -1.71548800 |
| C | -1.52005700 | 0.80551200  | -2.58549800 |
| C | -0.44043800 | -1.34611500 | -2.32611000 |
| C | -1.46042200 | 0.66073000  | -3.98745000 |
| C | -0.37065600 | -1.49393700 | -3.72326700 |
| C | -0.89288600 | -0.48786500 | -4.54314400 |
| H | -1.83971800 | 1.44566800  | -4.63837800 |
| H | 0.09076700  | -2.37340100 | -4.16737800 |
| H | -0.83964100 | -0.59331600 | -5.62837600 |
| C | -1.98140500 | 1.38552500  | 0.64179700  |
| C | -3.39392600 | 1.25241000  | 0.60185300  |
| C | -1.45080200 | 2.62596200  | 1.06075100  |
| C | -4.24285700 | 2.28958100  | 1.03453000  |
| C | -2.29157100 | 3.67991300  | 1.47442400  |
| C | -3.67777000 | 3.49561000  | 1.46815200  |
| H | -5.32468700 | 2.17034100  | 1.00942000  |
| H | -1.86037700 | 4.62209000  | 1.80995100  |
| H | -4.33043300 | 4.30552600  | 1.80104300  |
| O | 0.06121800  | -2.28715800 | -1.46647500 |
| O | -2.00690500 | 1.93706400  | -1.99675700 |
| O | -3.85350300 | 0.08838900  | 0.06337100  |
| O | -0.08766700 | 2.76979000  | 1.04413600  |
| C | 0.88555700  | -3.32402200 | -1.99796700 |
| H | 0.30595700  | -3.99614400 | -2.65529900 |

|   |             |             |             |
|---|-------------|-------------|-------------|
| H | 1.73606200  | -2.89918200 | -2.55696400 |
| H | 1.25093400  | -3.88036900 | -1.12622300 |
| C | -2.39581400 | 3.03767500  | -2.81060400 |
| H | -2.69805700 | 3.82175700  | -2.10447900 |
| H | -1.55438400 | 3.38898100  | -3.43378100 |
| H | -3.24703100 | 2.77483000  | -3.46435700 |
| C | -5.25195600 | -0.17191000 | 0.05877000  |
| H | -5.79310000 | 0.56418000  | -0.56301400 |
| H | -5.35370500 | -1.17515800 | -0.37235700 |
| H | -5.66510400 | -0.15468600 | 1.08295300  |
| C | 0.44978200  | 4.07061700  | 0.78508500  |
| H | -0.14345400 | 4.58912500  | 0.01335000  |
| H | 0.47324600  | 4.68290500  | 1.70369400  |
| H | 1.46685100  | 3.89221300  | 0.41994800  |
| C | 4.15254100  | -1.81005800 | -0.69183900 |
| H | 3.56560100  | -2.71312900 | -0.93680900 |
| H | 5.17126500  | -1.98670600 | -1.07591500 |
| C | 4.22575100  | -1.65982300 | 0.81509800  |
| C | 3.13433800  | -1.62211200 | 1.63679400  |
| H | 3.32853900  | -1.42813900 | 2.69743200  |
| C | 1.73898400  | -1.62942800 | 1.23471400  |
| H | 1.03276000  | -1.90954000 | 2.02193400  |
| H | 1.52208900  | -2.14719300 | 0.29803500  |
| C | 5.60067500  | -1.41632600 | 1.38845200  |
| H | 5.98245300  | -0.43758600 | 1.04399700  |
| H | 5.58870700  | -1.40271400 | 2.48987400  |
| H | 6.32867000  | -2.17707500 | 1.04949200  |
| C | 3.50241100  | 2.44948600  | 1.61855300  |
| H | 2.65516000  | 2.75150500  | 2.25511400  |
| H | 4.44251400  | 2.57678500  | 2.18904100  |

|              |             |             |             |
|--------------|-------------|-------------|-------------|
| H            | 3.53492000  | 3.10950200  | 0.73111900  |
| O            | 3.32550800  | 1.08910400  | 1.23954400  |
| H            | 3.75794900  | 0.97210300  | 0.20966200  |
| <b>Int4b</b> |             |             |             |
| C            | 0.51562900  | -1.90084400 | -2.45286600 |
| H            | 1.27006500  | -1.29281800 | -2.96274100 |
| C            | 0.99338900  | -2.77324500 | -1.41784800 |
| C            | 0.20862400  | -3.97805300 | -0.92699300 |
| H            | 0.78773100  | -4.88617700 | -1.18187600 |
| H            | -0.75693700 | -4.04360400 | -1.45317100 |
| C            | 2.49379700  | -2.90726800 | -1.25319300 |
| H            | 2.85002700  | -3.83603400 | -1.74200700 |
| H            | 3.03389000  | -2.06559800 | -1.70493500 |
| H            | 2.77450500  | -2.97732000 | -0.19478100 |
| C            | -0.82669800 | -1.59568600 | -2.71050400 |
| H            | -1.63656400 | -2.26848400 | -2.42840500 |
| H            | -1.07249700 | -0.82583500 | -3.44047300 |
| Pd           | -0.16248200 | -0.98680900 | -0.53548100 |
| C            | -2.77263200 | 0.23872800  | 1.69992000  |
| C            | -4.00596600 | -0.29125500 | 2.16786600  |
| C            | -1.88880400 | 0.76683900  | 2.68210000  |
| C            | -4.25340500 | -0.46075000 | 3.54603600  |
| C            | -2.12869600 | 0.59985500  | 4.06224500  |
| C            | -3.30138000 | -0.03547900 | 4.47795000  |
| H            | -5.19352800 | -0.88933300 | 3.88912800  |
| H            | -1.41674100 | 0.96360300  | 4.79922800  |
| H            | -3.49040400 | -0.17436700 | 5.54443900  |
| O            | -0.82250900 | 1.46674700  | 2.19757300  |
| O            | -4.96194600 | -0.57768600 | 1.23285300  |
| C            | -6.07205700 | -1.38418100 | 1.60616000  |

|   |             |             |             |
|---|-------------|-------------|-------------|
| H | -6.57146600 | -1.64474400 | 0.66372400  |
| H | -5.74596100 | -2.30245900 | 2.12524300  |
| H | -6.77073400 | -0.83353100 | 2.26304500  |
| C | 0.11835200  | 1.99715400  | 3.13537100  |
| H | 0.61409400  | 1.18216600  | 3.69019800  |
| H | 0.85351600  | 2.54289000  | 2.53829700  |
| H | -0.38264000 | 2.67941900  | 3.84427300  |
| P | -2.12777000 | 0.27043600  | -0.05359000 |
| C | -3.39646400 | -0.56321600 | -1.12870800 |
| C | -3.93660400 | 0.00091900  | -2.30914700 |
| C | -3.71857500 | -1.91862100 | -0.85535200 |
| C | -4.84260900 | -0.71556600 | -3.12031600 |
| C | -4.60861200 | -2.64855900 | -1.66415700 |
| C | -5.17660800 | -2.02992500 | -2.78588900 |
| H | -5.26127900 | -0.25701100 | -4.01446000 |
| H | -4.85157000 | -3.68367400 | -1.43229500 |
| H | -5.86927500 | -2.58956600 | -3.41759400 |
| C | -2.23097900 | 2.09156500  | -0.39868200 |
| C | -3.37208100 | 2.85976100  | -0.03622000 |
| C | -1.13339400 | 2.77968400  | -0.94651500 |
| C | -3.36891900 | 4.26328900  | -0.13326300 |
| C | -1.12594800 | 4.18345200  | -1.06539200 |
| C | -2.23621700 | 4.91770900  | -0.64223500 |
| H | -4.24350800 | 4.84013600  | 0.16470200  |
| H | -0.24592000 | 4.67040700  | -1.48699500 |
| H | -2.23326900 | 6.00726800  | -0.71675300 |
| O | -3.10919800 | -2.45530100 | 0.24631400  |
| O | -3.50013600 | 1.25472400  | -2.64625200 |
| O | -4.46278500 | 2.14113900  | 0.35501500  |
| O | -0.02116900 | 2.08418800  | -1.37628700 |

|   |             |             |             |
|---|-------------|-------------|-------------|
| C | -3.47721200 | -3.77027500 | 0.65653500  |
| H | -4.56591000 | -3.84052900 | 0.82271000  |
| H | -3.17110400 | -4.52000900 | -0.09335700 |
| H | -2.93785900 | -3.94665600 | 1.59368400  |
| C | -4.23554600 | 2.01207200  | -3.60221000 |
| H | -3.80435100 | 3.02089200  | -3.56522100 |
| H | -4.12653900 | 1.59547300  | -4.61992700 |
| H | -5.30697600 | 2.04865200  | -3.33809500 |
| C | -5.54815300 | 2.81832500  | 0.97865300  |
| H | -6.07023800 | 3.48325700  | 0.26642600  |
| H | -6.22637000 | 2.02472200  | 1.31493700  |
| H | -5.20182400 | 3.41262800  | 1.84233500  |
| C | 0.01992900  | 1.94405900  | -2.80920900 |
| H | 0.02709400  | 2.93738800  | -3.29510200 |
| H | 0.95360900  | 1.41456700  | -3.02350800 |
| H | -0.85527100 | 1.37252200  | -3.15653100 |
| C | -0.09632800 | -4.03021400 | 0.62234300  |
| H | -0.89889200 | -3.30807000 | 0.80542800  |
| H | -0.47898600 | -5.04326300 | 0.84254900  |
| C | 1.09699100  | -3.69817000 | 1.47383800  |
| C | 1.36673600  | -2.40162800 | 1.79030400  |
| H | 2.34670200  | -2.20624400 | 2.24002300  |
| C | 0.49100200  | -1.24157400 | 1.51609900  |
| H | 0.93915100  | -0.29815600 | 1.85051000  |
| H | -0.50228300 | -1.35391500 | 1.97984300  |
| C | 2.05961100  | -4.82346700 | 1.76470100  |
| H | 2.35066300  | -5.33844000 | 0.82671600  |
| H | 2.97656100  | -4.45614400 | 2.24668900  |
| H | 1.59956900  | -5.59660700 | 2.41017900  |
| C | 3.76625600  | 0.01927100  | -2.96666100 |

|   |            |             |             |
|---|------------|-------------|-------------|
| H | 4.34398000 | 0.82972800  | -3.43191500 |
| H | 4.48134200 | -0.66805900 | -2.47967300 |
| H | 3.21663800 | -0.53191200 | -3.75438800 |
| O | 2.88938100 | 0.64233600  | -2.02880900 |
| H | 2.27959200 | -0.02402200 | -1.65205500 |
| C | 6.75564700 | -0.67798100 | -0.32983400 |
| C | 5.69306700 | 0.23907100  | -0.17026500 |
| C | 5.76852600 | 1.49266600  | -0.77980400 |
| C | 6.91737500 | 1.81786600  | -1.53083200 |
| C | 7.96592200 | 0.89437400  | -1.67502900 |
| C | 7.89911600 | -0.37850600 | -1.07585200 |
| C | 5.21476200 | -1.79673700 | 1.00636800  |
| H | 4.94476800 | 2.19704700  | -0.68790100 |
| H | 6.98906300 | 2.79736000  | -2.00754100 |
| H | 8.84752400 | 1.16015500  | -2.26237600 |
| H | 8.70902000 | -1.10162000 | -1.19130100 |
| N | 6.44058300 | -1.86512000 | 0.35137200  |
| H | 7.05958500 | -2.66141400 | 0.45789600  |
| O | 4.76025300 | -2.66859600 | 1.73804200  |
| C | 4.60664800 | -0.41760800 | 0.65626100  |
| H | 3.70773300 | -0.57892200 | 0.04169700  |
| C | 4.16309900 | 0.32866500  | 1.94806100  |
| H | 4.99478200 | 0.32148700  | 2.67047300  |
| H | 3.33770900 | -0.25288600 | 2.38643200  |
| C | 3.74480400 | 1.75530600  | 1.66203600  |
| C | 2.64552500 | 2.03412500  | 0.82623900  |
| C | 4.50686300 | 2.82796600  | 2.16149600  |
| C | 2.32975300 | 3.35838000  | 0.48718100  |
| H | 2.03215000 | 1.22382200  | 0.43049000  |
| C | 4.18478000 | 4.15521900  | 1.83761500  |

|             |             |             |             |
|-------------|-------------|-------------|-------------|
| H           | 5.36986100  | 2.61469600  | 2.79744400  |
| C           | 3.09624200  | 4.42240200  | 0.99230500  |
| H           | 1.48291700  | 3.54270900  | -0.17097600 |
| H           | 4.78851400  | 4.97443900  | 2.23525900  |
| H           | 2.84672200  | 5.45259700  | 0.72690000  |
| <b>TS5b</b> |             |             |             |
| C           | 0.84067300  | -0.81083200 | -2.91723700 |
| H           | 1.24522600  | -0.01738300 | -3.56145900 |
| C           | 1.82347200  | -1.65843200 | -2.32462100 |
| C           | 1.36882400  | -2.95288000 | -1.63045100 |
| H           | 2.24711300  | -3.60999400 | -1.51412400 |
| H           | 0.67638600  | -3.48713700 | -2.31011400 |
| C           | 3.17587400  | -1.77643400 | -3.03052500 |
| H           | 3.17865500  | -2.58153500 | -3.79419100 |
| H           | 3.44251800  | -0.83528600 | -3.54044000 |
| H           | 3.98387100  | -2.00349500 | -2.31658700 |
| C           | -0.51812100 | -0.71009300 | -2.58675900 |
| H           | -1.04056200 | -1.58766300 | -2.20269900 |
| H           | -1.14277800 | 0.00590400  | -3.12169200 |
| Pd          | -0.14833800 | 0.13719700  | -0.28382200 |
| C           | -2.90308900 | 0.64637800  | 1.76023500  |
| C           | -3.80564900 | -0.05502100 | 2.59940600  |
| C           | -2.21792200 | 1.75534200  | 2.32264800  |
| C           | -3.91006300 | 0.26343200  | 3.96983800  |
| C           | -2.31322800 | 2.07940600  | 3.68797900  |
| C           | -3.15431900 | 1.31432500  | 4.50329000  |
| H           | -4.59614900 | -0.29078100 | 4.60889800  |
| H           | -1.75752800 | 2.92277400  | 4.09549000  |
| H           | -3.24240400 | 1.55465800  | 5.56485600  |
| O           | -1.47713000 | 2.48488900  | 1.43737200  |

|   |             |             |             |
|---|-------------|-------------|-------------|
| O | -4.57449700 | -1.03107500 | 2.02841600  |
| C | -5.06181500 | -2.07932600 | 2.86210300  |
| H | -5.38042800 | -2.87505100 | 2.17543100  |
| H | -4.26791500 | -2.45545100 | 3.52930000  |
| H | -5.92049400 | -1.74658400 | 3.47374100  |
| C | -0.37091100 | 3.24468000  | 1.91875700  |
| H | 0.23728400  | 2.65112700  | 2.62049000  |
| H | 0.21948100  | 3.48520500  | 1.02717300  |
| H | -0.71014100 | 4.17222500  | 2.41420100  |
| P | -2.36183000 | 0.22010000  | 0.03559800  |
| C | -3.06506400 | -1.43120400 | -0.43203300 |
| C | -3.68530300 | -1.70741300 | -1.67853000 |
| C | -2.75435300 | -2.54392700 | 0.39599300  |
| C | -4.04630000 | -3.02239600 | -2.04159100 |
| C | -3.11658900 | -3.85750800 | 0.04409800  |
| C | -3.76754000 | -4.08203500 | -1.17358800 |
| H | -4.53040400 | -3.21756900 | -2.99630300 |
| H | -2.87883200 | -4.69120400 | 0.70182500  |
| H | -4.04532800 | -5.09891400 | -1.45815700 |
| C | -3.22187800 | 1.54332700  | -0.94049800 |
| C | -4.63809100 | 1.63935400  | -0.89297500 |
| C | -2.52661400 | 2.47424300  | -1.75020700 |
| C | -5.34279200 | 2.59813600  | -1.64367200 |
| C | -3.22755300 | 3.43099500  | -2.51827400 |
| C | -4.62254100 | 3.48172600  | -2.45717700 |
| H | -6.42938100 | 2.65024000  | -1.60385800 |
| H | -2.68399900 | 4.14227700  | -3.13749900 |
| H | -5.15908900 | 4.22876200  | -3.04621100 |
| O | -2.07947100 | -2.25155200 | 1.54538200  |
| O | -3.89100500 | -0.64133000 | -2.50833800 |



|   |             |             |             |
|---|-------------|-------------|-------------|
| O | -5.24760700 | 0.71395000  | -0.10248500 |
| O | -1.16054500 | 2.42534900  | -1.74827900 |
| C | -1.57702000 | -3.31424500 | 2.35318500  |
| H | -2.40541100 | -3.87962400 | 2.81717700  |
| H | -0.94775000 | -3.99464700 | 1.75967000  |
| H | -0.96512000 | -2.82776500 | 3.12045600  |
| C | -4.35790000 | -0.87233200 | -3.83280800 |
| H | -4.38396000 | 0.11806300  | -4.30472400 |
| H | -3.67157100 | -1.53907600 | -4.38369100 |
| H | -5.37203000 | -1.31168000 | -3.83268200 |
| C | -6.66722600 | 0.67781400  | -0.03931600 |
| H | -7.10386300 | 0.48274600  | -1.03542300 |
| H | -6.90042500 | -0.14585300 | 0.64557700  |
| H | -7.07521500 | 1.62545300  | 0.35583100  |
| C | -0.45638000 | 2.97911800  | -2.85958800 |
| H | -0.89512700 | 2.63885900  | -3.81327400 |
| H | -0.46054900 | 4.08350400  | -2.82942600 |
| H | 0.56959600  | 2.60706100  | -2.76379400 |
| C | 0.63100600  | -2.89933200 | -0.24423100 |
| H | -0.22657100 | -2.21916200 | -0.30740300 |
| H | 0.22249900  | -3.91844500 | -0.10051300 |
| C | 1.47791800  | -2.56089500 | 0.96370900  |
| C | 1.35927200  | -1.45349100 | 1.74330800  |
| H | 2.12590900  | -1.35041800 | 2.52441000  |
| C | 0.37039700  | -0.32465000 | 1.71396300  |
| H | 0.81222500  | 0.57661200  | 2.16979400  |
| H | -0.56701600 | -0.55858500 | 2.23361000  |
| C | 2.53157200  | -3.60443100 | 1.28392000  |
| H | 3.26561400  | -3.69675300 | 0.46320700  |
| H | 3.07381400  | -3.36895300 | 2.21023800  |

|   |            |             |             |
|---|------------|-------------|-------------|
| H | 2.06325700 | -4.60206500 | 1.39232400  |
| C | 2.48145600 | 1.42527500  | -1.18980800 |
| H | 1.83346800 | 2.26669700  | -0.90226700 |
| H | 3.51480900 | 1.67570500  | -0.90758200 |
| H | 2.42558100 | 1.28599200  | -2.28609500 |
| O | 2.04697200 | 0.24563600  | -0.51215100 |
| H | 2.09162700 | -0.63601500 | -1.27388900 |
| C | 5.99196800 | -1.84180100 | -0.05673300 |
| C | 5.57162100 | -0.49347900 | -0.14435400 |
| C | 5.85629700 | 0.22963600  | -1.30327400 |
| C | 6.54688300 | -0.39889000 | -2.36062700 |
| C | 6.93865900 | -1.74241100 | -2.25847300 |
| C | 6.66582300 | -2.48873500 | -1.09594000 |
| C | 4.98033200 | -1.41493700 | 1.98820100  |
| H | 5.54974200 | 1.27056300  | -1.39286600 |
| H | 6.76751200 | 0.16295600  | -3.26999400 |
| H | 7.46093200 | -2.22140800 | -3.08905000 |
| H | 6.97278300 | -3.53290200 | -1.00980400 |
| N | 5.63343000 | -2.35241200 | 1.19886300  |
| H | 5.80513400 | -3.29936400 | 1.51717600  |
| O | 4.60613200 | -1.59319600 | 3.14266600  |
| C | 4.83528000 | -0.13791600 | 1.13141100  |
| H | 3.75642200 | -0.02126600 | 0.91705300  |
| C | 5.33486000 | 1.09560300  | 1.93370300  |
| H | 6.43372800 | 1.05394900  | 2.00447900  |
| H | 4.92872000 | 0.98909600  | 2.95235500  |
| C | 4.89582600 | 2.41519900  | 1.33790000  |
| C | 3.60752500 | 2.91884700  | 1.60492700  |
| C | 5.74518400 | 3.14989700  | 0.48911100  |
| C | 3.17918200 | 4.12616800  | 1.03532900  |

|   |            |            |             |
|---|------------|------------|-------------|
| H | 2.93650300 | 2.34790400 | 2.25092200  |
| C | 5.31427800 | 4.35082600 | -0.09713600 |
| H | 6.74773500 | 2.76836300 | 0.28286400  |
| C | 4.02815600 | 4.84346000 | 0.17599200  |
| H | 2.18348300 | 4.51174200 | 1.26199900  |
| H | 5.98514700 | 4.90509000 | -0.75746700 |
| H | 3.69299600 | 5.78260400 | -0.26958900 |

**Int5b**

|    |             |             |             |
|----|-------------|-------------|-------------|
| C  | -0.11809700 | -2.96151400 | -2.11729900 |
| H  | 0.03482900  | -1.97786200 | -2.57171400 |
| C  | 1.15807700  | -3.61478000 | -1.62937000 |
| C  | 0.93591500  | -4.77028900 | -0.63542800 |
| H  | 1.87689600  | -5.33432200 | -0.52807600 |
| H  | 0.19404200  | -5.48380500 | -1.03485300 |
| C  | 1.98380800  | -4.08852200 | -2.84993000 |
| H  | 1.46670700  | -4.91133100 | -3.37343400 |
| H  | 2.13675100  | -3.26719400 | -3.56924500 |
| H  | 2.97533500  | -4.44748600 | -2.52576300 |
| C  | -1.36276000 | -3.46611400 | -2.10058400 |
| H  | -1.58857000 | -4.43887700 | -1.65639300 |
| H  | -2.20942000 | -2.91138500 | -2.50679900 |
| Pd | 0.05422600  | -0.30583400 | -0.20195800 |
| C  | -2.69856300 | 0.70055800  | 1.77416800  |
| C  | -3.92880400 | 0.30121000  | 2.35891400  |
| C  | -1.76508300 | 1.37237300  | 2.61058200  |
| C  | -4.14500800 | 0.41326200  | 3.74671600  |
| C  | -1.97441200 | 1.48670500  | 4.00021800  |
| C  | -3.15694500 | 0.98768500  | 4.55474900  |
| H  | -5.08523500 | 0.08256400  | 4.18548500  |
| H  | -1.23526400 | 1.97203700  | 4.63389500  |

|   |             |             |             |
|---|-------------|-------------|-------------|
| H | -3.32422100 | 1.07363400  | 5.63039700  |
| O | -0.68205600 | 1.90847200  | 1.97844600  |
| O | -4.89834600 | -0.15683800 | 1.51233100  |
| C | -5.92867600 | -0.98648100 | 2.04294900  |
| H | -6.41795100 | -1.43912200 | 1.17084900  |
| H | -5.50736600 | -1.77578500 | 2.68905900  |
| H | -6.66284400 | -0.39869800 | 2.62361300  |
| C | 0.43764900  | 2.32397400  | 2.77091900  |
| H | 0.79610000  | 1.49113800  | 3.39942100  |
| H | 1.20882000  | 2.61845300  | 2.05324600  |
| H | 0.16731900  | 3.18216400  | 3.41010300  |
| P | -2.12245900 | 0.30892200  | 0.06129700  |
| C | -3.33169100 | -0.87263100 | -0.71087500 |
| C | -3.97281800 | -0.68062700 | -1.96239600 |
| C | -3.54373400 | -2.12032000 | -0.06521300 |
| C | -4.80823500 | -1.67234800 | -2.52016900 |
| C | -4.38646500 | -3.10811500 | -0.60494100 |
| C | -5.01237700 | -2.87233100 | -1.83305500 |
| H | -5.29334500 | -1.50948600 | -3.48038100 |
| H | -4.53896800 | -4.05225100 | -0.08642400 |
| H | -5.65776100 | -3.63851500 | -2.26670300 |
| C | -2.24636600 | 1.92164200  | -0.84440400 |
| C | -3.26908700 | 2.88251800  | -0.61972000 |
| C | -1.25246700 | 2.24076100  | -1.78461300 |
| C | -3.23396800 | 4.13693300  | -1.26013600 |
| C | -1.21672600 | 3.47591100  | -2.45083800 |
| C | -2.20538700 | 4.42453100  | -2.16956900 |
| H | -4.00838500 | 4.87759600  | -1.06641700 |
| H | -0.41452300 | 3.67760300  | -3.16095600 |
| H | -2.18186700 | 5.39836100  | -2.66245500 |

|   |             |             |             |
|---|-------------|-------------|-------------|
| O | -2.90459300 | -2.27401400 | 1.13158300  |
| O | -3.72809600 | 0.50380300  | -2.60449600 |
| O | -4.27926700 | 2.48761700  | 0.20257300  |
| O | -0.24673800 | 1.31375500  | -2.07171700 |
| C | -2.98531700 | -3.52985500 | 1.80548000  |
| H | -4.02268400 | -3.74252600 | 2.11843100  |
| H | -2.61576800 | -4.34525800 | 1.16257800  |
| H | -2.33843300 | -3.42816000 | 2.68492900  |
| C | -4.39786600 | 0.78719400  | -3.82916600 |
| H | -4.06853200 | 1.79591100  | -4.10894300 |
| H | -4.11685300 | 0.06617200  | -4.61762500 |
| H | -5.49409500 | 0.77039100  | -3.69735100 |
| C | -5.25134100 | 3.44481200  | 0.61279400  |
| H | -5.85349200 | 3.79610200  | -0.24458100 |
| H | -5.89234100 | 2.91562300  | 1.32850200  |
| H | -4.77351800 | 4.31200100  | 1.10131400  |
| C | -0.41690600 | 0.66284000  | -3.35377500 |
| H | -0.49533800 | 1.41836100  | -4.15319700 |
| H | 0.48123700  | 0.05304400  | -3.49404400 |
| H | -1.31959300 | 0.03497700  | -3.33698400 |
| C | 0.47928100  | -4.26672700 | 0.75807100  |
| H | -0.43994100 | -3.68231400 | 0.62318300  |
| H | 0.23746100  | -5.14835900 | 1.38449900  |
| C | 1.54612900  | -3.44043900 | 1.44789600  |
| C | 1.38580400  | -2.13373300 | 1.79578400  |
| H | 2.25317000  | -1.62287200 | 2.21936200  |
| C | 0.16800900  | -1.33781700 | 1.64492800  |
| H | 0.12304700  | -0.49266300 | 2.34473000  |
| H | -0.76132600 | -1.90914600 | 1.66623300  |
| C | 2.86728900  | -4.13308400 | 1.69493400  |

|   |            |             |             |
|---|------------|-------------|-------------|
| H | 3.39702400 | -4.32081900 | 0.74213400  |
| H | 3.52356700 | -3.52510100 | 2.33337500  |
| H | 2.71558100 | -5.12239300 | 2.16662700  |
| C | 2.53341800 | -0.39515400 | -1.86628800 |
| H | 2.28289600 | 0.64261400  | -2.18524100 |
| H | 3.63865500 | -0.48306900 | -1.90903300 |
| H | 2.12615300 | -1.09062200 | -2.63975200 |
| O | 2.08727600 | -0.70443700 | -0.57619800 |
| H | 1.73092700 | -2.82539100 | -1.11373900 |
| C | 6.59688100 | -0.71576600 | 0.16660400  |
| C | 5.65176000 | 0.31014100  | -0.06726800 |
| C | 5.83493300 | 1.17777400  | -1.14567000 |
| C | 6.96266200 | 1.01115200  | -1.97687400 |
| C | 7.88691000 | -0.01782200 | -1.73128400 |
| C | 7.71600100 | -0.90365700 | -0.64933500 |
| C | 5.05330500 | -0.92112800 | 1.89132900  |
| H | 5.11145900 | 1.96945000  | -1.33883000 |
| H | 7.11565100 | 1.68659600  | -2.82094800 |
| H | 8.75295600 | -0.13799000 | -2.38588200 |
| H | 8.43360500 | -1.70379900 | -0.45579700 |
| N | 6.20485700 | -1.43967800 | 1.30379000  |
| H | 6.73266700 | -2.19408200 | 1.72888200  |
| O | 4.56207000 | -1.31551000 | 2.94699800  |
| C | 4.55881900 | 0.20478100  | 0.97066100  |
| H | 3.61294800 | -0.15832900 | 0.49839100  |
| C | 4.24290800 | 1.48838200  | 1.77822100  |
| H | 5.14448100 | 1.80977600  | 2.32566400  |
| H | 3.48995700 | 1.20728100  | 2.53428400  |
| C | 3.73563600 | 2.63184600  | 0.91958500  |
| C | 2.64936700 | 2.44192700  | 0.03965500  |

|   |            |            |             |
|---|------------|------------|-------------|
| C | 4.34203900 | 3.90026700 | 0.98142200  |
| C | 2.17619500 | 3.50166400 | -0.74742800 |
| H | 2.18802400 | 1.45489500 | -0.03174500 |
| C | 3.87148800 | 4.96315100 | 0.19223300  |
| H | 5.19398300 | 4.05173400 | 1.64968900  |
| C | 2.78438800 | 4.76675000 | -0.67428600 |
| H | 1.33150600 | 3.32913700 | -1.41430700 |
| H | 4.35691000 | 5.94032000 | 0.25248900  |
| H | 2.41601000 | 5.59161100 | -1.28923300 |

**TS6b**

|    |             |             |             |
|----|-------------|-------------|-------------|
| C  | -0.04361600 | 3.45353300  | 1.17704600  |
| H  | -0.67823700 | 2.85990000  | 0.51518100  |
| C  | 1.19118200  | 4.02696600  | 0.52135500  |
| C  | 0.78385500  | 4.80038500  | -0.76477900 |
| H  | 1.63114300  | 5.42619200  | -1.08844700 |
| H  | -0.04910700 | 5.48762700  | -0.53308600 |
| C  | 2.03299400  | 4.90901800  | 1.45631300  |
| H  | 1.46011600  | 5.79096100  | 1.79051400  |
| H  | 2.34984000  | 4.34885400  | 2.35070300  |
| H  | 2.93650500  | 5.26131500  | 0.93390600  |
| C  | -0.44355900 | 3.61201300  | 2.45103700  |
| H  | 0.13252700  | 4.19752300  | 3.17288900  |
| H  | -1.37750800 | 3.16431900  | 2.79769600  |
| Pd | 0.20544000  | 0.42185400  | -0.10902700 |
| C  | -2.82944100 | -0.88997300 | -1.44541600 |
| C  | -4.13867100 | -0.51208400 | -1.84139000 |
| C  | -2.09095200 | -1.72643700 | -2.32614500 |
| C  | -4.62096700 | -0.81521500 | -3.13141100 |
| C  | -2.56774100 | -2.03542100 | -3.61541100 |
| C  | -3.82308100 | -1.55748300 | -4.00867500 |

|   |             |             |             |
|---|-------------|-------------|-------------|
| H | -5.61925600 | -0.50382900 | -3.43373100 |
| H | -1.97863300 | -2.64829400 | -4.29393800 |
| H | -4.19737700 | -1.79158000 | -5.00732600 |
| O | -0.93138600 | -2.22407100 | -1.81746600 |
| O | -4.90688500 | 0.11844100  | -0.90625700 |
| C | -6.07687000 | 0.81360700  | -1.32913900 |
| H | -6.40323400 | 1.39198800  | -0.45549800 |
| H | -5.85276900 | 1.49406500  | -2.16934500 |
| H | -6.87291100 | 0.11169100  | -1.63549600 |
| C | -0.07650500 | -2.98637200 | -2.67971300 |
| H | 0.24375200  | -2.37719600 | -3.54254000 |
| H | 0.78241100  | -3.26469900 | -2.06788300 |
| H | -0.59864900 | -3.88918300 | -3.04031200 |
| P | -1.95200500 | -0.28341800 | 0.05055100  |
| C | -2.98313700 | 1.05507200  | 0.82067600  |
| C | -3.55607200 | 1.02692700  | 2.11967300  |
| C | -3.16384100 | 2.24232100  | 0.06219500  |
| C | -4.17946100 | 2.17057300  | 2.66612400  |
| C | -3.80316900 | 3.37704300  | 0.58904200  |
| C | -4.29013600 | 3.33390900  | 1.90014600  |
| H | -4.60014100 | 2.14004600  | 3.66932700  |
| H | -3.90857900 | 4.28278300  | -0.00410200 |
| H | -4.77282800 | 4.21583000  | 2.32516200  |
| C | -1.78640900 | -1.66108200 | 1.27709700  |
| C | -2.32990500 | -2.95936600 | 1.14582000  |
| C | -0.97811900 | -1.39587700 | 2.41317000  |
| C | -2.04724500 | -3.96043500 | 2.10293400  |
| C | -0.72827900 | -2.36848100 | 3.39262000  |
| C | -1.26359400 | -3.65449500 | 3.21720500  |
| H | -2.46536300 | -4.95878100 | 1.98489700  |



|   |             |             |             |
|---|-------------|-------------|-------------|
| H | -0.10285600 | -2.14646800 | 4.25462900  |
| H | -1.05559000 | -4.42740100 | 3.95930400  |
| O | -2.68972300 | 2.19228100  | -1.22207600 |
| O | -3.51557400 | -0.16003000 | 2.78882100  |
| O | -3.16151200 | -3.18399500 | 0.08948900  |
| O | -0.47478800 | -0.11880100 | 2.48077600  |
| C | -3.04169200 | 3.24508200  | -2.12183100 |
| H | -4.13822100 | 3.35608100  | -2.17741200 |
| H | -2.58723400 | 4.20165000  | -1.81535200 |
| H | -2.63845100 | 2.94207100  | -3.09531700 |
| C | -3.83672100 | -0.18961300 | 4.17680400  |
| H | -3.57603200 | -1.20185800 | 4.51038900  |
| H | -3.24683200 | 0.55708400  | 4.73739900  |
| H | -4.91214000 | -0.00154300 | 4.34488800  |
| C | -3.27619900 | -4.51725800 | -0.41049300 |
| H | -3.90495600 | -5.14371000 | 0.24724100  |
| H | -3.75448000 | -4.41800300 | -1.39368100 |
| H | -2.28033200 | -4.97950600 | -0.51850200 |
| C | 0.18705700  | 0.30078600  | 3.67975700  |
| H | 1.12538400  | -0.25732800 | 3.82692300  |
| H | 0.39584500  | 1.36484900  | 3.52801100  |
| H | -0.47804700 | 0.15383000  | 4.54752500  |
| C | 0.37019800  | 3.86645000  | -1.93146400 |
| H | -0.48438000 | 3.25784900  | -1.61648100 |
| H | 0.03609400  | 4.50502400  | -2.77285400 |
| C | 1.49817300  | 2.97385600  | -2.40371400 |
| C | 1.39621900  | 1.61330200  | -2.48974900 |
| H | 2.30492700  | 1.07029600  | -2.76092700 |
| C | 0.21456900  | 0.81175800  | -2.18904900 |
| H | 0.24834400  | -0.20215000 | -2.60315100 |

|   |             |             |             |
|---|-------------|-------------|-------------|
| H | -0.75810700 | 1.28602400  | -2.35177000 |
| C | 2.80026700  | 3.65953100  | -2.73566900 |
| H | 3.25475100  | 4.07582600  | -1.81717400 |
| H | 3.52434300  | 2.96047500  | -3.17385000 |
| H | 2.63336100  | 4.51670600  | -3.41499900 |
| C | 2.71220500  | 0.98801500  | 1.54851600  |
| H | 2.61931600  | 0.02135400  | 2.07876700  |
| H | 3.76228700  | 1.31178300  | 1.61574000  |
| H | 2.06347200  | 1.73506800  | 2.03340300  |
| O | 2.32615800  | 0.88012300  | 0.17598100  |
| H | 1.80922700  | 3.17250600  | 0.19360300  |
| C | 5.95680300  | 0.54391900  | 0.32431400  |
| C | 5.13911500  | -0.62899600 | 0.27179800  |
| C | 5.20935100  | -1.54362500 | 1.33470100  |
| C | 6.06004200  | -1.27555800 | 2.42601400  |
| C | 6.83413400  | -0.10188600 | 2.46938100  |
| C | 6.79018200  | 0.82762900  | 1.40930900  |
| C | 4.85629900  | 0.58400600  | -1.71439900 |
| H | 4.60748600  | -2.45313500 | 1.31283000  |
| H | 6.11942700  | -1.99163600 | 3.24960500  |
| H | 7.48484200  | 0.09196200  | 3.32531900  |
| H | 7.40054200  | 1.73422200  | 1.43021100  |
| N | 5.72738500  | 1.27566900  | -0.83937200 |
| H | 6.27469900  | 2.06971100  | -1.15019300 |
| O | 4.63461200  | 0.93453200  | -2.88706800 |
| C | 4.30020700  | -0.53410300 | -0.93186200 |
| H | 3.13626600  | 0.22043000  | -0.36905000 |
| C | 3.84099900  | -1.74013400 | -1.73832100 |
| H | 4.71016400  | -2.22475900 | -2.22398400 |
| H | 3.22285900  | -1.35793600 | -2.57211300 |

|   |            |             |             |
|---|------------|-------------|-------------|
| C | 3.05546500 | -2.81596800 | -1.00828400 |
| C | 2.16009400 | -2.52145000 | 0.03902000  |
| C | 3.15883600 | -4.15726300 | -1.43408800 |
| C | 1.36437200 | -3.52478500 | 0.61198100  |
| H | 2.08279800 | -1.49628300 | 0.39452300  |
| C | 2.36968700 | -5.16750300 | -0.86141900 |
| H | 3.86256800 | -4.40319900 | -2.23404100 |
| C | 1.45951800 | -4.85082100 | 0.16077300  |
| H | 0.66492500 | -3.26903200 | 1.40466700  |
| H | 2.46725200 | -6.19787100 | -1.21290400 |
| H | 0.83706300 | -5.62814500 | 0.61079900  |

**Int6b**

|    |            |             |             |
|----|------------|-------------|-------------|
| C  | 1.54645000 | 6.66363900  | -1.14215900 |
| H  | 1.88483600 | 6.79834400  | -2.17723600 |
| C  | 2.39259700 | 4.32210100  | -1.06276500 |
| H  | 3.20389300 | 4.61906900  | -0.37529700 |
| H  | 2.76001400 | 4.50803800  | -2.08733800 |
| Pd | 0.07201200 | 0.35633900  | -1.17782300 |
| C  | 3.01068900 | -1.70386500 | -0.91188700 |
| C  | 4.03503400 | -2.40876200 | -0.22818000 |
| C  | 2.96976700 | -1.80303900 | -2.32468800 |
| C  | 4.99935800 | -3.16611600 | -0.91941600 |
| C  | 3.93445100 | -2.55907700 | -3.02661600 |
| C  | 4.93577500 | -3.22826600 | -2.31672700 |
| H  | 5.78312600 | -3.69729200 | -0.38227900 |
| H  | 3.90271400 | -2.62858700 | -4.11199800 |
| H  | 5.67900000 | -3.81312900 | -2.86254400 |
| O  | 1.95726200 | -1.14435400 | -2.96297500 |
| O  | 4.01599300 | -2.28454400 | 1.12896200  |
| C  | 4.89961300 | -3.08240000 | 1.90840500  |

|   |             |             |             |
|---|-------------|-------------|-------------|
| H | 4.63830000  | -2.86537100 | 2.95095000  |
| H | 4.75661900  | -4.15662400 | 1.69714800  |
| H | 5.95491500  | -2.81327700 | 1.72100700  |
| C | 1.77598900  | -1.34321400 | -4.36127000 |
| H | 1.65791400  | -2.41492800 | -4.59742900 |
| H | 0.85681200  | -0.80047700 | -4.61307900 |
| H | 2.62236400  | -0.93238300 | -4.93972900 |
| P | 1.67677300  | -0.84273500 | 0.04485300  |
| C | 0.95382000  | -2.29349900 | 0.93983500  |
| C | 1.07541000  | -2.65320600 | 2.30645900  |
| C | 0.19067900  | -3.14638700 | 0.09546200  |
| C | 0.39998600  | -3.78166600 | 2.81531000  |
| C | -0.48304800 | -4.27486100 | 0.59753300  |
| C | -0.37916200 | -4.56966200 | 1.95858200  |
| H | 0.48358300  | -4.05199000 | 3.86609500  |
| H | -1.10492300 | -4.88055800 | -0.05566300 |
| H | -0.90888500 | -5.43486900 | 2.36201500  |
| C | 2.45111500  | 0.31291300  | 1.25980800  |
| C | 3.75630300  | 0.85483800  | 1.15533600  |
| C | 1.61882100  | 0.82419600  | 2.28669100  |
| C | 4.23704800  | 1.78359600  | 2.10121800  |
| C | 2.08451200  | 1.75063200  | 3.23530500  |
| C | 3.40176800  | 2.21380800  | 3.13791800  |
| H | 5.24627400  | 2.18236700  | 2.01860700  |
| H | 1.42552000  | 2.11331400  | 4.02235900  |
| H | 3.77514100  | 2.93840500  | 3.86404400  |
| O | 0.20453600  | -2.80821300 | -1.22267900 |
| O | 1.88706000  | -1.87493600 | 3.09107400  |
| O | 4.49324900  | 0.46723700  | 0.07011800  |
| O | 0.32705000  | 0.36642200  | 2.27623500  |

|   |             |             |             |
|---|-------------|-------------|-------------|
| C | -0.45071300 | -3.66044900 | -2.17250100 |
| H | -0.30335700 | -3.16533800 | -3.14019500 |
| H | 0.02659400  | -4.65677500 | -2.18065400 |
| H | -1.52186900 | -3.74260100 | -1.93582600 |
| C | 1.99939000  | -2.18273500 | 4.47476100  |
| H | 1.01649400  | -2.15334900 | 4.97878100  |
| H | 2.44786900  | -3.18087900 | 4.63144500  |
| H | 2.65411200  | -1.40631000 | 4.89208100  |
| C | 5.87651800  | 0.80580200  | 0.01834800  |
| H | 6.40225000  | 0.46607000  | 0.92793400  |
| H | 6.27035700  | 0.28062700  | -0.86096700 |
| H | 6.01863500  | 1.89511100  | -0.09783000 |
| C | -0.43103000 | 0.40446400  | 3.49324300  |
| H | -0.72494800 | 1.43715300  | 3.74739700  |
| H | -1.32810700 | -0.19018800 | 3.28896200  |
| H | 0.15396700  | -0.03222900 | 4.31708900  |
| C | 2.13717400  | 2.80447400  | -0.87230100 |
| H | 3.10269500  | 2.28500600  | -0.94304000 |
| H | 1.76143500  | 2.62726600  | 0.14328500  |
| C | 1.19498500  | 2.19026400  | -1.88990800 |
| C | -0.21810000 | 2.41700800  | -1.72676800 |
| H | -0.56627000 | 2.96992200  | -0.85143700 |
| C | -1.17079000 | 1.69913900  | -2.47071400 |
| H | -2.21971400 | 1.73350600  | -2.17233300 |
| H | -0.94958700 | 1.31093600  | -3.46856200 |
| C | 1.81531600  | 1.95834400  | -3.25502000 |
| H | 1.10915700  | 1.52319500  | -3.97357700 |
| H | 2.17064500  | 2.92290300  | -3.66557700 |
| H | 2.67998600  | 1.28627500  | -3.17000300 |
| C | -3.76272200 | -3.15589700 | 0.46948700  |

|   |             |             |             |
|---|-------------|-------------|-------------|
| H | -4.57679200 | -3.89029200 | 0.36803300  |
| H | -3.01070900 | -3.54427700 | 1.18563700  |
| H | -4.19582800 | -2.22635900 | 0.87737100  |
| O | -3.20534200 | -2.94610400 | -0.82530600 |
| C | -3.05400700 | 2.27774700  | 1.05869200  |
| C | -4.20152000 | 1.89691400  | 0.27998000  |
| C | -5.32089300 | 2.75843400  | 0.27481900  |
| C | -5.27428400 | 3.95248700  | 1.01059200  |
| C | -4.13182700 | 4.30639000  | 1.76365200  |
| C | -3.00489900 | 3.46473700  | 1.79790200  |
| C | -2.58560500 | 0.30812700  | -0.00564800 |
| H | -6.21250000 | 2.49327000  | -0.29827500 |
| H | -6.13792900 | 4.62196400  | 1.00265200  |
| H | -4.12186600 | 5.24194800  | 2.32740000  |
| H | -2.11684300 | 3.73265400  | 2.37757400  |
| N | -2.11412900 | 1.27780500  | 0.89765600  |
| H | -1.14616800 | 1.27816900  | 1.20143200  |
| O | -1.78781300 | -0.65327700 | -0.40463300 |
| C | -3.89092100 | 0.66045700  | -0.38539500 |
| H | -2.64258100 | -2.13197000 | -0.74553300 |
| C | -4.74555600 | -0.09308500 | -1.36480300 |
| H | -4.10192000 | -0.77144100 | -1.94640800 |
| H | -5.18886800 | 0.62422000  | -2.08463100 |
| C | -5.88562800 | -0.92689700 | -0.77533900 |
| C | -6.33034400 | -2.07270800 | -1.46261900 |
| C | -6.51583000 | -0.58428900 | 0.43598700  |
| C | -7.37960700 | -2.85575100 | -0.95963300 |
| H | -5.82279200 | -2.36585200 | -2.38400600 |
| C | -7.56835000 | -1.36430900 | 0.94282900  |
| H | -6.16828900 | 0.28879500  | 0.98896200  |

|   |             |             |             |
|---|-------------|-------------|-------------|
| C | -8.00551100 | -2.50309200 | 0.24798200  |
| H | -7.70108700 | -3.74788900 | -1.50340000 |
| H | -8.04316600 | -1.08298900 | 1.88634500  |
| H | -8.82043500 | -3.11326100 | 0.64516800  |
| C | 1.53288300  | 7.72895700  | -0.32610700 |
| H | 1.20788100  | 7.65670700  | 0.71426600  |
| H | 1.84048400  | 8.71607700  | -0.67919000 |
| C | 1.16914500  | 5.23910400  | -0.78979900 |
| H | 0.36902300  | 4.93722300  | -1.49099000 |
| C | 0.63831900  | 5.08183500  | 0.64592300  |
| H | 0.30488000  | 4.05237100  | 0.83885100  |
| H | 1.42831000  | 5.32272200  | 1.37670700  |
| H | -0.21697100 | 5.75175500  | 0.82178700  |

**TS7b**

|    |            |             |             |
|----|------------|-------------|-------------|
| C  | 0.35639900 | 6.96250000  | -1.99530400 |
| H  | 0.69295600 | 6.72867800  | -3.01341100 |
| C  | 1.47420600 | 4.93822500  | -1.05178400 |
| H  | 2.21807000 | 5.51894800  | -0.47894200 |
| H  | 1.87761000 | 4.82601100  | -2.07239200 |
| Pd | 0.07783100 | 0.78778900  | -0.12878100 |
| C  | 3.62241600 | -0.19878200 | 0.11665400  |
| C  | 4.52252800 | -0.31826900 | 1.20525700  |
| C  | 4.11589500 | 0.39244000  | -1.07592700 |
| C  | 5.81222200 | 0.25117800  | 1.14338800  |
| C  | 5.41108500 | 0.93601500  | -1.15752900 |
| C  | 6.24128100 | 0.87699700  | -0.03109800 |
| H  | 6.48697900 | 0.16804200  | 1.99420300  |
| H  | 5.76406100 | 1.39727000  | -2.07832300 |
| H  | 7.24418100 | 1.30623500  | -0.07807900 |
| O  | 3.23900000 | 0.39033100  | -2.12934500 |

|   |             |             |             |
|---|-------------|-------------|-------------|
| O | 4.11223600  | -1.05064700 | 2.28317500  |
| C | 4.68880200  | -0.76283800 | 3.55516500  |
| H | 4.04795000  | -1.27094200 | 4.28803900  |
| H | 5.72038100  | -1.15225300 | 3.63172100  |
| H | 4.69028900  | 0.32299100  | 3.74824400  |
| C | 3.74450700  | 0.65165100  | -3.43639000 |
| H | 4.59855600  | -0.00881100 | -3.66541500 |
| H | 2.90935000  | 0.44414300  | -4.11631200 |
| H | 4.05855400  | 1.70546700  | -3.54504700 |
| P | 1.84005900  | -0.70627000 | 0.07779300  |
| C | 1.87875500  | -2.11885000 | -1.11215700 |
| C | 2.71498000  | -3.23412600 | -0.85129400 |
| C | 1.07557100  | -2.14231500 | -2.28201300 |
| C | 2.72417200  | -4.36351000 | -1.68977600 |
| C | 1.07527300  | -3.27828000 | -3.12470500 |
| C | 1.89227100  | -4.37045700 | -2.81631300 |
| H | 3.36044800  | -5.21881300 | -1.46882400 |
| H | 0.44141700  | -3.31087700 | -4.00766300 |
| H | 1.88422900  | -5.24379900 | -3.47223400 |
| C | 1.34079400  | -1.34935400 | 1.75205500  |
| C | 1.33037100  | -0.37501900 | 2.78518400  |
| C | 0.63289300  | -2.56040500 | 1.99163900  |
| C | 0.64592100  | -0.57388500 | 3.99549000  |
| C | -0.08232800 | -2.75178200 | 3.19626000  |
| C | -0.06988200 | -1.76289700 | 4.18714700  |
| H | 0.66399200  | 0.19360200  | 4.76804400  |
| H | -0.63835900 | -3.67438300 | 3.35365000  |
| H | -0.62296600 | -1.92088700 | 5.11472600  |
| O | 0.32906000  | -1.03624600 | -2.55429200 |
| O | 3.47228300  | -3.13529000 | 0.27778900  |



|   |             |             |             |
|---|-------------|-------------|-------------|
| O | 2.02246600  | 0.78387200  | 2.52524900  |
| O | 0.65154900  | -3.50692700 | 1.01397800  |
| C | -0.56917000 | -1.07453800 | -3.67070600 |
| H | -1.07363700 | -0.10069100 | -3.66438000 |
| H | -0.01080300 | -1.19323200 | -4.61705800 |
| H | -1.31671900 | -1.87494200 | -3.55793100 |
| C | 4.07930200  | -4.31005400 | 0.80342200  |
| H | 3.32434700  | -5.09893900 | 0.96470800  |
| H | 4.87183400  | -4.69076400 | 0.13411000  |
| H | 4.51792800  | -4.00139700 | 1.76030400  |
| C | 1.41740600  | 2.02005300  | 2.93098100  |
| H | 1.38315300  | 2.11685200  | 4.03017700  |
| H | 2.06084800  | 2.80536700  | 2.51638000  |
| H | 0.40291700  | 2.10224500  | 2.50975400  |
| C | -0.46846700 | -4.39337600 | 0.88529900  |
| H | -1.40627800 | -3.81919100 | 0.85342700  |
| H | -0.31220300 | -4.90317100 | -0.07335400 |
| H | -0.49005000 | -5.13687600 | 1.70223700  |
| C | 1.33217700  | 3.53186500  | -0.41280100 |
| H | 2.32623300  | 3.05465700  | -0.39536100 |
| H | 1.00112100  | 3.62942200  | 0.63067500  |
| C | 0.37791500  | 2.60747300  | -1.16020700 |
| C | -1.02351900 | 2.62908300  | -0.75642100 |
| H | -1.28967200 | 3.22157000  | 0.12280400  |
| C | -2.08758600 | 2.05536700  | -1.47610000 |
| H | -3.09673200 | 2.42980100  | -1.33107400 |
| H | -1.89732500 | 1.50175200  | -2.39540200 |
| C | 0.73264600  | 2.41246400  | -2.62692600 |
| H | 0.24007600  | 1.53181200  | -3.05366300 |
| H | 0.43751700  | 3.30362200  | -3.21225300 |

|   |             |             |             |
|---|-------------|-------------|-------------|
| H | 1.81493300  | 2.27600200  | -2.72312000 |
| C | -2.60026100 | -4.32197100 | -2.44500000 |
| H | -2.89064500 | -4.97475200 | -3.28388800 |
| H | -1.50044600 | -4.37619300 | -2.32128000 |
| H | -3.07495000 | -4.70822800 | -1.52130300 |
| O | -3.03742900 | -3.00288600 | -2.75544500 |
| C | -2.45596000 | 0.82737300  | 1.84056400  |
| C | -3.48677700 | 1.21540600  | 0.93330900  |
| C | -4.24153700 | 2.37087000  | 1.22383900  |
| C | -3.98437600 | 3.08232300  | 2.40591300  |
| C | -2.98238300 | 2.65716100  | 3.30504800  |
| C | -2.20069700 | 1.52079400  | 3.02633800  |
| C | -2.49095700 | -0.71811900 | 0.12080300  |
| H | -5.02536700 | 2.70219100  | 0.53870900  |
| H | -4.57599500 | 3.97002100  | 2.64033000  |
| H | -2.81308300 | 3.21204600  | 4.23028000  |
| H | -1.42660000 | 1.17716700  | 3.71251000  |
| N | -1.79339400 | -0.28103400 | 1.29468900  |
| H | -1.28467600 | -0.95475300 | 1.86120400  |
| O | -2.23756300 | -1.81198300 | -0.42904400 |
| C | -3.44422600 | 0.33019000  | -0.20007400 |
| H | -2.82123900 | -2.46095700 | -1.95237200 |
| C | -4.53237300 | 0.12552700  | -1.22334900 |
| H | -4.11255300 | -0.37522800 | -2.10996900 |
| H | -4.91916600 | 1.10758700  | -1.54938700 |
| C | -5.67413100 | -0.71711000 | -0.65988400 |
| C | -5.78802100 | -2.08103500 | -0.99070000 |
| C | -6.59888000 | -0.15528700 | 0.24296900  |
| C | -6.80915900 | -2.86525400 | -0.42960300 |
| H | -5.07537900 | -2.52252000 | -1.69016300 |

|   |             |             |             |
|---|-------------|-------------|-------------|
| C | -7.61792600 | -0.93846600 | 0.80410500  |
| H | -6.50898500 | 0.89740900  | 0.51731900  |
| C | -7.72687400 | -2.29894300 | 0.46929200  |
| H | -6.88756900 | -3.92158600 | -0.69899300 |
| H | -8.32758700 | -0.48691000 | 1.50168900  |
| H | -8.52130200 | -2.90989500 | 0.90452600  |
| C | 0.19607800  | 8.24998900  | -1.65145800 |
| H | -0.13260900 | 8.54487900  | -0.65226300 |
| H | 0.38478900  | 9.05481900  | -2.36588300 |
| C | 0.15222700  | 5.74899700  | -1.11280200 |
| H | -0.59680900 | 5.10309500  | -1.60909300 |
| C | -0.37084200 | 6.09066900  | 0.29258300  |
| H | -0.56431100 | 5.17843600  | 0.87478500  |
| H | 0.36828300  | 6.69899800  | 0.84039100  |
| H | -1.30971000 | 6.66289200  | 0.23331300  |

**4**

|   |             |             |             |
|---|-------------|-------------|-------------|
| C | -5.16392100 | -1.13266600 | -0.01459500 |
| H | -4.11435500 | -1.31466800 | 0.23037500  |
| C | -5.05899000 | 1.40332900  | -0.20628000 |
| H | -5.62803400 | 2.30420300  | 0.08180000  |
| H | -5.17999600 | 1.28942000  | -1.29657500 |
| C | -3.57419600 | 1.67108600  | 0.14304400  |
| H | -3.31360200 | 2.65021300  | -0.30348100 |
| H | -3.47818300 | 1.78548500  | 1.23598400  |
| C | -2.56713700 | 0.64883600  | -0.35411400 |
| C | -1.70150400 | 0.07584000  | 0.50943100  |
| H | -1.74286900 | 0.38684900  | 1.55600200  |
| C | -0.62289000 | -0.92622500 | 0.18830900  |
| H | -0.67545200 | -1.77176800 | 0.89604500  |
| H | -0.75089100 | -1.35234900 | -0.81791600 |

|   |             |             |             |
|---|-------------|-------------|-------------|
| C | -2.62587300 | 0.36633000  | -1.83929200 |
| H | -1.76334200 | -0.20740700 | -2.20397100 |
| H | -3.54289700 | -0.19583700 | -2.08608600 |
| H | -2.66816200 | 1.31367500  | -2.40515700 |
| C | 2.70702400  | -1.57168400 | 1.08705100  |
| C | 1.85713900  | -1.43136500 | -0.02885400 |
| C | 2.05595000  | -2.22559900 | -1.15498400 |
| C | 3.11649600  | -3.15501200 | -1.16211800 |
| C | 3.95896500  | -3.27508700 | -0.04487300 |
| C | 3.76531600  | -2.48357900 | 1.10370500  |
| C | 1.19629500  | 0.08467900  | 1.70119100  |
| H | 1.40191800  | -2.12401000 | -2.02427800 |
| H | 3.28454300  | -3.78218600 | -2.03923000 |
| H | 4.77937100  | -3.99519600 | -0.06108600 |
| H | 4.42050900  | -2.57958200 | 1.97137200  |
| N | 2.29041800  | -0.68147800 | 2.08681600  |
| H | 2.74787800  | -0.54977900 | 2.98234300  |
| O | 0.65279400  | 0.93977800  | 2.38956600  |
| C | 0.83417500  | -0.35209900 | 0.25333900  |
| C | 0.98033500  | 0.86993500  | -0.70590900 |
| H | 0.21779300  | 1.60462300  | -0.40939200 |
| H | 0.73190400  | 0.51771400  | -1.72062800 |
| C | 2.36001400  | 1.49543300  | -0.68417500 |
| C | 3.37751900  | 1.03405100  | -1.54055900 |
| C | 2.66015700  | 2.51951400  | 0.23520000  |
| C | 4.66713400  | 1.58219800  | -1.48222900 |
| H | 3.15599500  | 0.23303800  | -2.24827500 |
| C | 3.94909900  | 3.06978100  | 0.29660400  |
| H | 1.87850300  | 2.86898900  | 0.91184900  |
| C | 4.95685700  | 2.60269400  | -0.56235000 |

|   |             |             |             |
|---|-------------|-------------|-------------|
| H | 5.44481400  | 1.21269400  | -2.15441900 |
| H | 4.16522500  | 3.86518500  | 1.01348300  |
| H | 5.96001900  | 3.03244200  | -0.51727800 |
| C | -5.82557500 | -2.04574500 | -0.74362500 |
| H | -6.87492300 | -1.92168100 | -1.02175500 |
| H | -5.33313100 | -2.96046000 | -1.08268900 |
| C | -5.71948400 | 0.18228900  | 0.49816000  |
| H | -5.45314000 | 0.25440500  | 1.57077000  |
| C | -7.25142000 | 0.28416900  | 0.37470000  |
| H | -7.61083500 | 1.21564300  | 0.83939000  |
| H | -7.55549200 | 0.29490900  | -0.68513000 |
| H | -7.74736000 | -0.56904400 | 0.86302900  |

**PB3-TS5b-L1**

|   |             |             |             |
|---|-------------|-------------|-------------|
| C | -0.37623000 | -2.57491700 | 1.75115000  |
| H | 0.24295200  | -1.86848700 | 2.30996900  |
| C | -1.69846700 | -2.08546900 | 1.42996700  |
| C | -2.66351800 | -3.07764100 | 0.76715700  |
| H | -3.68972700 | -2.83861900 | 1.08775500  |
| H | -2.46654100 | -4.11375100 | 1.09995000  |
| C | -2.31989400 | -1.22345400 | 2.54545500  |
| H | -3.16988800 | -0.64339600 | 2.16170200  |
| H | -2.68771200 | -1.83282100 | 3.39138200  |
| H | -1.57347700 | -0.51062700 | 2.93420400  |
| C | 0.26486100  | -3.74802000 | 1.34267800  |
| H | -0.32431300 | -4.61447800 | 1.02905700  |
| H | 1.23719800  | -3.97228200 | 1.78159500  |
| C | -2.66751000 | -3.03750800 | -0.79303000 |
| H | -3.54944400 | -3.61034900 | -1.13959000 |
| H | -2.81710500 | -1.99834500 | -1.10995900 |

|    |             |             |             |
|----|-------------|-------------|-------------|
| C  | -1.44408500 | -3.60537900 | -1.47945200 |
| C  | -0.74913900 | -2.77533700 | -2.39682200 |
| H  | -1.11549100 | -1.75434900 | -2.51291200 |
| C  | 0.54773100  | -3.06403400 | -2.89870800 |
| H  | 1.04703000  | -2.30845800 | -3.50604300 |
| H  | 0.88555300  | -4.09294600 | -3.05362500 |
| C  | -1.33332800 | -5.11841700 | -1.48796800 |
| H  | -1.49467900 | -5.53030200 | -0.47941000 |
| H  | -2.12354600 | -5.54118200 | -2.13766500 |
| H  | -0.35812800 | -5.47011300 | -1.85252300 |
| C  | -1.33347600 | 0.45207100  | -1.21093200 |
| H  | -2.23271900 | -0.04078400 | -1.65318300 |
| H  | -1.68766600 | 1.43153400  | -0.81121600 |
| H  | -0.66893200 | 0.70488300  | -2.06815500 |
| O  | -0.67394800 | -0.32738600 | -0.26687600 |
| H  | -1.35630300 | -1.20580800 | 0.57299500  |
| C  | 5.16251700  | 2.01473400  | 0.84974500  |
| C  | 4.67024400  | 2.49471100  | 2.10998500  |
| C  | 3.31792400  | 2.94337100  | 1.91595700  |
| C  | 2.95448600  | 2.75522400  | 0.53060500  |
| C  | 4.11096200  | 2.17256800  | -0.11104500 |
| H  | 6.13957100  | 1.57259900  | 0.66779600  |
| H  | 5.20041100  | 2.46161400  | 3.06000000  |
| H  | 2.65902300  | 3.30636200  | 2.69855300  |
| H  | 4.15672700  | 1.88667500  | -1.15664900 |
| Fe | 3.49698600  | 0.97711600  | 1.44779800  |
| C  | 1.85996800  | -0.24834400 | 1.48329500  |
| C  | 2.21591000  | 0.17874200  | 2.80533500  |
| C  | 2.97470400  | -0.98650700 | 0.94071100  |
| H  | 0.92237400  | -0.08337600 | 0.94652200  |

|   |             |             |             |
|---|-------------|-------------|-------------|
| C | 3.56300000  | -0.24504800 | 3.07292200  |
| H | 1.60001500  | 0.77981800  | 3.46926800  |
| C | 4.04285200  | -0.94120300 | 1.91389900  |
| H | 4.14248600  | -0.01381700 | 3.96444600  |
| H | 5.03296300  | -1.37312900 | 1.79108000  |
| C | 3.35623100  | -1.14292400 | -2.01191800 |
| C | 4.81983300  | -0.67459100 | -1.91350100 |
| C | 2.35556200  | 0.00268500  | -2.23928200 |
| H | 3.26129300  | -1.86744900 | -2.83790300 |
| H | 5.51684300  | -1.52546300 | -1.97096800 |
| H | 5.05484300  | 0.01521400  | -2.74240600 |
| H | 4.99179900  | -0.14738700 | -0.96433700 |
| H | 1.33322900  | -0.38007800 | -2.36282900 |
| H | 2.32843700  | 0.68058700  | -1.37935300 |
| H | 2.64055500  | 0.58246300  | -3.13402300 |
| C | 4.18080000  | -3.35952300 | -0.25160200 |
| C | 4.31645900  | -4.22102000 | -1.52211800 |
| C | 3.89122400  | -4.24695700 | 0.97243600  |
| H | 5.11940200  | -2.80350000 | -0.08756300 |
| H | 4.61826800  | -3.62486500 | -2.39635400 |
| H | 5.07409200  | -5.00651100 | -1.36296400 |
| H | 3.35504600  | -4.71059400 | -1.75065600 |
| H | 3.73352200  | -3.65106100 | 1.88399000  |
| H | 2.98804300  | -4.84952100 | 0.79109500  |
| H | 4.73787100  | -4.93301100 | 1.14481900  |
| C | 0.14167400  | 3.73990100  | 0.76183300  |
| C | 0.37908600  | 4.98674200  | 1.63719900  |
| C | -0.25891700 | 2.53008200  | 1.63451700  |
| H | -0.70971900 | 3.95390500  | 0.09234500  |
| H | 0.46515400  | 5.90236800  | 1.03575900  |

|    |             |             |             |
|----|-------------|-------------|-------------|
| H  | -0.47335700 | 5.11778900  | 2.32845400  |
| H  | 1.29202300  | 4.89531300  | 2.24373900  |
| H  | -1.16810400 | 2.78057100  | 2.20986400  |
| H  | -0.45695400 | 1.62537900  | 1.04026700  |
| H  | 0.54243300  | 2.29876200  | 2.35106100  |
| C  | 2.16121500  | 4.84095900  | -1.22062100 |
| C  | 3.05467400  | 5.73079000  | -0.33393600 |
| C  | 1.01573400  | 5.64348300  | -1.86797200 |
| H  | 2.79839000  | 4.45975100  | -2.03959700 |
| H  | 3.89105300  | 5.15705000  | 0.09156300  |
| H  | 3.47371700  | 6.55325200  | -0.94164300 |
| H  | 2.49331000  | 6.18028300  | 0.49670800  |
| H  | 0.41188400  | 5.01135900  | -2.53636100 |
| H  | 0.34383400  | 6.06560400  | -1.10441100 |
| H  | 1.42450200  | 6.48382800  | -2.45540000 |
| P  | 2.81623200  | -2.09709000 | -0.49618100 |
| P  | 1.47908800  | 3.21019800  | -0.47522700 |
| Pd | 0.66501700  | -2.85526000 | -0.70545400 |
| C  | -5.85601400 | -0.89072100 | 1.26181200  |
| C  | -5.31652000 | 0.41312200  | 1.27025300  |
| C  | -5.31231800 | 1.15197400  | 2.45122300  |
| C  | -5.84784500 | 0.57682300  | 3.62231900  |
| C  | -6.37262700 | -0.72590900 | 3.59704900  |
| C  | -6.38532300 | -1.48456000 | 2.41014600  |
| C  | -5.15916100 | -0.52185700 | -0.92788400 |
| H  | -4.88706600 | 2.15803500  | 2.47011700  |
| H  | -5.84798600 | 1.14380300  | 4.55470200  |
| H  | -6.77794100 | -1.16364300 | 4.51135400  |
| H  | -6.79131100 | -2.49761700 | 2.39220300  |
| N  | -5.73593700 | -1.41821100 | -0.03241900 |



|   |             |             |             |
|---|-------------|-------------|-------------|
| H | -6.08264300 | -2.32245300 | -0.33292800 |
| O | -5.02119800 | -0.72863100 | -2.12806900 |
| C | -4.75531000 | 0.72449400  | -0.09926500 |
| H | -3.65340600 | 0.71855300  | -0.05029200 |
| C | -5.21512900 | 2.07976700  | -0.72664500 |
| H | -5.49007700 | 2.75430000  | 0.09934300  |
| H | -6.13079600 | 1.90448400  | -1.31468900 |
| C | -4.15631200 | 2.75066600  | -1.58381300 |
| C | -3.75960900 | 2.19366800  | -2.81571400 |
| C | -3.53357700 | 3.93198100  | -1.14033100 |
| C | -2.76188300 | 2.80935600  | -3.58418500 |
| H | -4.21983600 | 1.26339300  | -3.14798600 |
| C | -2.53788800 | 4.55390700  | -1.91136100 |
| H | -3.83296100 | 4.36790000  | -0.18297700 |
| C | -2.15045800 | 3.99237700  | -3.13754300 |
| H | -2.45956300 | 2.36334100  | -4.53425500 |
| H | -2.06583600 | 5.47190700  | -1.55616300 |
| H | -1.38079800 | 4.47471500  | -3.74291900 |

**PA3-TS4a-L3**

|   |             |             |             |
|---|-------------|-------------|-------------|
| C | 1.98457900  | -3.14087600 | -0.46742700 |
| H | 2.26805300  | -3.01476500 | 0.58274700  |
| C | 0.62647400  | -3.51502700 | -0.70031000 |
| C | -0.31561800 | -3.39568600 | 0.36749900  |
| H | 0.03611600  | -3.44349900 | 1.40381100  |
| H | -1.34644600 | -3.71910500 | 0.20344200  |
| C | 0.16730400  | -3.91162200 | -2.09460000 |
| H | 0.51671700  | -3.18832500 | -2.84701700 |
| H | 0.56858800  | -4.90341400 | -2.37063400 |
| H | -0.93125200 | -3.95191400 | -2.13638500 |

|    |             |             |             |
|----|-------------|-------------|-------------|
| C  | 1.57733100  | 0.34082000  | -2.62206600 |
| H  | 0.94941300  | 1.21971900  | -2.40908000 |
| H  | 2.55303500  | 0.69456500  | -3.01073800 |
| H  | 1.07503200  | -0.24623300 | -3.42123100 |
| O  | 1.75623900  | -0.40803000 | -1.43880600 |
| C  | 2.92430700  | -2.74160600 | -1.46761900 |
| H  | 2.47562200  | -1.44430200 | -1.58845100 |
| H  | 3.97284800  | -2.69051600 | -1.15764400 |
| H  | 2.78259700  | -3.15772800 | -2.47382700 |
| Pd | 0.12904500  | -1.38259100 | -0.25857500 |
| C  | -1.92697700 | 0.91727100  | 1.70210300  |
| C  | -3.08627600 | 1.71315000  | 1.89030900  |
| C  | -1.05654000 | 0.73829700  | 2.80309000  |
| C  | -3.38483600 | 2.29967700  | 3.13372200  |
| C  | -1.35287200 | 1.31787200  | 4.05765900  |
| C  | -2.50870100 | 2.08879400  | 4.20706600  |
| H  | -4.27709000 | 2.91000600  | 3.26434900  |
| H  | -0.68288700 | 1.17507900  | 4.90306000  |
| P  | -1.67993900 | -0.02621300 | 0.12733400  |
| C  | -3.29080100 | -0.97009500 | 0.09561300  |
| C  | -4.36617200 | -0.82747200 | -0.81735700 |
| C  | -3.39991200 | -2.00822300 | 1.06373000  |
| C  | -5.41815100 | -1.76791000 | -0.85982600 |
| C  | -4.45021100 | -2.94590900 | 1.03479100  |
| C  | -5.44275100 | -2.82483900 | 0.05474000  |
| H  | -6.22653800 | -1.65194900 | -1.58061200 |
| H  | -4.50274500 | -3.74635600 | 1.77046800  |
| C  | -1.67648400 | 1.17505200  | -1.28500900 |
| C  | -1.43389800 | 2.56746000  | -1.16825200 |
| C  | -1.74013900 | 0.63718100  | -2.59734600 |

|   |             |             |             |
|---|-------------|-------------|-------------|
| C | -1.36548000 | 3.39670300  | -2.30949900 |
| C | -1.66477400 | 1.45296100  | -3.74127500 |
| C | -1.49059600 | 2.83304000  | -3.58311100 |
| H | -1.19714000 | 4.46660000  | -2.20031600 |
| H | -1.72788900 | 1.02149200  | -4.73838700 |
| O | -1.89470000 | -0.72186200 | -2.66624800 |
| O | -1.22579500 | 3.04617600  | 0.09171900  |
| O | 0.06462000  | -0.01461400 | 2.59744700  |
| O | -3.86900200 | 1.86821100  | 0.78351800  |
| O | -2.42270200 | -2.01987800 | 2.01936300  |
| O | -4.36587800 | 0.27654300  | -1.62573300 |
| C | -1.78819700 | -1.35706500 | -3.93643600 |
| H | -2.61604200 | -1.05676600 | -4.60389400 |
| H | -0.82495200 | -1.11565500 | -4.41814100 |
| H | -1.84328400 | -2.43213100 | -3.73073200 |
| C | -1.20378400 | 4.45287700  | 0.31279200  |
| H | -0.30135300 | 4.91069900  | -0.12660700 |
| H | -2.10760800 | 4.93247400  | -0.10349600 |
| H | -1.18308800 | 4.57077200  | 1.40355900  |
| C | 0.69931200  | -0.59975600 | 3.74017600  |
| H | 1.18403900  | 0.16933800  | 4.36772600  |
| H | -0.03867300 | -1.14841600 | 4.35193300  |
| H | 1.46571300  | -1.27281800 | 3.34162800  |
| C | -5.15368000 | 2.46195100  | 0.92414900  |
| H | -5.75554900 | 1.93421200  | 1.68516100  |
| H | -5.07502200 | 3.52899600  | 1.20210000  |
| H | -5.62311100 | 2.36375700  | -0.06213900 |
| C | -5.06935700 | 0.21259900  | -2.86244100 |
| H | -4.85560500 | -0.73210400 | -3.39176400 |
| H | -6.16146400 | 0.30383000  | -2.71563700 |

|   |             |             |             |
|---|-------------|-------------|-------------|
| H | -4.70055300 | 1.06295400  | -3.45151100 |
| C | -2.37818300 | -3.09630800 | 2.94872700  |
| H | -3.27802700 | -3.10710500 | 3.58930800  |
| H | -2.28413500 | -4.06564200 | 2.42924200  |
| H | -1.48586100 | -2.91610700 | 3.56049600  |
| H | -2.73085400 | 2.53901200  | 5.17713200  |
| H | -1.43000500 | 3.47398500  | -4.46497800 |
| H | -6.25997100 | -3.54847600 | 0.02271200  |
| C | 5.80026000  | -1.16946800 | 0.23333300  |
| C | 4.84799300  | -0.15721900 | -0.01166600 |
| C | 5.03448100  | 0.71853900  | -1.08151000 |
| C | 6.18809000  | 0.58149200  | -1.88157900 |
| C | 7.13014600  | -0.42592500 | -1.61565900 |
| C | 6.94751800  | -1.32699400 | -0.54806200 |
| C | 4.13115300  | -1.53102300 | 1.81001400  |
| H | 4.29626900  | 1.49005800  | -1.29225300 |
| H | 6.34674100  | 1.26294500  | -2.71963000 |
| H | 8.01673100  | -0.52116100 | -2.24625600 |
| H | 7.67103300  | -2.11953700 | -0.34636500 |
| N | 5.36394400  | -1.94487900 | 1.32265300  |
| H | 5.83254200  | -2.77027200 | 1.68006100  |
| O | 3.52392100  | -2.08024200 | 2.72890300  |
| C | 3.72377300  | -0.29298400 | 0.98869600  |
| H | 2.77689300  | -0.50132900 | 0.46848800  |
| C | 3.48914500  | 0.94504100  | 1.90723700  |
| H | 4.36992800  | 1.09430100  | 2.55273300  |
| H | 2.63009200  | 0.71220200  | 2.55026300  |
| C | 3.23045200  | 2.19312000  | 1.08889600  |
| C | 2.10664500  | 2.27265300  | 0.24232100  |
| C | 4.16410000  | 3.24555000  | 1.08330000  |

|   |            |            |             |
|---|------------|------------|-------------|
| C | 1.94725300 | 3.37086500 | -0.61503000 |
| H | 1.39122300 | 1.45109700 | 0.21518600  |
| C | 3.99339900 | 4.35762500 | 0.24357100  |
| H | 5.04411500 | 3.17812700 | 1.72810000  |
| C | 2.88699800 | 4.41649500 | -0.61795400 |
| H | 1.09597100 | 3.39908500 | -1.29492800 |
| H | 4.73145800 | 5.16322100 | 0.24938500  |
| H | 2.76021400 | 5.26672400 | -1.29287700 |

**Intlc**

|    |             |             |             |
|----|-------------|-------------|-------------|
| C  | -3.15704800 | -4.11195400 | -1.32399600 |
| C  | -3.79668700 | -3.54550000 | -0.17044000 |
| C  | -2.84087100 | -2.71163300 | 0.49804000  |
| C  | -1.59518200 | -2.75740000 | -0.23200800 |
| C  | -1.80378100 | -3.63313600 | -1.36366600 |
| H  | -3.63228700 | -4.73963200 | -2.07533000 |
| H  | -4.84006800 | -3.66838600 | 0.11159000  |
| H  | -3.03352400 | -2.09336500 | 1.36624400  |
| H  | -1.07632500 | -3.83145300 | -2.14498800 |
| Fe | -3.10448300 | -2.06888900 | -1.40591100 |
| C  | -4.59424800 | -0.70153000 | -1.64951200 |
| C  | -4.42177500 | -1.46716200 | -2.85236400 |
| C  | -3.33806600 | -0.05866800 | -1.33922800 |
| H  | -5.48646600 | -0.66290200 | -1.03070500 |
| C  | -3.06671500 | -1.29817400 | -3.30039700 |
| H  | -5.16738600 | -2.11718100 | -3.30638100 |
| C  | -2.39838900 | -0.43441900 | -2.37163500 |
| H  | -2.60650100 | -1.79488400 | -4.15165600 |
| H  | -1.34553900 | -0.16776000 | -2.37592800 |
| P  | -2.84187400 | 0.96902700  | 0.09315800  |

|    |             |             |             |
|----|-------------|-------------|-------------|
| P  | -0.12621300 | -1.73501100 | 0.20031700  |
| Pd | -0.65202900 | 0.46599500  | 0.71305300  |
| C  | 0.43170600  | 2.73841000  | 2.47858300  |
| H  | -0.58270300 | 3.14514200  | 2.55253400  |
| C  | 0.55512100  | 1.30809800  | 2.73946000  |
| C  | -0.57534900 | 0.56616100  | 3.05729300  |
| H  | -1.51628800 | 1.07221600  | 3.28152400  |
| H  | -0.47685100 | -0.47074000 | 3.38452900  |
| C  | 1.93467600  | 0.68189100  | 2.72500400  |
| H  | 2.57629900  | 1.14191900  | 3.49858100  |
| H  | 1.87461600  | -0.39881400 | 2.90385200  |
| H  | 2.43727900  | 0.84813900  | 1.76064900  |
| C  | -0.01807200 | 2.83123900  | -1.38411000 |
| H  | -0.69897600 | 3.50813800  | -0.84777200 |
| H  | 0.71177100  | 3.40438500  | -1.97887400 |
| H  | -0.60793900 | 2.19724500  | -2.05573800 |
| O  | 0.65716900  | 1.94600100  | -0.46719300 |
| C  | 1.44706500  | 3.55778600  | 2.08334500  |
| H  | 1.02199700  | 2.51570800  | 0.25513200  |
| H  | 1.27077000  | 4.61882100  | 1.89671500  |
| H  | 2.47656500  | 3.20562300  | 2.01136100  |
| C  | 0.67803200  | -2.76508100 | 1.51293800  |
| C  | -0.07464300 | -3.49951100 | 2.45379600  |
| C  | 2.07827100  | -2.68761300 | 1.68016600  |
| C  | 0.56014800  | -4.14089100 | 3.53046800  |
| H  | -1.15627600 | -3.58268200 | 2.33640700  |
| C  | 2.71164100  | -3.33465400 | 2.74916800  |
| H  | 2.67680200  | -2.11336500 | 0.97331500  |
| C  | 1.95390300  | -4.06312500 | 3.68329900  |
| H  | -0.03760800 | -4.71038100 | 4.24631000  |

|   |             |             |             |
|---|-------------|-------------|-------------|
| H | 3.79704900  | -3.26227700 | 2.84952100  |
| H | 2.44445900  | -4.56404000 | 4.52064700  |
| C | 0.95468500  | -2.08962100 | -1.26595700 |
| C | 1.44605800  | -3.38256400 | -1.55004600 |
| C | 1.25992600  | -1.03296700 | -2.14400200 |
| C | 2.20529900  | -3.61543900 | -2.70628100 |
| H | 1.23063000  | -4.20087800 | -0.86085900 |
| C | 2.01947500  | -1.26357500 | -3.30452300 |
| H | 0.92101600  | -0.02396500 | -1.90605800 |
| C | 2.48682800  | -2.55623100 | -3.58904800 |
| H | 2.58303400  | -4.61876100 | -2.91649100 |
| H | 2.25695300  | -0.42082600 | -3.95373600 |
| H | 3.08337000  | -2.73825300 | -4.48571700 |
| C | -3.24690800 | 2.67654900  | -0.50916100 |
| C | -3.15927300 | 3.73783600  | 0.42025000  |
| C | -3.49982600 | 2.97953700  | -1.86235000 |
| C | -3.31778200 | 5.06658300  | 0.00745300  |
| H | -2.95780200 | 3.51553900  | 1.47141600  |
| C | -3.64247600 | 4.31396400  | -2.27905800 |
| H | -3.57589400 | 2.17176600  | -2.59190700 |
| C | -3.55098100 | 5.36095600  | -1.34918600 |
| H | -3.25320700 | 5.87451600  | 0.74021100  |
| H | -3.83123100 | 4.53297000  | -3.33279500 |
| H | -3.66232800 | 6.39745000  | -1.67474800 |
| C | -4.25076300 | 0.68847000  | 1.26910000  |
| C | -4.01646400 | -0.03198400 | 2.45614100  |
| C | -5.54967000 | 1.17514000  | 1.01036700  |
| C | -5.06224600 | -0.28636100 | 3.35807900  |
| H | -3.00623900 | -0.38808000 | 2.66130500  |
| C | -6.59562400 | 0.92420000  | 1.91120900  |

|   |             |             |             |
|---|-------------|-------------|-------------|
| H | -5.73525800 | 1.75501500  | 0.10439800  |
| C | -6.35479500 | 0.18945600  | 3.08546700  |
| H | -4.86570600 | -0.84817100 | 4.27413300  |
| H | -7.59804500 | 1.30348100  | 1.69924000  |
| H | -7.16936000 | -0.00275800 | 3.78723200  |
| C | 4.02956600  | 3.47103200  | -0.44501300 |
| C | 4.25760800  | 2.12681100  | -0.07286400 |
| C | 4.86287600  | 1.84629100  | 1.15249800  |
| C | 5.24352400  | 2.91607100  | 1.99032100  |
| C | 5.02079400  | 4.24562200  | 1.59593700  |
| C | 4.40535300  | 4.54550200  | 0.36524700  |
| C | 3.16293300  | 2.21917800  | -2.20187300 |
| H | 5.03540500  | 0.81471300  | 1.45658900  |
| H | 5.71188700  | 2.70714200  | 2.95349800  |
| H | 5.31824400  | 5.06351000  | 2.25499400  |
| H | 4.22118100  | 5.57807100  | 0.06294100  |
| N | 3.39622200  | 3.49506200  | -1.69614800 |
| H | 3.11272500  | 4.33187500  | -2.19369900 |
| O | 2.61980300  | 1.97786100  | -3.27396600 |
| C | 3.76542900  | 1.22599200  | -1.18270200 |
| H | 2.96732600  | 0.54528100  | -0.85302500 |
| C | 4.88372600  | 0.38931500  | -1.87613600 |
| H | 5.67948600  | 1.07414700  | -2.21056500 |
| H | 4.43093400  | -0.07048200 | -2.76730800 |
| C | 5.45167300  | -0.67382500 | -0.96262300 |
| C | 4.71234000  | -1.84424400 | -0.70477900 |
| C | 6.69384500  | -0.50044400 | -0.32414900 |
| C | 5.20390400  | -2.82097300 | 0.17373900  |
| H | 3.75124400  | -1.98892800 | -1.19733200 |
| C | 7.18754900  | -1.47376000 | 0.55974900  |



|             |             |             |             |
|-------------|-------------|-------------|-------------|
| H           | 7.26847600  | 0.40884400  | -0.51510100 |
| C           | 6.44215500  | -2.63705300 | 0.81268000  |
| H           | 4.61286200  | -3.71875600 | 0.36316100  |
| H           | 8.15269500  | -1.32369000 | 1.04886000  |
| H           | 6.82574500  | -3.39703500 | 1.49709700  |
| <b>TS1c</b> |             |             |             |
| C           | 3.12169900  | -4.03572300 | 1.52716300  |
| C           | 3.77799800  | -3.52143900 | 0.35881600  |
| C           | 2.82672100  | -2.73616600 | -0.37143800 |
| C           | 1.56787700  | -2.75892000 | 0.33706300  |
| C           | 1.76258500  | -3.57317200 | 1.51684100  |
| H           | 3.58870800  | -4.61812400 | 2.31879500  |
| H           | 4.82793300  | -3.64592500 | 0.10351600  |
| H           | 3.02982500  | -2.16541900 | -1.26873500 |
| H           | 1.02174100  | -3.73962800 | 2.29274600  |
| Fe          | 3.03891300  | -1.99158000 | 1.50164500  |
| C           | 4.51047000  | -0.60278500 | 1.73051800  |
| C           | 4.29415400  | -1.30379000 | 2.96475500  |
| C           | 3.26372800  | 0.01414600  | 1.33821300  |
| H           | 5.42639000  | -0.58921300 | 1.14631800  |
| C           | 2.92138900  | -1.12065500 | 3.34905100  |
| H           | 5.02455600  | -1.92232200 | 3.48265500  |
| C           | 2.28512000  | -0.31313400 | 2.35068900  |
| H           | 2.42981600  | -1.57380600 | 4.20692400  |
| H           | 1.23325000  | -0.04920700 | 2.30344700  |
| P           | 2.83003900  | 0.96481500  | -0.16198900 |
| P           | 0.10151300  | -1.76790100 | -0.15302500 |
| Pd          | 0.56075500  | 0.42238300  | -0.80501600 |
| C           | -0.24695700 | 2.41361300  | -2.31726800 |
| H           | 0.78449700  | 2.75261700  | -2.45119800 |

|   |             |             |             |
|---|-------------|-------------|-------------|
| C | -0.54028100 | 1.07754800  | -2.72999500 |
| C | 0.54583500  | 0.21646700  | -3.02903500 |
| H | 1.50098100  | 0.65126000  | -3.33434100 |
| H | 0.34458700  | -0.80185300 | -3.36999000 |
| C | -1.97654200 | 0.58678100  | -2.75739500 |
| H | -2.55321000 | 1.13379500  | -3.52423900 |
| H | -2.01600400 | -0.48687400 | -2.98156100 |
| H | -2.47379300 | 0.76579800  | -1.79451200 |
| C | 0.09161000  | 2.68113100  | 1.49021200  |
| H | 0.64233300  | 3.48178100  | 0.95979500  |
| H | -0.60227400 | 3.14160100  | 2.21938900  |
| H | 0.83003600  | 2.09738400  | 2.06350800  |
| O | -0.60635300 | 1.84056100  | 0.58207700  |
| C | -1.15442600 | 3.23553200  | -1.57712800 |
| H | -0.99529300 | 2.64836900  | -0.41147600 |
| H | -0.86932200 | 4.28987800  | -1.47464400 |
| H | -2.22113500 | 3.09202200  | -1.78140800 |
| C | -0.68152000 | -2.82168400 | -1.45463200 |
| C | 0.08464600  | -3.59605900 | -2.34987600 |
| C | -2.07677300 | -2.73810700 | -1.64833300 |
| C | -0.53490000 | -4.27245700 | -3.41407200 |
| H | 1.16307900  | -3.68175700 | -2.20775800 |
| C | -2.69461900 | -3.41958100 | -2.70525200 |
| H | -2.68363300 | -2.13510500 | -0.97345200 |
| C | -1.92471000 | -4.18785000 | -3.59614900 |
| H | 0.07096800  | -4.87313800 | -4.09655200 |
| H | -3.77707300 | -3.34266800 | -2.82899200 |
| H | -2.40346300 | -4.71594400 | -4.42349800 |
| C | -1.00508700 | -2.05342100 | 1.30105000  |
| C | -1.48778500 | -3.34243900 | 1.61772400  |

|   |             |             |             |
|---|-------------|-------------|-------------|
| C | -1.32810700 | -0.96786700 | 2.13619400  |
| C | -2.25730700 | -3.54468900 | 2.77235200  |
| H | -1.25720400 | -4.18101400 | 0.95836300  |
| C | -2.09676800 | -1.17255000 | 3.29622700  |
| H | -1.00767500 | 0.03902100  | 1.85822400  |
| C | -2.55418000 | -2.45975200 | 3.61816600  |
| H | -2.62961900 | -4.54387000 | 3.00981700  |
| H | -2.35039300 | -0.31126300 | 3.91383300  |
| H | -3.15741800 | -2.61829300 | 4.51487500  |
| C | 3.22464700  | 2.70205300  | 0.34589600  |
| C | 3.09084100  | 3.71463900  | -0.62921800 |
| C | 3.55693300  | 3.06660300  | 1.66554600  |
| C | 3.28112900  | 5.06079400  | -0.29250800 |
| H | 2.83318700  | 3.44434000  | -1.65621700 |
| C | 3.73536400  | 4.41759400  | 2.00562600  |
| H | 3.66403100  | 2.29528800  | 2.42950300  |
| C | 3.59677000  | 5.41777200  | 1.03090000  |
| H | 3.17628200  | 5.83237400  | -1.05869300 |
| H | 3.98539900  | 4.68670100  | 3.03450600  |
| H | 3.73404100  | 6.46782000  | 1.29771300  |
| C | 4.27513600  | 0.60974000  | -1.27239700 |
| C | 4.08637900  | -0.18308400 | -2.42108400 |
| C | 5.56290200  | 1.11841200  | -0.99900200 |
| C | 5.16487600  | -0.48741900 | -3.26748500 |
| H | 3.08836700  | -0.56029700 | -2.64464200 |
| C | 6.64151300  | 0.81603600  | -1.84339500 |
| H | 5.71377300  | 1.75658500  | -0.12648400 |
| C | 6.44552500  | 0.00919300  | -2.97792900 |
| H | 5.00243500  | -1.10470600 | -4.15392300 |
| H | 7.63440500  | 1.21250200  | -1.61894000 |

|   |             |             |             |
|---|-------------|-------------|-------------|
| H | 7.28535600  | -0.22229600 | -3.63658600 |
| C | -3.90826600 | 3.57467300  | 0.38924600  |
| C | -4.21208700 | 2.24399400  | 0.02268200  |
| C | -4.79344600 | 1.98948000  | -1.21893700 |
| C | -5.07095100 | 3.07086100  | -2.08252100 |
| C | -4.76986500 | 4.38691700  | -1.69571200 |
| C | -4.18200600 | 4.66049900  | -0.44566100 |
| C | -3.17926600 | 2.29453300  | 2.18318400  |
| H | -5.02337900 | 0.96766400  | -1.51879300 |
| H | -5.52054900 | 2.88114600  | -3.05880200 |
| H | -4.98648400 | 5.21450700  | -2.37420700 |
| H | -3.93570900 | 5.68172700  | -0.14914400 |
| N | -3.31886200 | 3.57440500  | 1.65974200  |
| H | -2.95744800 | 4.39202800  | 2.13779000  |
| O | -2.70661200 | 2.03388200  | 3.28420300  |
| C | -3.78596200 | 1.32389900  | 1.14383300  |
| H | -2.98427800 | 0.64088300  | 0.82796300  |
| C | -4.93269200 | 0.49852800  | 1.79582600  |
| H | -5.74039200 | 1.18782700  | 2.09014900  |
| H | -4.52027600 | 0.04762100  | 2.71102000  |
| C | -5.46797800 | -0.57686900 | 0.87579900  |
| C | -4.73982700 | -1.76786100 | 0.68718400  |
| C | -6.67310000 | -0.40077000 | 0.17006800  |
| C | -5.20730100 | -2.76125900 | -0.18615500 |
| H | -3.80767300 | -1.91642100 | 1.23166200  |
| C | -7.14044400 | -1.38921400 | -0.71135600 |
| H | -7.23976600 | 0.52296100  | 0.30775100  |
| C | -6.40757700 | -2.57363500 | -0.89268700 |
| H | -4.62771700 | -3.67694600 | -0.31714800 |
| H | -8.07687100 | -1.23548800 | -1.25250000 |

|              |             |             |             |
|--------------|-------------|-------------|-------------|
| H            | -6.77260200 | -3.34707200 | -1.57230700 |
| <b>Int2c</b> |             |             |             |
| C            | -3.02912700 | -3.92980200 | -1.76427100 |
| C            | -3.73361800 | -3.45677100 | -0.60632600 |
| C            | -2.80888700 | -2.71981700 | 0.20384100  |
| C            | -1.51901600 | -2.73186700 | -0.44650900 |
| C            | -1.66614600 | -3.49083500 | -1.66994600 |
| H            | -3.46559700 | -4.47049600 | -2.60142200 |
| H            | -4.79581100 | -3.57698100 | -0.40559900 |
| H            | -3.04797100 | -2.19418800 | 1.11922200  |
| H            | -0.88623300 | -3.63732900 | -2.41085800 |
| Fe           | -2.91666600 | -1.88930100 | -1.64035200 |
| C            | -4.37101900 | -0.49590600 | -1.90685600 |
| C            | -4.05195400 | -1.12396800 | -3.15833800 |
| C            | -3.16175400 | 0.10422200  | -1.38768500 |
| H            | -5.33053200 | -0.52103700 | -1.39782000 |
| C            | -2.65417200 | -0.91358700 | -3.42150400 |
| H            | -4.73477700 | -1.71364100 | -3.76689400 |
| C            | -2.10264600 | -0.16039300 | -2.33594800 |
| H            | -2.09340700 | -1.31663700 | -4.26169200 |
| H            | -1.06333300 | 0.11780100  | -2.18020600 |
| P            | -2.82884000 | 0.95032500  | 0.19432500  |
| P            | -0.05072400 | -1.79547900 | 0.11799500  |
| Pd           | -0.40302800 | 0.42645500  | 0.81769800  |
| C            | 0.10737800  | 2.25352900  | 2.20141800  |
| H            | -0.92067600 | 2.54763100  | 2.42557200  |
| C            | 0.56681000  | 1.01891600  | 2.71920900  |
| C            | -0.45233500 | 0.03607400  | 2.96995400  |
| H            | -1.42702900 | 0.37969700  | 3.32635400  |
| H            | -0.15485400 | -0.96619400 | 3.28587800  |

|   |             |             |             |
|---|-------------|-------------|-------------|
| C | 2.04309600  | 0.70461300  | 2.83933700  |
| H | 2.46095400  | 1.20122700  | 3.73447500  |
| H | 2.20421300  | -0.37666100 | 2.93696400  |
| H | 2.59757400  | 1.07803900  | 1.96965000  |
| C | -0.18549300 | 2.51892200  | -1.42445400 |
| H | -0.41231200 | 3.29147400  | -0.65741900 |
| H | 0.45317100  | 2.98918000  | -2.20220900 |
| H | -1.15146000 | 2.27670500  | -1.91872000 |
| O | 0.46730700  | 1.39737000  | -0.90514300 |
| C | 1.02830800  | 3.29154200  | 1.62295200  |
| H | 1.46701900  | 2.90296100  | 0.69018300  |
| H | 0.48405600  | 4.21760500  | 1.39107900  |
| H | 1.86278300  | 3.52954000  | 2.30437400  |
| C | 0.63149500  | -2.84268700 | 1.47975200  |
| C | -0.17239200 | -3.69547000 | 2.26037400  |
| C | 1.99536600  | -2.69539700 | 1.80810500  |
| C | 0.37999600  | -4.38409600 | 3.35415600  |
| H | -1.22549200 | -3.82998000 | 2.00948500  |
| C | 2.54658100  | -3.38842100 | 2.89390700  |
| H | 2.62991600  | -2.03918000 | 1.21213700  |
| C | 1.73827400  | -4.23313000 | 3.67502400  |
| H | -0.25309500 | -5.04537800 | 3.95019600  |
| H | 3.60650700  | -3.26340800 | 3.12557200  |
| H | 2.16451100  | -4.77065000 | 4.52466000  |
| C | 1.12503600  | -2.15256400 | -1.26002500 |
| C | 1.63651400  | -3.45747800 | -1.44207800 |
| C | 1.45933300  | -1.13421400 | -2.17255100 |
| C | 2.46500400  | -3.74117600 | -2.53643000 |
| H | 1.38597100  | -4.24341400 | -0.72761600 |
| C | 2.28722400  | -1.42768300 | -3.27163500 |

|   |             |             |             |
|---|-------------|-------------|-------------|
| H | 1.09847900  | -0.11428200 | -1.99596800 |
| C | 2.78593300  | -2.72606300 | -3.45696600 |
| H | 2.86260300  | -4.74990200 | -2.66944500 |
| H | 2.55039700  | -0.61894500 | -3.95337900 |
| H | 3.43533200  | -2.94871500 | -4.30680900 |
| C | -3.28776000 | 2.70874400  | -0.16235900 |
| C | -3.22353400 | 3.63332000  | 0.90252900  |
| C | -3.63953000 | 3.17025500  | -1.44616400 |
| C | -3.50210700 | 4.99026500  | 0.68840600  |
| H | -2.96459700 | 3.28726100  | 1.90615700  |
| C | -3.91178200 | 4.53057500  | -1.66148900 |
| H | -3.69006000 | 2.46572100  | -2.27757700 |
| C | -3.84246600 | 5.44419300  | -0.59746600 |
| H | -3.45075500 | 5.69314300  | 1.52305100  |
| H | -4.18064400 | 4.87530500  | -2.66263200 |
| H | -4.05339000 | 6.50214400  | -0.76750000 |
| C | -4.28738100 | 0.46009900  | 1.23541900  |
| C | -4.09021800 | -0.34654200 | 2.37324800  |
| C | -5.59449200 | 0.89477700  | 0.92740500  |
| C | -5.17728500 | -0.74056700 | 3.17075300  |
| H | -3.08056100 | -0.67133800 | 2.62573700  |
| C | -6.68185300 | 0.50012900  | 1.72041700  |
| H | -5.75337300 | 1.55121600  | 0.07008300  |
| C | -6.47594600 | -0.32180400 | 2.84243800  |
| H | -5.00751400 | -1.36786900 | 4.04867200  |
| H | -7.68934000 | 0.83821300  | 1.46741600  |
| H | -7.32282800 | -0.62445200 | 3.46200500  |
| C | 3.68281000  | 3.65950500  | -0.62121900 |
| C | 4.08767000  | 2.39046800  | -0.14602800 |
| C | 4.69147200  | 2.28978100  | 1.10720100  |

|   |            |             |             |
|---|------------|-------------|-------------|
| C | 4.88108500 | 3.45737700  | 1.87735900  |
| C | 4.46970100 | 4.70757600  | 1.38802900  |
| C | 3.86251800 | 4.82830700  | 0.12312600  |
| C | 3.09543100 | 2.18734700  | -2.31876700 |
| H | 5.00778000 | 1.31908300  | 1.48757100  |
| H | 5.35020500 | 3.38595900  | 2.86040400  |
| H | 4.61936400 | 5.60366000  | 1.99400600  |
| H | 3.53806400 | 5.79879500  | -0.25701400 |
| N | 3.11343800 | 3.51108100  | -1.89077000 |
| H | 2.69894600 | 4.25683000  | -2.43806100 |
| O | 2.68742500 | 1.80871100  | -3.40995400 |
| C | 3.72971800 | 1.34901800  | -1.18346300 |
| H | 2.93974600 | 0.67584300  | -0.81690900 |
| C | 4.91663100 | 0.50698900  | -1.72913600 |
| H | 5.71682700 | 1.19161500  | -2.05356800 |
| H | 4.54590600 | -0.02713900 | -2.61676900 |
| C | 5.44900900 | -0.47872300 | -0.71110300 |
| C | 4.74455000 | -1.67075500 | -0.45052200 |
| C | 6.62957700 | -0.21937100 | 0.01046100  |
| C | 5.20903300 | -2.58081200 | 0.51087100  |
| H | 3.83592900 | -1.88730100 | -1.01107400 |
| C | 7.09303100 | -1.12340200 | 0.98039400  |
| H | 7.18028100 | 0.70362600  | -0.18539800 |
| C | 6.38233000 | -2.30781200 | 1.23475900  |
| H | 4.65011200 | -3.50071100 | 0.69285000  |
| H | 8.00996600 | -0.90468600 | 1.53255900  |
| H | 6.74513900 | -3.01634200 | 1.98298000  |

**TS2c**

|   |             |             |             |
|---|-------------|-------------|-------------|
| C | -2.30012900 | -1.64887400 | -3.81131100 |
| C | -3.22165100 | -2.58219900 | -3.22839700 |



|    |             |             |             |
|----|-------------|-------------|-------------|
| C  | -2.73836300 | -2.92833800 | -1.92436000 |
| C  | -1.50449000 | -2.21698300 | -1.69789300 |
| C  | -1.25519100 | -1.40646000 | -2.86482500 |
| H  | -2.41204600 | -1.15585600 | -4.77445700 |
| H  | -4.15771500 | -2.91854600 | -3.66958000 |
| H  | -3.22476500 | -3.58555400 | -1.21046300 |
| H  | -0.41655200 | -0.73626200 | -2.98115000 |
| Fe | -3.09157800 | -0.91114200 | -2.06974600 |
| C  | -4.24481100 | -0.29370300 | -0.50397100 |
| C  | -5.04614200 | -0.53312300 | -1.66989500 |
| C  | -3.30966600 | 0.76739300  | -0.80487500 |
| H  | -4.34382000 | -0.79597000 | 0.45303200  |
| C  | -4.57000500 | 0.32721100  | -2.71672900 |
| H  | -5.82307800 | -1.28855000 | -1.76530900 |
| C  | -3.48958500 | 1.11168400  | -2.19165800 |
| H  | -4.92139700 | 0.33646000  | -3.74627600 |
| H  | -2.90719100 | 1.85032100  | -2.73345200 |
| P  | -2.14303900 | 1.52788300  | 0.38195500  |
| P  | -0.50284100 | -2.27645100 | -0.16627300 |
| Pd | -0.47011000 | -0.02991200 | 0.58100300  |
| C  | 1.40773200  | -1.37130300 | 3.20916000  |
| H  | 0.96063600  | -2.33285800 | 2.93552300  |
| C  | 0.59236900  | -0.28185900 | 3.10246300  |
| C  | -0.79242700 | -0.47115000 | 2.62280800  |
| H  | -1.52188900 | 0.23766700  | 3.03042900  |
| H  | -1.14387900 | -1.50252700 | 2.72354400  |
| C  | 1.01462000  | 1.13919300  | 3.42883000  |
| H  | 0.83234200  | 1.79692900  | 2.56420000  |
| H  | 0.41822600  | 1.53165400  | 4.27156900  |
| H  | 2.07695800  | 1.22118400  | 3.69453800  |

|   |             |             |             |
|---|-------------|-------------|-------------|
| C | 0.38868400  | 1.44423600  | -2.30576800 |
| H | 0.80418400  | 1.11627600  | -3.27687300 |
| H | -0.69521900 | 1.58807600  | -2.40536700 |
| H | 0.86209000  | 2.39771300  | -2.03010700 |
| O | 0.63228500  | 0.43986700  | -1.31606100 |
| C | 3.61170800  | 2.84998800  | -1.72741100 |
| C | 3.27610500  | 2.14982700  | -0.52301000 |
| C | 3.06155300  | 2.89117100  | 0.65070400  |
| C | 3.18052000  | 4.29569900  | 0.61914100  |
| C | 3.50258800  | 4.96410200  | -0.57728200 |
| C | 3.71519200  | 4.24234700  | -1.77257500 |
| C | 3.69255000  | 0.57311900  | -2.20787300 |
| H | 2.83214500  | 2.37759300  | 1.58594400  |
| H | 3.03160700  | 4.87110700  | 1.53632100  |
| H | 3.60027700  | 6.05231700  | -0.58418100 |
| H | 3.97912300  | 4.75852800  | -2.69906500 |
| N | 3.79525800  | 1.89930800  | -2.72314500 |
| H | 4.16407700  | 2.08088900  | -3.64917100 |
| O | 3.92601700  | -0.43623000 | -2.89296700 |
| C | 3.19963300  | 0.73005400  | -0.83227700 |
| H | 1.73666000  | 0.53035600  | -1.10076500 |
| C | 3.41342800  | -0.35409600 | 0.21432300  |
| H | 3.10525300  | -1.31883600 | -0.20699500 |
| H | 2.75781000  | -0.15438200 | 1.07746000  |
| C | 4.86111500  | -0.43484400 | 0.66175200  |
| C | 5.31008500  | 0.22681400  | 1.82022400  |
| C | 5.80135200  | -1.13273600 | -0.12441100 |
| C | 6.66140000  | 0.18218200  | 2.19947100  |
| H | 4.59187500  | 0.78648300  | 2.42303100  |
| C | 7.15137000  | -1.18050100 | 0.25119900  |

|   |             |             |             |
|---|-------------|-------------|-------------|
| H | 5.45851500  | -1.60653400 | -1.04474800 |
| C | 7.58676400  | -0.52754000 | 1.41811300  |
| H | 6.99091100  | 0.70244500  | 3.10250700  |
| H | 7.86822100  | -1.72572100 | -0.36839100 |
| H | 8.63862600  | -0.56663200 | 1.71132300  |
| C | 2.84624500  | -1.43645000 | 3.62679100  |
| H | 3.23129500  | -0.47957300 | 4.00336600  |
| H | 2.98758300  | -2.19838800 | 4.41436600  |
| H | 3.48465500  | -1.73293600 | 2.77536100  |
| C | 1.08710000  | -3.08091300 | -0.58996900 |
| C | 1.69618200  | -2.87052800 | -1.84271400 |
| C | 1.82106400  | -3.72382500 | 0.43463400  |
| C | 3.01057200  | -3.30405800 | -2.07186000 |
| H | 1.16766500  | -2.33569700 | -2.62853200 |
| C | 3.12756400  | -4.16792100 | 0.19606000  |
| H | 1.37025200  | -3.87755000 | 1.41551500  |
| C | 3.72553000  | -3.95800500 | -1.05791900 |
| H | 3.48283400  | -3.08242100 | -3.02695500 |
| H | 3.68430200  | -4.66167600 | 0.99514000  |
| H | 4.75406200  | -4.27807700 | -1.23217700 |
| C | -1.46772500 | -3.51235500 | 0.79980900  |
| C | -1.17872700 | -4.89177000 | 0.80079900  |
| C | -2.61887000 | -3.05131400 | 1.47337600  |
| C | -2.01734300 | -5.78887900 | 1.48078300  |
| H | -0.30460900 | -5.26234000 | 0.26511400  |
| C | -3.46286400 | -3.95002500 | 2.14135000  |
| H | -2.84546100 | -1.98530100 | 1.46240400  |
| C | -3.15979200 | -5.32182700 | 2.15143700  |
| H | -1.78195100 | -6.85520300 | 1.47769100  |
| H | -4.34961400 | -3.57886100 | 2.65969300  |

|   |             |             |             |
|---|-------------|-------------|-------------|
| H | -3.81021100 | -6.02280700 | 2.67850600  |
| C | -3.19255400 | 2.00154100  | 1.82696100  |
| C | -4.59853600 | 1.91762700  | 1.85504800  |
| C | -2.51245100 | 2.52414400  | 2.94927100  |
| C | -5.30842800 | 2.33491900  | 2.99293600  |
| H | -5.14189500 | 1.54136200  | 0.98877100  |
| C | -3.22434500 | 2.94639900  | 4.08009000  |
| H | -1.42357200 | 2.60005700  | 2.93343700  |
| C | -4.62553400 | 2.84675500  | 4.10717500  |
| H | -6.39848400 | 2.26682200  | 3.00234100  |
| H | -2.68494300 | 3.34834600  | 4.94018700  |
| H | -5.18101000 | 3.16932700  | 4.99004600  |
| C | -1.75400900 | 3.18030900  | -0.32469900 |
| C | -2.75628600 | 4.00391900  | -0.88001400 |
| C | -0.43544100 | 3.65824600  | -0.21313100 |
| C | -2.42985100 | 5.28548800  | -1.34337700 |
| H | -3.78378900 | 3.64168500  | -0.94550900 |
| C | -0.11185800 | 4.94461000  | -0.67375200 |
| H | 0.34919400  | 3.01775300  | 0.19430400  |
| C | -1.10721000 | 5.75437200  | -1.24174800 |
| H | -3.20568400 | 5.91924300  | -1.77888300 |
| H | 0.92125600  | 5.28553800  | -0.59951900 |
| H | -0.85525300 | 6.75225800  | -1.60749500 |

**Int3c**

|   |            |             |             |
|---|------------|-------------|-------------|
| C | 4.57463200 | -0.18537800 | -2.92251400 |
| C | 5.67947500 | -0.04346200 | -2.01642000 |
| C | 5.19209600 | 0.53963900  | -0.79945400 |
| C | 3.77143700 | 0.76471800  | -0.94590600 |
| C | 3.40066700 | 0.31247000  | -2.26972300 |
| H | 4.61036900 | -0.64941000 | -3.90534600 |

|    |             |             |             |
|----|-------------|-------------|-------------|
| H  | 6.69664700  | -0.38710600 | -2.19228500 |
| H  | 5.77522200  | 0.71355800  | 0.09920900  |
| H  | 2.37991800  | 0.29812300  | -2.64548000 |
| Fe | 4.20481300  | -1.19625200 | -1.17667300 |
| C  | 3.76650900  | -2.19511600 | 0.54172400  |
| C  | 4.99610100  | -2.68278100 | -0.01039400 |
| C  | 2.72626300  | -2.38678700 | -0.44417000 |
| H  | 3.63806200  | -1.72948500 | 1.51301100  |
| C  | 4.73248300  | -3.16973000 | -1.33490700 |
| H  | 5.97087700  | -2.62969400 | 0.46932200  |
| C  | 3.33481400  | -2.99394300 | -1.60419800 |
| H  | 5.47235400  | -3.55025500 | -2.03566200 |
| H  | 2.81750400  | -3.22516200 | -2.53105200 |
| P  | 0.98429200  | -1.84450500 | -0.28687800 |
| P  | 2.50637400  | 1.37324700  | 0.21547900  |
| Pd | 0.46702200  | 0.42732100  | -0.37552500 |
| C  | -0.83785700 | 2.31715600  | -0.51023000 |
| H  | -1.04297200 | 2.28000000  | 0.56275600  |
| C  | -1.42181400 | 1.30806400  | -1.31706200 |
| C  | -1.74141500 | 0.07132800  | -0.70257800 |
| H  | -2.06020600 | -0.76860400 | -1.31760700 |
| H  | -1.96873100 | 0.01281700  | 0.35566300  |
| C  | -1.55215100 | 1.47418200  | -2.81434900 |
| H  | -2.42634200 | 2.11626600  | -3.01458900 |
| H  | -0.66478100 | 1.95638300  | -3.25356900 |
| H  | -1.71753000 | 0.50359500  | -3.30406300 |
| C  | -0.80400700 | 1.01497300  | 4.08353900  |
| H  | -0.67052800 | -0.05326000 | 4.35280900  |
| H  | 0.13675600  | 1.54087200  | 4.31037900  |
| H  | -1.60680100 | 1.43082500  | 4.72412600  |

|   |             |             |             |
|---|-------------|-------------|-------------|
| O | -1.08286800 | 1.18438700  | 2.70175300  |
| C | -4.01873500 | 2.75232200  | -0.12586000 |
| C | -4.63139900 | 1.66899100  | -0.84898000 |
| C | -5.11815200 | 1.92347200  | -2.15004500 |
| C | -4.96956800 | 3.20430800  | -2.70590800 |
| C | -4.35740400 | 4.25062200  | -1.97906400 |
| C | -3.88572100 | 4.03264200  | -0.66871500 |
| C | -3.88766800 | 0.86084500  | 1.17901600  |
| H | -5.59928700 | 1.12479400  | -2.72023400 |
| H | -5.34317100 | 3.39987900  | -3.71433800 |
| H | -4.26184700 | 5.24207800  | -2.42724100 |
| H | -3.42251100 | 4.84033900  | -0.09597600 |
| N | -3.62992600 | 2.24918600  | 1.10717700  |
| H | -3.02430700 | 2.70936800  | 1.77668800  |
| O | -3.47107400 | 0.14238200  | 2.15558000  |
| C | -4.52760500 | 0.49649400  | -0.04011500 |
| H | -1.98655700 | 0.75885000  | 2.54160700  |
| C | -4.99738900 | -0.89786400 | -0.34750500 |
| H | -4.30658700 | -1.60957900 | 0.13966700  |
| H | -4.95096100 | -1.08160500 | -1.43537200 |
| C | -6.41271400 | -1.17305000 | 0.14962900  |
| C | -7.47632200 | -1.39380500 | -0.74221600 |
| C | -6.67386200 | -1.17988400 | 1.53562300  |
| C | -8.77951200 | -1.61981200 | -0.26661400 |
| H | -7.28004000 | -1.38508000 | -1.81833800 |
| C | -7.97136300 | -1.40941700 | 2.01337800  |
| H | -5.84690900 | -0.99139900 | 2.22406600  |
| C | -9.03040000 | -1.63045600 | 1.11386000  |
| H | -9.59618300 | -1.78602600 | -0.97390400 |
| H | -8.16057000 | -1.41396100 | 3.08998700  |

|   |              |             |             |
|---|--------------|-------------|-------------|
| H | -10.04208900 | -1.80628900 | 1.48747600  |
| C | -0.38842900  | 3.64095300  | -1.06815100 |
| H | -1.28119000  | 4.23600500  | -1.33862600 |
| H | 0.19935500   | 4.20304100  | -0.33124300 |
| H | 0.22056400   | 3.52363900  | -1.97763800 |
| C | 0.20281200   | -2.73924300 | -1.69700500 |
| C | -0.02895300  | -2.01235500 | -2.88198000 |
| C | -0.14250000  | -4.10277300 | -1.63889200 |
| C | -0.58710000  | -2.64441100 | -4.00288100 |
| H | 0.20632600   | -0.94598000 | -2.90588900 |
| C | -0.71388900  | -4.73043600 | -2.75687300 |
| H | 0.01909500   | -4.66508100 | -0.71796800 |
| C | -0.93247300  | -4.00498400 | -3.94002400 |
| H | -0.76699400  | -2.07310600 | -4.91601500 |
| H | -0.99324800  | -5.78456600 | -2.70202700 |
| H | -1.38072000  | -4.49558300 | -4.80629600 |
| C | 0.42000800   | -2.70542000 | 1.23804200  |
| C | 1.00405600   | -3.91488900 | 1.67205400  |
| C | -0.62230000  | -2.12863100 | 1.99199000  |
| C | 0.53859700   | -4.54217000 | 2.83765100  |
| H | 1.82688900   | -4.35492300 | 1.10601900  |
| C | -1.09307500  | -2.76474900 | 3.15023800  |
| H | -1.05114400  | -1.17200300 | 1.70617300  |
| C | -0.51384100  | -3.97171400 | 3.57470400  |
| H | 0.99719700   | -5.47628500 | 3.16925600  |
| H | -1.91310800  | -2.30755400 | 3.70591300  |
| H | -0.87677000  | -4.46607800 | 4.47831700  |
| C | 2.72965300   | 3.19452300  | 0.23042500  |
| C | 2.30351500   | 3.93184400  | 1.35582100  |
| C | 3.18954000   | 3.87711500  | -0.91353200 |

|   |            |             |             |
|---|------------|-------------|-------------|
| C | 2.34238800 | 5.33298100  | 1.33481200  |
| H | 1.93750000 | 3.40816200  | 2.24110000  |
| C | 3.22391800 | 5.27974800  | -0.93029600 |
| H | 3.52006200 | 3.31157100  | -1.78691200 |
| C | 2.79983200 | 6.01075400  | 0.19122300  |
| H | 2.01280700 | 5.89601900  | 2.21046700  |
| H | 3.58364600 | 5.80105600  | -1.81990700 |
| H | 2.82505700 | 7.10206000  | 0.17526400  |
| C | 3.03888000 | 0.85552100  | 1.89543400  |
| C | 2.14054100 | 0.09467900  | 2.66851900  |
| C | 4.31538300 | 1.16180500  | 2.41094300  |
| C | 2.53675900 | -0.40984300 | 3.91745500  |
| H | 1.13259000 | -0.08849700 | 2.29897900  |
| C | 4.70981900 | 0.65557900  | 3.65752200  |
| H | 4.99166200 | 1.80268000  | 1.84351400  |
| C | 3.82564100 | -0.14392100 | 4.40533000  |
| H | 1.83431800 | -1.00852200 | 4.49942000  |
| H | 5.70275900 | 0.88701900  | 4.04892200  |
| H | 4.13821900 | -0.54196400 | 5.37297800  |

**TS3c**

|    |            |             |             |
|----|------------|-------------|-------------|
| C  | 4.59887200 | -0.04493800 | -2.86050800 |
| C  | 5.68957900 | 0.06865600  | -1.93277000 |
| C  | 5.18176500 | 0.61557800  | -0.70657800 |
| C  | 3.76546300 | 0.85078800  | -0.87160100 |
| C  | 3.41497400 | 0.43327100  | -2.21057100 |
| H  | 4.65163900 | -0.47657200 | -3.85738800 |
| H  | 6.70933600 | -0.27055000 | -2.10273300 |
| H  | 5.74361000 | 0.76010900  | 0.21132800  |
| H  | 2.40068700 | 0.44373600  | -2.60370000 |
| Fe | 4.21159000 | -1.11633500 | -1.15356000 |



|    |             |             |             |
|----|-------------|-------------|-------------|
| C  | 3.77830900  | -2.17662400 | 0.53115300  |
| C  | 5.02864600  | -2.60991600 | -0.01896900 |
| C  | 2.75255700  | -2.37708800 | -0.46731200 |
| H  | 3.62709800  | -1.73750700 | 1.51161900  |
| C  | 4.79241800  | -3.06964200 | -1.35776700 |
| H  | 5.99642700  | -2.53768700 | 0.47220500  |
| C  | 3.39201100  | -2.93098000 | -1.63631600 |
| H  | 5.54978900  | -3.40809200 | -2.06159300 |
| H  | 2.89551700  | -3.16254300 | -2.57369900 |
| P  | 1.00425600  | -1.87283800 | -0.25513400 |
| P  | 2.47897600  | 1.39003800  | 0.29791700  |
| Pd | 0.48755800  | 0.38265900  | -0.27903000 |
| C  | -0.80371300 | 2.16258600  | -0.79574900 |
| H  | -1.04801900 | 2.44617100  | 0.23103200  |
| C  | -1.42787200 | 0.99159900  | -1.31084600 |
| C  | -1.89413800 | 0.01684900  | -0.39237300 |
| H  | -2.20595900 | -0.95936400 | -0.75774400 |
| H  | -1.91218000 | 0.18928600  | 0.67968100  |
| C  | -1.52841100 | 0.72974300  | -2.79993800 |
| H  | -2.36093900 | 1.31356900  | -3.22405300 |
| H  | -0.60343700 | 1.02526100  | -3.31990300 |
| H  | -1.71260400 | -0.33478200 | -2.99549900 |
| O  | -0.84711700 | 1.39770000  | 2.57084700  |
| C  | -4.21348800 | 2.43676900  | -1.31842700 |
| C  | -4.60711900 | 1.05702900  | -1.32411900 |
| C  | -5.06899800 | 0.49127200  | -2.52792300 |
| C  | -5.10325000 | 1.27926200  | -3.69005600 |
| C  | -4.68829300 | 2.62813100  | -3.66706000 |
| C  | -4.24599400 | 3.22652200  | -2.46914200 |
| C  | -3.87717500 | 1.61463800  | 0.81117300  |

|   |             |             |             |
|---|-------------|-------------|-------------|
| H | -5.38730100 | -0.55354600 | -2.55611100 |
| H | -5.45534200 | 0.84244300  | -4.62760300 |
| H | -4.72055000 | 3.22226700  | -4.58281600 |
| H | -3.93676900 | 4.27457200  | -2.44425000 |
| N | -3.81841200 | 2.74707700  | -0.02256500 |
| H | -3.43510700 | 3.63125000  | 0.28686500  |
| O | -3.48962300 | 1.62247000  | 2.01867900  |
| C | -4.33710100 | 0.52945500  | -0.01698100 |
| H | -1.79527000 | 1.57688100  | 2.30711900  |
| C | -4.69401800 | -0.82584900 | 0.52816000  |
| H | -3.98853600 | -1.06449300 | 1.34389900  |
| H | -4.56530600 | -1.59312000 | -0.25535200 |
| C | -6.11756100 | -0.88626900 | 1.06806100  |
| C | -7.11851600 | -1.62393900 | 0.41255000  |
| C | -6.45411700 | -0.16254100 | 2.23074000  |
| C | -8.43433800 | -1.64589900 | 0.90530700  |
| H | -6.86304100 | -2.18329000 | -0.49200900 |
| C | -7.76506100 | -0.18550800 | 2.72640200  |
| H | -5.67711600 | 0.42447200  | 2.72524200  |
| C | -8.76081200 | -0.92786600 | 2.06589100  |
| H | -9.20182500 | -2.22249700 | 0.38281300  |
| H | -8.01348500 | 0.37808400  | 3.62928200  |
| H | -9.78266100 | -0.94330400 | 2.45235000  |
| C | -0.30869900 | 3.27513400  | -1.68876200 |
| H | -1.16579000 | 3.84195900  | -2.10018000 |
| H | 0.33186700  | 3.97069500  | -1.13076400 |
| H | 0.26366200  | 2.88649300  | -2.54508800 |
| C | 0.15156600  | -2.68928000 | -1.66675900 |
| C | 0.44374300  | -2.23162000 | -2.97080700 |
| C | -0.87493400 | -3.63656800 | -1.48368600 |

|   |             |             |             |
|---|-------------|-------------|-------------|
| C | -0.26164100 | -2.73174600 | -4.07283300 |
| H | 1.21218500  | -1.47052100 | -3.11525800 |
| C | -1.59396300 | -4.12013100 | -2.58950100 |
| H | -1.11574900 | -3.98954900 | -0.48025600 |
| C | -1.28801000 | -3.67437300 | -3.88459500 |
| H | -0.02537500 | -2.37125300 | -5.07622200 |
| H | -2.39341900 | -4.84785400 | -2.43528500 |
| H | -1.84985300 | -4.05071500 | -4.74154100 |
| C | 0.47209700  | -2.79811000 | 1.24036600  |
| C | 0.90605800  | -4.11456600 | 1.50023900  |
| C | -0.38875900 | -2.15192000 | 2.15128700  |
| C | 0.47730200  | -4.77949900 | 2.65817600  |
| H | 1.57942900  | -4.61038000 | 0.79830300  |
| C | -0.81718900 | -2.82236600 | 3.30807900  |
| H | -0.69625200 | -1.12050300 | 1.96741500  |
| C | -0.38629200 | -4.13464700 | 3.56147600  |
| H | 0.81630000  | -5.79841100 | 2.85707700  |
| H | -1.48160500 | -2.31456800 | 4.00957300  |
| H | -0.71830300 | -4.65436100 | 4.46268700  |
| C | 3.11231500  | 0.93891000  | 1.96561900  |
| C | 2.33619500  | 0.07655500  | 2.76112100  |
| C | 4.33897100  | 1.42617900  | 2.46046000  |
| C | 2.80306500  | -0.34103700 | 4.01728100  |
| H | 1.37001200  | -0.25741400 | 2.38885200  |
| C | 4.80630000  | 1.00789300  | 3.71529000  |
| H | 4.91754500  | 2.13959500  | 1.87060000  |
| C | 4.04387500  | 0.11539500  | 4.49048100  |
| H | 2.19505100  | -1.01974700 | 4.61885000  |
| H | 5.76034200  | 1.38239500  | 4.09262200  |
| H | 4.41142000  | -0.20922300 | 5.46619000  |

|   |             |            |             |
|---|-------------|------------|-------------|
| C | 2.54926700  | 3.22323600 | 0.32672700  |
| C | 1.66451900  | 3.88153300 | 1.21099400  |
| C | 3.36434300  | 3.97509700 | -0.53943400 |
| C | 1.61325200  | 5.28112200 | 1.23028600  |
| H | 1.00413700  | 3.29588600 | 1.85633000  |
| C | 3.29758800  | 5.37871900 | -0.52300400 |
| H | 4.04317100  | 3.46536900 | -1.22592000 |
| C | 2.42620500  | 6.03288800 | 0.36136200  |
| H | 0.92978600  | 5.78749400 | 1.91532500  |
| H | 3.92845300  | 5.95869700 | -1.20025900 |
| H | 2.37538700  | 7.12362900 | 0.37201500  |
| C | -0.91034300 | 1.00760000 | 3.93817900  |
| H | 0.10699900  | 0.73132400 | 4.25377800  |
| H | -1.27036700 | 1.82846700 | 4.58881700  |
| H | -1.58106800 | 0.13835400 | 4.08646300  |
